# Supplementary material for: Compound Danshen Dropping Pills Enhanced Erythrocyte Oxygen Delivery Capacity via Modulating ROS-Dependent Mechanism Based on Target-Network Analysis
Source: Preprints.org preprint supplement (doi:10.20944/preprints201912.0258.v1), 2019-12-19
Supplement: Supplementary file 1 [file supplementary]

# Quick reference guide

## User Data

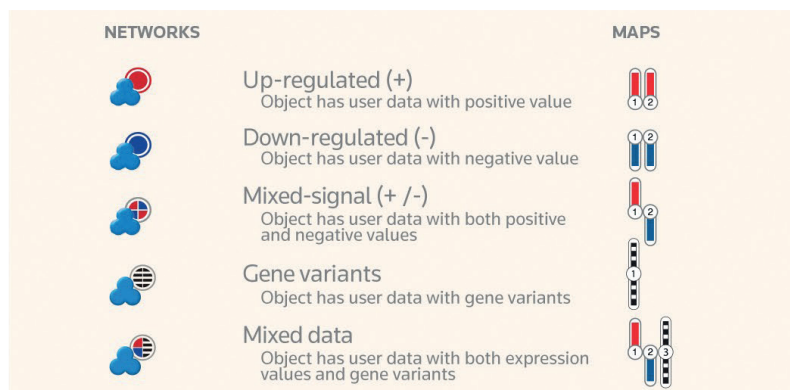

## Network Objects

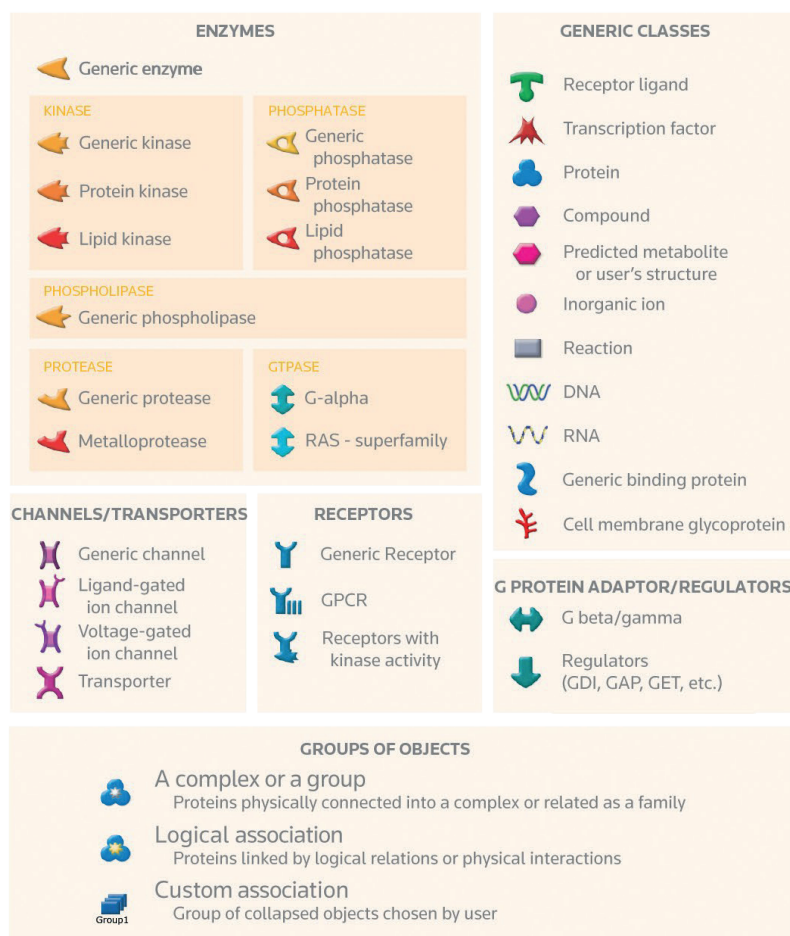

## Interactions between objects

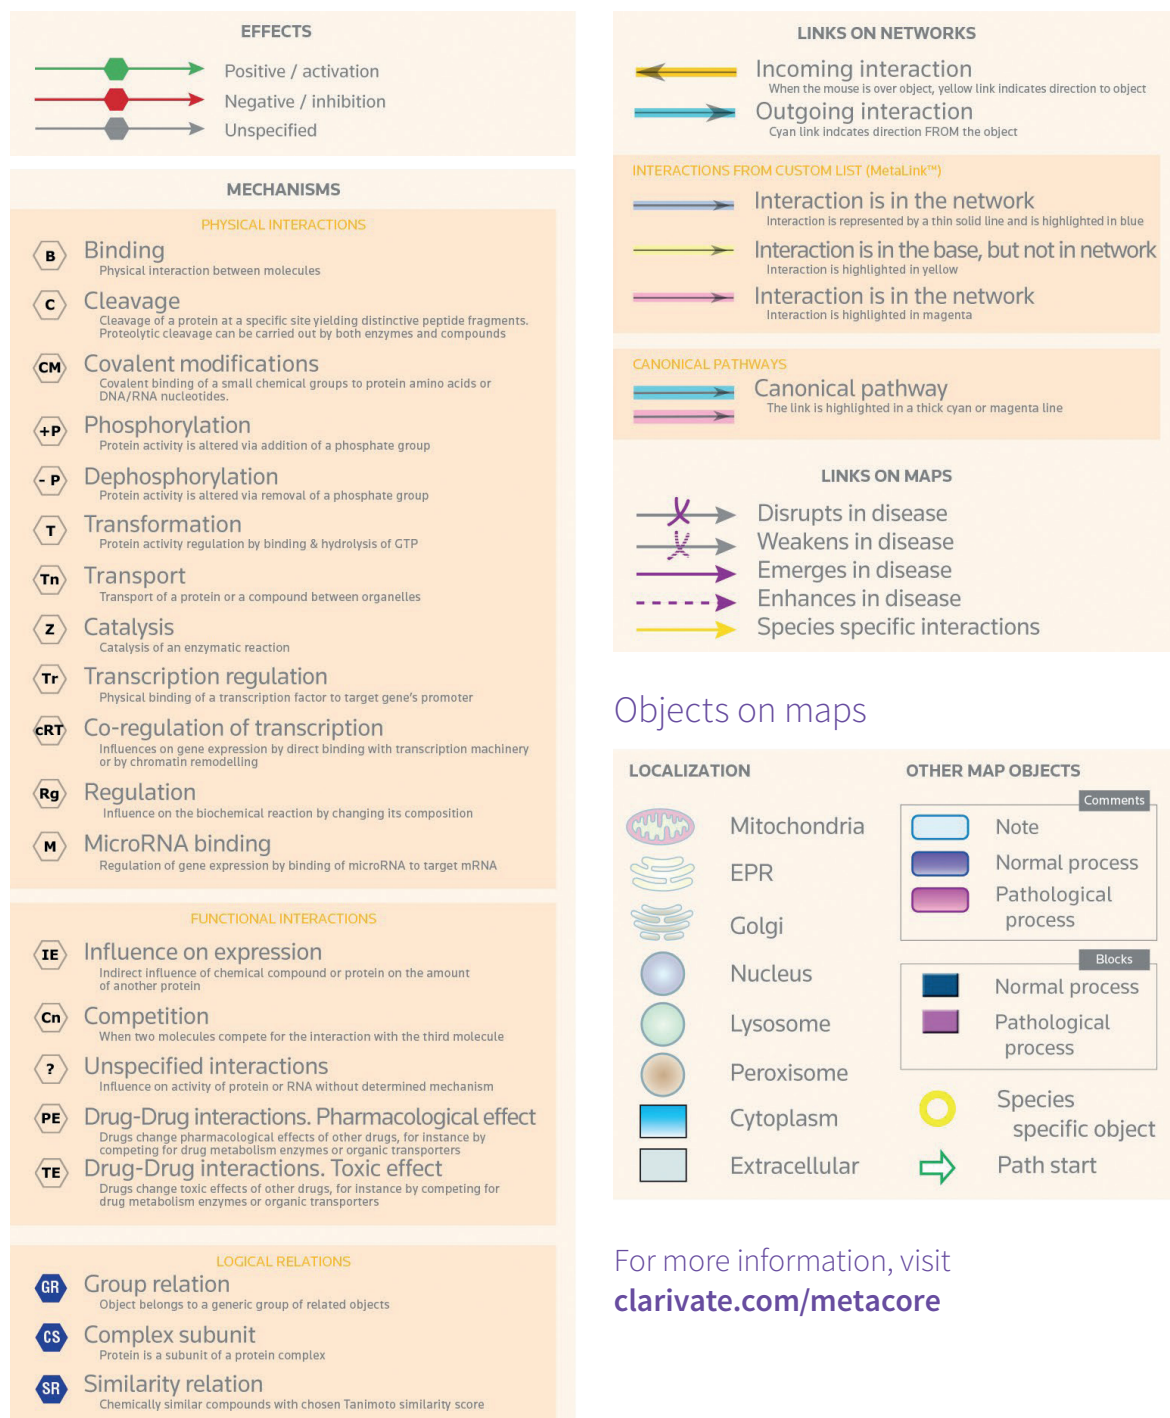

For more information, visit  
[clarivate.com/metacore](https://clarivate.com/metacore)

### North America

Philadelphia: +1 800 336 4474  
 +1 215 386 0100

### Latin America

Brazil: +55 11 8370 9845  
 Other countries: +1 215 823 5674

11.2018

© 2018 Clarivate Analytics

### Europe, Middle East and Africa

London: +44 20 7433 4000

### Asia Pacific

Singapore: +65 6775 5088  
 Tokyo: +81 3 4589 3107

[clarivate.com](https://clarivate.com)
