# Supplementary material for: Compound Danshen Dropping Pills Enhanced Erythrocyte Oxygen Delivery Capacity via Modulating ROS-Dependent Mechanism Based on Target-Network Analysis
Source: Preprints.org preprint supplement (doi:10.20944/preprints201912.0258.v1), 2019-12-19
Supplement: Supplementary file 1 [file supplementary]

## Sheet: analysis1
targetname	geneid	aid	aidname	﻿acvalue(um)	acname	aidtype	activity	aidsrcname	baid	doi
IL1B - interleukin 1 beta (human)	3553	743279	qHTS for Inhibitors of Inflammasome Signaling: IL-1-beta AlphaLISA Primary Screen		NULL	Screening	Inactive	NCGC	436723748
IL1B - interleukin 1 beta (human)	3553	743279	qHTS for Inhibitors of Inflammasome Signaling: IL-1-beta AlphaLISA Primary Screen		NULL	Screening	Inactive	NCGC	436699384
IL1B - interleukin 1 beta (human)	3553	743279	qHTS for Inhibitors of Inflammasome Signaling: IL-1-beta AlphaLISA Primary Screen		NULL	Screening	Inactive	NCGC	436629820	NULL
IL1B - interleukin 1 beta (human)	3553	743279	qHTS for Inhibitors of Inflammasome Signaling: IL-1-beta AlphaLISA Primary Screen		NULL	Screening	Active	NCGC	436815821	NULL
IL1B - interleukin 1 beta (human)	3553	743279	qHTS for Inhibitors of Inflammasome Signaling: IL-1-beta AlphaLISA Primary Screen		NULL	Screening	Inactive	NCGC	436873310	NULL
IL1B - interleukin 1 beta (human)	3553	743279	qHTS for Inhibitors of Inflammasome Signaling: IL-1-beta AlphaLISA Primary Screen		NULL	Screening	Inactive	NCGC	436591159	NULL
IL1B - interleukin 1 beta (human)	3553	743279	qHTS for Inhibitors of Inflammasome Signaling: IL-1-beta AlphaLISA Primary Screen		NULL	Screening	Inactive	NCGC	436617043	NULL
IL1B - interleukin 1 beta (human)	3553	743279	qHTS for Inhibitors of Inflammasome Signaling: IL-1-beta AlphaLISA Primary Screen		NULL	Screening	Inactive	NCGC	436521538	NULL
TNF - tumor necrosis factor (human)	7124	651757	qHTS assay to identify small molecules that stimulate Tumor Necrosis Factor-alpha (TNF-alpha) secretion		Potency	Confirmatory	Inconclusive	NCGC	410332070	NULL
NFKBIA - NFKB inhibitor alpha (human)	4792	445	IkB Signaling		NULL	Confirmatory	Inactive	NCGC	4401465	NULL
NFKBIA - NFKB inhibitor alpha (human)	4792	445	IkB Signaling		NULL	Confirmatory	Inactive	NCGC	4551940	NULL
NFKBIA - NFKB inhibitor alpha (human)	4792	445	IkB Signaling		NULL	Confirmatory	Inactive	NCGC	4430902	NULL
NFKBIA - NFKB inhibitor alpha (human)	4792	445	IkB Signaling		NULL	Confirmatory	Inactive	NCGC	4448595	NULL
NFKBIA - NFKB inhibitor alpha (human)	4792	445	IkB Signaling		NULL	Confirmatory	Inactive	NCGC	4510086	NULL
NFKBIA - NFKB inhibitor alpha (human)	4792	445	IkB Signaling		NULL	Confirmatory	Inconclusive	NCGC	4430903	NULL

## Sheet: analysis2
target	pref_name	p value(ap)	cnt	accession	Entry name	Gene names	Gene names (primary )	Gene names (synonym )	3D	Cross-reference (PDB)
CHEMBL3964	Phospholipase C-gamma-1	3.33067e-16	1	P19174	TNFA_HUMAN	TNF TNFA TNFSF2	TNF	TNFA TNFSF2	X-ray crystallography (23)	1A8M;1TNF;2AZ5;2E7A;2TUN;2ZJC;2ZPX;3ALQ;3IT8;3L9J;3WD5;4G3Y;4TSV;4TWT;4Y6O;5M2I;5M2J;5M2M;5MU8;5TSW;5UUI;5WUX;5YOY;
CHEMBL3305	Testis-specific androgen-binding protein	6.56879e-05	1	P04278	IKBA_HUMAN	NFKBIA IKBA MAD3 NFKBI	NFKBIA	IKBA MAD3 NFKBI	X-ray crystallography (2)	1IKN;1NFI;

## Sheet: analysis3
Compound name	Chemical_compound	PDB_Chains_ID	Molecule_type	Uniprot_ID	GENE NAME	Affinity(kcal/mol)	pKi	Target_name
quercetin	5280343	1dgh_CA	homo-oligomer	P04040,P04040	CAT,CAT	-8.6	6.31	CAT
Tanshinone IIA	164676	1itb_AB	hetero-oligomer	P01584,P14778	IL1B,IL1R1	-8.4	6.16	IL1B
quercetin	5280343	1ikn_ADC	monomer	P25963	NFKBIA	-8.2	6.01	NFKBIA
Tanshinone IIA	164676	1nsi_BA	homo-oligomer	P35228,P35228	NOS2,NOS2	-9.2	6.75	NOS2
