# Supplementary material for: Compound Danshen Dropping Pills Enhanced Erythrocyte Oxygen Delivery Capacity via Modulating ROS-Dependent Mechanism Based on Target-Network Analysis
Source: Preprints.org preprint supplement (doi:10.20944/preprints201912.0258.v1), 2019-12-19
Supplement: Supplementary file 2 [file Additional file1.xlsx]

## Sheet: Targets of CDDP
Gene Name	Protein Name	Expression Level
ACTN1	α-Actinin	up
ANGPT2	AngII	down
AQP1	AQP1	up
AQP3	AQP3	up
BAX	Bax	down
BCL2	Bcl2	up
CASP3	Caspase-3	down
CAT	CAT	up
CCL2	MCP-1	down
CD34	CD34	down
CD63	CD63	down
CD74	MHC	up
CKB	CK	down
CKMT1A	CK-MB	down
CKMT1B	CK-MB	down
CRP	CRP	down
CTGF	CTGF	down
CYP1A2	CYP1A2	down
DES	Desmin	up
EDN1	ET	down
FASN	Fas	down
GABBR1	GABABR1	up
GJA1	CX43	down
GPT	ALT	down
GRIA1	GluR1	down
HIF1A	HIF-1α	down
ICAM1	ICAM-1	down
IKBKG	NF-κB	down
IL1B	IL-1β	down
IL6	IL-6	down
INS	Insulin	up
LDHA	LDH	down
LDHC	LDH	down
LEP	Leptin	down
MIF	MIF	down
MMP2	MMP-2	down
MMP9	MMP-9	down
MYC	c-myc	down
NFAT3	NFAT3	down
NFATC4	NFAT3	down
NFKB1	NF-κB	down
NFKBIA	IκBα	up
NOS1	NOS	up
NOS2	iNOS	up
NOS3	eNOS	up
PLAT	t-PA	up
PTPRC	CD45	down
RABAC1	PRA	down
SELP	CD62p	down
SERPINE1	PAI-1	down
SOD1	SOD	up
SOD3	SOD	up
TGFB1	TGF-β1	down
THY1	CD90	down
TLR4	TLR4	down
TNF	TNF-α	down
TNNI3	TNT	down
TNNT2	cTNT	down
UBC	ubiquitin	down
VCAM1	VCAM-1	down
VEGFA	VEGF	down
GOT1	AST1	down
GOT2	KAT4	down
CKM	CPK	down
MB	MB	down
GPX1	GSH-PX	up
HSPA1A	HSP70	up
IL1A	IL-1	down
GDNF	GDNF	up
ACTA2	α-SMA	down
CYP11B2	ALD	down
GCK	GSP	down
PECAM1	CD31	up
ITGB2	CD18	down
RCAN1	CaN	down
miRNA-1		down
SMAD3	P-Smad3	down
SMAD4	SMAD4	down
RPS19	RPS19	down
