# Supplementary material for: Compound Danshen Dropping Pills Enhanced Erythrocyte Oxygen Delivery Capacity via Modulating ROS-Dependent Mechanism Based on Target-Network Analysis
Source: Preprints.org preprint supplement (doi:10.20944/preprints201912.0258.v1), 2019-12-19
Supplement: Supplementary file 3 [file Additional file2.xlsx]

## Sheet: Targets of CDDP
Gene Name
ABL1
ABL2
PRKAA2
AURKA
AURKB
AXL
CAMK2G
CDK12
CDKL3
CDKL4
CSNK1G3
CSNK2A1
CSNK2A2
CLK1
CLK4
KIT
DDR1
STK17A
DYRK1A
EPHA3
ERBB2
FGFR1
FGFR4
FGR
FLT1
FLT3
CSF1R
FYN
EIF2AK4
GRK1
GSK3B
HIPK4
EIF2AK1
ERN1
IRAK4
LCK
LYN
MAPK1
MAP4K3
MET
MAP2K3
PAK2
EIF2AK3
PDGFRA
PDGFRB
PIM1
PIM2
PRKCQ
PRKCI
PRKD1
EIF2AK2
RET
RPS6KA3
SGK1
SLK
SRPK1
SRPK2
SYK
TRIB2
NTRK2
NTRK3
ULK3
ZAP70
ATR
PIK3CA
PIK3C2G
PIP4K2A
PIP5K1A
PIP5K1C
