# Supplementary material for: Compound Danshen Dropping Pills Enhanced Erythrocyte Oxygen Delivery Capacity via Modulating ROS-Dependent Mechanism Based on Target-Network Analysis
Source: Preprints.org preprint supplement (doi:10.20944/preprints201912.0258.v1), 2019-12-19
Supplement: Supplementary file 4 [file Additional file3.xls]

## Sheet: Pathway Maps
Enrichment analysis report
Enrichment by Pathway Maps
#	Maps	Total	min(pValue)	Min FDR	p-value	FDR	In Data	Network Objects from Active Data
1	Oxidative stress_ROS-induced cellular signaling	108	9.11413e-22	1.13106e-18	9.11413e-22	1.13106e-18	24	c-Abl, NF-kB, Casein kinase II, alpha chains, iNOS, Syk, Catalase, NF-kB p50/p65, HSPA1A, GPX1, GSK3 beta, PAI1, ERK1/2, AMPK alpha subunit, PKC, RelA (p65 NF-kB subunit), IL-1 beta, VEGF-A, IL-6, PRKD1, NFKBIA, TNF-alpha, Bax, HIF1A, FASN
2	Immune response_Lysophosphatidic acid signaling via NF-kB	52	1.94081e-20	1.20427e-17	1.94081e-20	1.20427e-17	18	Caspase-3, NF-kB, NF-kB p50/p65, MMP-9, PKD, VCAM1, ICAM1, ERK1/2, IKK-gamma, PKC, RelA (p65 NF-kB subunit), VEGF-A, IL-6, CCL2, p90Rsk, MMP-2, NFKBIA, Bax
3	Vascular endothelial cell damage in SLE	63	1.02044e-18	4.22122e-16	1.02044e-18	4.22122e-16	18	Caspase-3, NF-kB, iNOS, NF-kB p50/p65, IL-1 alpha, Endothelin-1, PAI1, VCAM1, ICAM1, TGF-beta 1, ERK1/2, RelA (p65 NF-kB subunit), IL-1 beta, VEGF-A, IL-6, CCL2, TNF-alpha, P-selectin
4	Signal transduction_Angiotensin II/AGTR1 signaling via Notch, Beta-catenin and NF-kB pathways	76	1.76047e-18	5.46185e-16	1.76047e-18	5.46185e-16	19	I-kB, NF-kB, ACTA2, NF-kB p50/p65, GSK3 beta, MMP-9, Connexin 43, CTGF, ERK1/2, IKK-gamma, PKC, RelA (p65 NF-kB subunit), VEGF-A, ERK2 (MAPK1), IL-6, CCL2, c-Myc, PRKD1, MMP-2
5	HBV-dependent NF-kB and PI3K/AKT pathways leading to HCC	50	5.49677e-18	3.60039e-15	1.54358e-10	2.55411e-09	11	PI3K cat class IA, I-kB, NF-kB, iNOS, NF-kB p50/p65, GSK3 beta, MMP-9, TGF-beta 1, RelA (p65 NF-kB subunit), NF-kB1 (p105), NFKBIA
6	Immune response_HMGB1/RAGE signaling pathway	53	3.42937e-17	8.51169e-15	3.42937e-17	8.51169e-15	16	PI3K cat class IA, I-kB, NF-kB, iNOS, IL-1 alpha, PAI1, VCAM1, TLR4, ICAM1, ERK1/2, IL-1 beta, IL-6, p90RSK2(RPS6KA3), NFKBIA, PLAT (TPA), TNF-alpha
7	Immune response_IL-33 signaling pathway	58	1.73033e-16	3.5789e-14	1.73033e-16	3.5789e-14	16	MEK3(MAP2K3), PI3K cat class IA, I-kB, NF-kB, IRAK4, NF-kB p50/p65, VCAM1, Ubiquitin, ICAM1, ERK1/2, IKK-gamma, RelA (p65 NF-kB subunit), IL-6, CCL2, eNOS, TNF-alpha
8	Stellate cells activation and liver fibrosis	70	2.03843e-16	3.61384e-14	2.03843e-16	3.61384e-14	17	PI3K cat class IA, I-kB, ACTA2, ERK1 (MAPK3), PDGF receptor, NF-kB p50/p65, GSK3 beta, ICAM1, TGF-beta 1, IKK-gamma, PDGF-R-alpha, IL-1 beta, ERK2 (MAPK1), PDGF-R-beta, CCL2, MMP-2, TNF-alpha
9	Development_PEDF signaling	49	2.72748e-16	4.23101e-14	2.72748e-16	4.23101e-14	15	PI3K cat class IA, NF-kB, NF-kB p50/p50, NF-kB p50/p65, Bcl-2, ERK1/2, RelA (p65 NF-kB subunit), IL-1 beta, VEGF-A, IL-6, p90RSK2(RPS6KA3), NFKBIA, TNF-alpha, GDNF, NF-kB1 (p50)
10	Immune response_IL-18 signaling	63	7.42694e-16	1.02409e-13	7.42694e-16	1.02409e-13	16	MEK3(MAP2K3), PI3K cat class IA, I-kB, NF-kB, IRAK4, iNOS, Bcl-2, IL-1 alpha, MMP-9, VCAM1, ICAM1, ERK1/2, IL-1 beta, IL-6, CCL2, TNF-alpha
11	Immune response_HSP60 and HSP70/ TLR signaling pathway	54	1.40318e-15	1.74135e-13	1.40318e-15	1.74135e-13	15	MEK3(MAP2K3), I-kB, NF-kB, IRAK4, iNOS, Ubiquitin, TLR4, ICAM1, ERK1/2, IKK-gamma, IL-1 beta, NF-kB1 (p105), IL-6, HSP70, TNF-alpha
12	Glomerular injury in Lupus Nephritis	92	1.58718e-15	1.79062e-13	1.58718e-15	1.79062e-13	18	NF-kB, iNOS, NF-kB p50/p65, Bcl-2, ErbB2, MMP-9, VCAM1, ICAM1, ERK1/2, RelA (p65 NF-kB subunit), IL-1 beta, IL-6, PDGF-R-beta, TGF-beta, CCL2, TNF-alpha, Bax, HIF1A
13	Inflammatory mechanisms of pancreatic cancerogenesis	67	2.16185e-15	2.23571e-13	2.16185e-15	2.23571e-13	16	NF-kB, iNOS, NF-kB p50/p65, Bcl-2, IL-1 alpha, MMP-9, TLR4, ICAM1, RelA (p65 NF-kB subunit), IL-1 beta, VEGF-A, IL-6, CCL2, MMP-2, NFKBIA, TNF-alpha
14	Role of IL-8 in melanoma	36	2.35866e-15	2.25162e-13	2.35866e-15	2.25162e-13	13	NF-kB, ITGB2, ICAM1, TGF-beta 1, ERK1/2, RelA (p65 NF-kB subunit), IL-1 beta, VEGF-A, IL-6, MMP-2, NFKBIA, TNF-alpha, NF-kB1 (p50)
15	Putative role of Estrogen receptor and Androgen receptor signaling in progression of lung cancer	58	2.50593e-15	1.09426e-12	0.000230841	0.000622768	6	Caspase-3, ERK1 (MAPK3), Bcl-2, ERK1/2, ERK2 (MAPK1), Bax
16	Immune response_IL-1 signaling pathway	82	3.58497e-15	2.96636e-13	3.58497e-15	2.96636e-13	17	MEK3(MAP2K3), PI3K cat class IA, I-kB, NF-kB, iNOS, NF-kB p50/p65, IL-1 alpha, MMP-9, ICAM1, ERK1/2, RelA (p65 NF-kB subunit), IL-1 beta, NF-kB1 (p105), IL-6, CCL2, TNF-alpha, NF-kB1 (p50)
17	Immune response_TLR2 and TLR4 signaling pathways	69	3.58545e-15	2.96636e-13	3.58545e-15	2.96636e-13	16	MEK3(MAP2K3), PI3K cat class IA, I-kB, NF-kB, IRAK4, iNOS, Ubiquitin, TLR4, ERK1/2, IKK-gamma, IL-1 beta, NF-kB1 (p105), IL-6, p90Rsk, Lyn, TNF-alpha
18	PI3K signaling in gastric cancer	51	5.04153e-15	1.6511e-12	5.91765e-08	4.34544e-07	9	PI3K cat class IA, I-kB, NF-kB p50/p65, GSK3 beta, PAI1, RelA (p65 NF-kB subunit), PI3K cat class IA (p110-alpha), HGF receptor (Met), HIF1A
19	Role of adipose tissue hypoxia in obesity and type 2 diabetes	30	6.67881e-15	5.18025e-13	6.67881e-15	5.18025e-13	12	MIF, MMP-9, PAI1, TGF-beta 1, RelA (p65 NF-kB subunit), IL-1 beta, VEGF-A, IL-6, Leptin, CCL2, TNF-alpha, HIF1A
20	Immune response_MIF-mediated glucocorticoid regulation	23	7.95692e-15	5.39858e-13	7.95692e-15	5.39858e-13	11	I-kB, NF-kB, CD74, iNOS, MIF, VCAM1, ICAM1, ERK1/2, IL-6, NFKBIA, TNF-alpha
21	Role of stellate cells in progression of pancreatic cancer	60	7.97279e-15	5.39858e-13	7.97279e-15	5.39858e-13	15	PI3K cat class IA, ACTA2, PDGF receptor, NF-kB p50/p65, TGF-beta 1, CTGF, ERK1/2, RelA (p65 NF-kB subunit), PDGF-R-alpha, IL-6, PDGF-R-beta, CCL2, NF-kB p65/p65, MMP-2, NFKBIA
22	PDE4 regulation of cyto/chemokine expression in arthritis	49	8.26535e-15	5.39858e-13	8.26535e-15	5.39858e-13	14	PI3K cat class IA, I-kB, GSK3 alpha/beta, NF-kB p50/p50, NF-kB p50/p65, IL-1 alpha, IKK-gamma, RelA (p65 NF-kB subunit), IL-1 beta, IL-6, CCL2, Lck, TNF-alpha, NF-kB1 (p50)
23	Signal transduction_Additional pathways of NF-kB activation (in the cytoplasm)	52	2.08176e-14	1.29173e-12	2.08176e-14	1.29173e-12	14	PI3K cat class IA, I-kB, Casein kinase II, alpha chain (CSNK2A1), NF-kB p50/p65, Pim-1, ERK1/2, IKK-gamma, RelA (p65 NF-kB subunit), Lck, PRKD1, NFKBIA, PKC-lambda/iota, NF-kB1 (p50), PKC-theta
24	Main chemotherapy drugs and their action in SCLC cells	100	2.61517e-14	6.85174e-12	3.04274e-07	1.81541e-06	11	c-Abl, Caspase-3, Bcl-2, ErbB2, GPX1, GSK3 beta, ERK1/2, RelA (p65 NF-kB subunit), CCL2, TNF-alpha, Bax
25	Influence of multiple myeloma cells on bone marrow stromal cells	33	2.63412e-14	1.55664e-12	2.63412e-14	1.55664e-12	12	NF-kB, FGFR1, VCAM1, ICAM1, TGF-beta 1, RelA (p65 NF-kB subunit), IL-1 beta, VEGF-A, IL-6, FGFR4, TNF-alpha, NF-kB1 (p50)
26	Development_VEGF signaling via VEGFR2 - generic cascades	93	3.30544e-14	1.86457e-12	3.30544e-14	1.86457e-12	17	MEK3(MAP2K3), PI3K cat class IA, I-kB, iNOS, ERK1 (MAPK3), NF-kB p50/p65, GSK3 beta, ERK1/2, IKK-gamma, PKC, VEGF-A, ERK2 (MAPK1), CCL2, p90Rsk, eNOS, Fyn, PAK2
27	Immune response_IL-11 signaling pathway via MEK/ERK and PI3K/AKT cascades	67	4.72845e-14	2.46708e-12	4.72845e-14	2.46708e-12	15	Caspase-3, I-kB, GSK3 beta, SFK, ICAM1, ERK1/2, IKK-gamma, RelA (p65 NF-kB subunit), IL-1 beta, IL-6, p90Rsk, Fyn, NFKBIA, PI3K cat class IA (p110-alpha), TNF-alpha
28	K-RAS signaling in pancreatic cancer	44	4.77115e-14	2.46708e-12	4.77115e-14	2.46708e-12	13	MEK3(MAP2K3), GSK3 alpha/beta, NF-kB p50/p65, Bcl-2, ATR, ERK1/2, RelA (p65 NF-kB subunit), VEGF-A, FGFR4, c-Myc, NFKBIA, PI3K cat class IA (p110-alpha), Bax
29	Role of free fatty acids in obesity and type 2 diabetes	45	6.62198e-14	3.28715e-12	6.62198e-14	3.28715e-12	13	PI3K cat class IA, iNOS, NF-kB p50/p65, TLR4, RelA (p65 NF-kB subunit), IL-1 beta, IL-6, CCL2, Insulin processed, NFKBIA, TNF-alpha, NF-kB1 (p50), PKC-theta
30	Immune response_Histamine H1 receptor signaling in immune response	47	1.24295e-13	5.71299e-12	1.24295e-13	5.71299e-12	13	I-kB, iNOS, ERK1 (MAPK3), NF-kB p50/p65, MMP-9, VCAM1, ICAM1, RelA (p65 NF-kB subunit), ERK2 (MAPK1), IL-6, eNOS, NFKBIA, TNF-alpha
31	Canonical Leptin pathways in breast cancer	47	1.24295e-13	5.71299e-12	1.24295e-13	5.71299e-12	13	PI3K cat class IA, I-kB, NF-kB, NF-kB p50/p65, GSK3 beta, IL-1 alpha, ERK1/2, RelA (p65 NF-kB subunit), IL-1 beta, VEGF-A, Leptin, c-Myc, HIF1A
32	Development_Growth factors in regulation of oligodendrocyte precursor cell survival	37	1.30498e-13	5.78384e-12	1.30498e-13	5.78384e-12	12	PI3K cat class IA, Caspase-3, Bcl-2, ErbB2, GSK3 beta, RelA (p65 NF-kB subunit), PDGF-R-alpha, p90Rsk, Fyn, Lyn, NFKBIA, Bax
33	Immune response_TREM1 signaling pathway	60	1.83799e-13	7.86533e-12	1.83799e-13	7.86533e-12	14	PI3K cat class IA, I-kB, Syk, NF-kB p50/p65, Ubiquitin, TLR4, ERK1/2, IKK-gamma, IL-1 beta, IL-6, CCL2, NFKBIA, TNF-alpha, Bax
34	HGF signaling in colorectal cancer	64	2.67268e-13	5.00174e-11	4.9974e-06	2.11665e-05	8	PI3K cat class IA, GSK3 beta, MMP-9, ERK1/2, VEGF-A, c-Myc, MMP-2, HGF receptor (Met)
35	Ovarian cancer (main signaling cascades)	65	3.47778e-13	5.69487e-11	1.1457e-11	2.84362e-10	13	PI3K cat class IA, I-kB, NF-kB, ErbB2, GSK3 beta, MMP-9, Endothelin-1, ERK1/2, IL-6, c-Myc, MMP-2, PI3K cat class IA (p110-alpha), HGF receptor (Met)
36	IL-1 beta- and Endothelin-1-induced fibroblast/ myofibroblast migration and extracellular matrix production in asthmatic airways	40	3.78381e-13	1.56524e-11	3.78381e-13	1.56524e-11	12	NF-kB, NF-kB p50/p65, IL-1 alpha, Endothelin-1, PAI1, CTGF, ERK1/2, PDGF-R-alpha, IL-1 beta, PDGF-R-beta, CCL2, MMP-2
37	Signal transduction_NF-kB activation pathways	51	3.99287e-13	1.59844e-11	3.99287e-13	1.59844e-11	13	I-kB, NF-kB, IRAK4, NF-kB p50/p65, IL-1 alpha, Ubiquitin, TLR4, IKK-gamma, RelA (p65 NF-kB subunit), IL-1 beta, NF-kB1 (p105), TNF-alpha, NF-kB1 (p50)
38	Development_Regulation of epithelial-to-mesenchymal transition (EMT)	64	4.81166e-13	1.86602e-11	4.81166e-13	1.86602e-11	14	ACTA2, FGFR1, Bcl-2, MMP-9, Endothelin-1, PAI1, TGF-beta 1, RelA (p65 NF-kB subunit), PDGF-R-alpha, IL-1 beta, PDGF-R-beta, MMP-2, TNF-alpha, HGF receptor (Met)
39	Growth factors in regulation of oligodendrocyte precursor cells survival in multiple sclerosis	42	7.29545e-13	2.74353e-11	7.29545e-13	2.74353e-11	12	PI3K cat class IA, Caspase-3, Bcl-2, ErbB2, RelA (p65 NF-kB subunit), PDGF-R-alpha, p90Rsk, Fyn, Lyn, NFKBIA, TNF-alpha, Bax
40	Inhibition of apoptosis in pancreatic cancer	59	1.15918e-12	1.51853e-10	1.59797e-08	1.36765e-07	10	PI3K cat class IA, Casein kinase II, alpha chain (CSNK2A1), Bcl-2, ErbB2, ERK1/2, RelA (p65 NF-kB subunit), VEGF-A, IL-6, NFKBIA, Bax
41	Macrophage and dendritic cell phenotype shift in cancer	100	1.68114e-12	6.13616e-11	1.68114e-12	6.13616e-11	16	I-kB, NF-kB, iNOS, NF-kB p50/p50, NF-kB p50/p65, GSK3 beta, M-CSF receptor, TLR4, TGF-beta 1, IKK-gamma, RelA (p65 NF-kB subunit), IRE1, IL-1 beta, IL-6, TNF-alpha, HIF1A
42	p53 signaling in Prostate Cancer	33	1.86548e-12	2.03649e-10	0.0883838	0.1204	2	PI3K cat class IA, NK31
43	Immune response_Role of PKR in stress-induced antiviral cell response	57	1.89722e-12	6.72699e-11	1.89722e-12	6.72699e-11	13	Caspase-3, I-kB, NF-kB, NF-kB p50/p65, TLR4, ERK1/2, RelA (p65 NF-kB subunit), IL-1 beta, IL-6, PKR, c-Myc, NFKBIA, TNF-alpha
44	Immune response_Role of DPP4 (CD26) in immune regulation	47	3.22844e-12	1.11291e-10	3.22844e-12	1.11291e-10	12	I-kB, NF-kB, CD45, NF-kB p50/p65, Ubiquitin, TGF-beta 1, IKK-gamma, IL-6, Lck, Fyn, ZAP70, TNF-alpha
45	EGFR signaling pathway in lung cancer	53	3.76796e-12	3.79695e-10	3.02852e-10	4.69799e-09	11	PI3K cat class IA, NF-kB, Bcl-2, ErbB2, MMP-9, ERK1/2, VEGF-A, IL-6, NFKBIA, HGF receptor (Met), HIF1A
46	Immune response_IL-17 signaling pathways	60	3.84934e-12	1.29109e-10	3.84934e-12	1.29109e-10	13	MEK3(MAP2K3), PI3K cat class IA, I-kB, NF-kB, iNOS, GSK3 beta, MMP-9, ICAM1, ERK1/2, IKK-gamma, IL-1 beta, IL-6, CCL2
47	Chemokines in inflammation in adipose tissue and liver in obesity, type 2 diabetes and metabolic syndrome X	48	4.24851e-12	1.3519e-10	4.24851e-12	1.3519e-10	12	MIF, CD45, VCAM1, TLR4, ICAM1, CD34, IL-1 beta, IL-6, CCL2, PECAM1, TNF-alpha, P-selectin
48	Stimulation of TGF-beta signaling in lung cancer	48	4.24851e-12	1.3519e-10	4.24851e-12	1.3519e-10	12	I-kB, ACTA2, MMP-9, PAI1, TGF-beta 1, RelA (p65 NF-kB subunit), IL-1 beta, VEGF-A, TGF-beta, MMP-2, Fyn, PI3K cat class IA (p110-alpha)
49	Endothelin-1- and TNF-alpha-induced inflammatory response in asthmatic airway fibroblasts	20	4.8871e-12	1.47924e-10	4.8871e-12	1.47924e-10	9	NF-kB, NF-kB p50/p65, Endothelin-1, ICAM1, TGF-beta 1, RelA (p65 NF-kB subunit), IL-1 beta, IL-6, TNF-alpha
50	Possible regulation of HSF-1/ chaperone pathway in Huntington's disease	21	5.24672e-12	4.90943e-10	0.00369182	0.00736583	3	GSK3 alpha/beta, ERK1 (MAPK3), HSP70
51	Activation of TNF-alpha-dependent pro-tumoral effect in colorectal cancer	49	5.5531e-12	1.64081e-10	5.5531e-12	1.64081e-10	12	I-kB, NF-kB, NF-kB p50/p65, VCAM1, ICAM1, ERK1/2, IKK-gamma, RelA (p65 NF-kB subunit), IL-6, CCL2, TNF-alpha, NF-kB1 (p50)
52	Immune response_IL-5 signaling via PI3K, MAPK and NF-kB	76	5.90363e-12	1.70382e-10	5.90363e-12	1.70382e-10	14	PI3K cat class IA, NF-kB, ITGB2, Syk, NF-kB p50/p65, GSK3 beta, MMP-9, ICAM1, ERK1/2, MMP-2, Fyn, Lyn, NFKBIA, Bax
53	Translation _Regulation of EIF2 activity	39	7.99891e-12	2.25606e-10	7.99891e-12	2.25606e-10	11	PI3K cat class IA, eIF2AK3, Casein kinase II, alpha chains, eIF2AK1, GSK3 alpha/beta, DYRK1a, ERK1/2, GCN2, Casein kinase I, PKR, Insulin processed
54	Stem cells_Inflammatory response in ischemia-reperfusion injury during myocardial infarction	21	8.44194e-12	2.3281e-10	8.44194e-12	2.3281e-10	9	NF-kB, TLR4, ICAM1, IL-1 beta, IL-6, CCL2, HSP70, TNF-alpha, P-selectin
55	Signal transduction_PTEN pathway	46	8.73893e-12	6.95133e-10	0.00501499	0.009649	4	PI3K cat class IA, Caspase-3, GSK3 beta, ERK1/2
56	Myeloid-derived suppressor cells and M2 macrophages in cancer	64	9.28661e-12	2.4064e-10	9.28661e-12	2.4064e-10	13	NF-kB, iNOS, CAT-2, M-CSF receptor, TLR4, Calgranulin A, TGF-beta 1, Calgranulin B, VEGFR-1, IL-1 beta, VEGF-A, IL-6, HIF1A
57	Immune response_NF-AT in immune response	51	9.30759e-12	2.4064e-10	9.30759e-12	2.4064e-10	12	PI3K cat class IA, I-kB, NF-kB, Syk, GSK3 alpha/beta, NF-AT3(NFATC4), IKK-gamma, Lck, Lyn, ZAP70, PKC-theta, NF-AT
58	Some pathways of EMT in cancer cells	51	9.30759e-12	2.4064e-10	9.30759e-12	2.4064e-10	12	c-Abl, PI3K cat class IA, I-kB, PDGF receptor, Bcl-2, GSK3 beta, Endothelin-1, TGF-beta 1, RelA (p65 NF-kB subunit), PDGF-R-alpha, PDGF-R-beta, TNF-alpha
59	Transcription_HIF-1 targets	95	1.04571e-11	2.64842e-10	1.04571e-11	2.64842e-10	15	iNOS, MMP-9, Endothelin-1, PAI1, LDHA, TGF-beta 1, CTGF, VEGFR-1, VEGF-A, Leptin, c-Myc, Angiopoietin 2, MMP-2, HGF receptor (Met), HIF1A
60	Noise-induced hair cell death and spiral ganglion neuron degeneration	96	1.22322e-11	2.9765e-10	1.22322e-11	2.9765e-10	15	Caspase-3, iNOS, TrkB, AMPK alpha subunit, IL-1 beta, IL-6, TrkC, CCL2, RET, CCL13, PI3K cat class IA (p110-alpha), TNF-alpha, Actin, GDNF, Bax
61	Mechanisms of drug resistance in SCLC	70	1.69626e-11	1.2345e-09	4.86198e-10	7.09848e-09	12	PI3K cat class IA, Caspase-3, c-Kit, Bcl-2, HSPA1A, GSK3 beta, VCAM1, ERK1/2, RelA (p65 NF-kB subunit), VEGF-A, HSP70, Bax
62	Disruption of apoptosis, proliferation and shedding of epithelial cells in asthma	54	1.93345e-11	4.43192e-10	1.93345e-11	4.43192e-10	12	Caspase-3, NF-kB, Bcl-2, IL-1 alpha, MMP-9, Endothelin-1, ICAM1, TGF-beta 1, ERK1/2, IL-1 beta, eNOS, TNF-alpha
63	Immune response_CCL2 signaling	54	1.93345e-11	4.43192e-10	1.93345e-11	4.43192e-10	12	NF-kB, iNOS, IL-1 alpha, ICAM1, ERK1/2, IL-1 beta, VEGF-A, IL-6, CCL2, MMP-2, TNF-alpha, HIF1A
64	IL-1 signaling in melanoma	42	1.96419e-11	4.43192e-10	1.96419e-11	4.43192e-10	11	I-kB, NF-kB, iNOS, IL-1 alpha, MMP-9, VCAM1, ICAM1, IL-1 beta, VEGF-A, IL-6, CCL2
65	TNF-alpha, IL-1 beta induce dyslipidemia and inflammation in obesity and type 2 diabetes in adipocytes	42	1.96419e-11	4.43192e-10	1.96419e-11	4.43192e-10	11	NF-kB, iNOS, PAI1, ERK1/2, IL-1 beta, IL-6, CCL2, eNOS, NFKBIA, TNF-alpha, NF-kB1 (p50)
66	Role of alpha-V/ beta-6 integrin in colorectal cancer	23	2.2868e-11	5.06771e-10	2.2868e-11	5.06771e-10	9	Caspase-3, Bcl-2, MMP-9, TGF-beta 1, ERK1/2, PKC, ERK2 (MAPK1), MMP-2, Bax
67	Development_PDGF signaling via STATs and NF-kB	32	2.33393e-11	5.08141e-10	2.33393e-11	5.08141e-10	10	PI3K cat class IA, I-kB, NF-kB, PDGF receptor, RelA (p65 NF-kB subunit), PDGF-R-alpha, PKR, PDGF-R-beta, c-Myc, NF-kB p65/p65
68	Immune response_CD28 signaling	55	2.4408e-11	5.22246e-10	2.4408e-11	5.22246e-10	12	PI3K cat class IA, I-kB, NF-kB, NF-AT3(NFATC4), GSK3 beta, PIP5KI, IKK-gamma, Lck, Fyn, ZAP70, PKC-theta, NF-AT
69	Role of cell adhesion in vaso-occlusion in Sickle cell disease	43	2.60505e-11	5.47943e-10	2.60505e-11	5.47943e-10	11	ITGB2, CD45, NF-kB p50/p65, IL-1 alpha, VCAM1, ICAM1, CD63, IL-1 beta, PECAM1, TNF-alpha, P-selectin
70	Survival pathways in Prostate Cancer	50	2.82196e-11	1.84838e-09	2.93814e-09	3.11643e-08	10	PI3K cat class IA, I-kB, NF-kB, ERK1 (MAPK3), Bcl-2, GSK3 beta, ERK2 (MAPK1), IL-6, CCL2, Bax
71	The role of PTEN and PI3K signaling in melanoma	50	2.82196e-11	1.84838e-09	0.00675524	0.0123465	4	PI3K cat class IA, Caspase-3, GSK3 beta, PI3K cat class IA (p110-alpha)
72	Interaction of deficient alpha-MSH signaling with TNF-alpha in melanoma	33	3.30523e-11	6.83633e-10	3.30523e-11	6.83633e-10	10	NF-kB, Catalase, NF-kB p50/p65, GPX1, MMP-9, ICAM1, RelA (p65 NF-kB subunit), NFKBIA, TNF-alpha, NF-kB1 (p50)
73	Regulation of angiogenesis in prostate cancer	51	3.71533e-11	2.31766e-09	3.60738e-09	3.73063e-08	10	PI3K cat class IA, NF-kB p50/p65, IL-1 alpha, MMP-9, TGF-beta 1, VEGFR-1, VEGF-A, CCL2, TNF-alpha, HIF1A
74	Development_EGFR signaling pathway	71	3.74704e-11	7.62308e-10	3.74704e-11	7.62308e-10	13	PI3K cat class IA, I-kB, NF-kB, ERK1 (MAPK3), ErbB2, GSK3 beta, MMP-9, ERK1/2, ERK2 (MAPK1), c-Myc, MMP-2, Bax, PKC-theta
75	Immune response_Fc epsilon RI pathway: Lyn-mediated cytokine production	87	4.02177e-11	8.05002e-10	4.02177e-11	8.05002e-10	14	MEK3(MAP2K3), NF-kB, Syk, NF-kB p50/p65, ERK1/2, IKK-gamma, PKC, IL-1 beta, IL-6, CCL2, Lyn, NFKBIA, TNF-alpha, NF-AT
76	Immune response_TLR5, TLR7, TLR8 and TLR9 signaling pathways	58	4.76996e-11	9.39607e-10	4.76996e-11	9.39607e-10	12	MEK3(MAP2K3), PI3K cat class IA, I-kB, NF-kB, IRAK4, Ubiquitin, ERK1/2, IKK-gamma, IL-1 beta, NF-kB1 (p105), IL-6, TNF-alpha
77	Signal transduction_CXCR4 signaling via PI3K cascade	46	5.80924e-11	1.12645e-09	5.80924e-11	1.12645e-09	11	PI3K cat class IA, Caspase-3, GSK3 beta, Ubiquitin, RelA (p65 NF-kB subunit), SGK1, VEGF-A, IL-6, eNOS, NFKBIA, NF-kB1 (p50)
78	Interleukins-induced inflammatory response in asthmatic airway fibroblasts	35	6.38641e-11	1.20084e-09	6.38641e-11	1.20084e-09	10	NF-kB, NF-kB p50/p65, IL-1 alpha, VCAM1, ICAM1, ERK1/2, RelA (p65 NF-kB subunit), IL-1 beta, IL-6, CCL2
79	Th2 cytokine- and TNF-alpha-induced inflammatory response in asthmatic airway fibroblasts	35	6.38641e-11	1.20084e-09	6.38641e-11	1.20084e-09	10	NF-kB, NF-kB p50/p65, VCAM1, ICAM1, TGF-beta 1, ERK1/2, RelA (p65 NF-kB subunit), IL-6, CCL2, TNF-alpha
80	Signal transduction_AKT signaling	43	6.65806e-11	3.63419e-09	3.25539e-06	1.448e-05	7	PI3K cat class IA, I-kB, NF-kB, GSK3 alpha/beta, c-Myc, HGF receptor (Met), Bax
81	Muscle contraction_Regulation of eNOS activity in endothelial cells	65	7.58973e-11	3.97702e-09	0.000431745	0.0011002	6	PI3K cat class IA, NF-kB p50/p65, Endothelin-1, VEGF-A, eNOS, HIF1A
82	Immune response_HMGB1/TLR signaling pathway	36	8.72803e-11	1.61664e-09	8.72803e-11	1.61664e-09	10	MEK3(MAP2K3), I-kB, IRAK4, Ubiquitin, TLR4, IKK-gamma, RelA (p65 NF-kB subunit), IL-1 beta, IL-6, TNF-alpha
83	Immune response_B cell antigen receptor (BCR) pathway	110	9.15038e-11	1.66994e-09	9.15038e-11	1.66994e-09	15	MEK3(MAP2K3), NF-kB, Syk, GSK3 alpha/beta, NF-kB p50/p65, GSK3 beta, VCAM1, PIP5KI, ICAM1, ERK1/2, IKK-gamma, RelA (p65 NF-kB subunit), Lyn, NFKBIA, NF-kB1 (p50)
84	Muscle contraction_Relaxin signaling pathway	48	9.58479e-11	1.72387e-09	9.58479e-11	1.72387e-09	11	I-kB, NF-kB, iNOS, MMP-9, Endothelin-1, ERK1/2, VEGF-A, p90Rsk, eNOS, MMP-2, NFKBIA
85	Immune response_IL-3 signaling via JAK/STAT, p38, JNK and NF-kB	93	1.01938e-10	1.80721e-09	1.01938e-10	1.80721e-09	14	MEK3(MAP2K3), PI3K cat class IA, I-kB, NF-kB, NF-kB p50/p65, Bcl-2, Pim-1, ICAM1, IKK-gamma, IRE1, IL-6, c-Myc, Lyn, P-selectin
86	Immune response_IL-10 signaling pathway	62	1.09637e-10	1.91633e-09	1.09637e-10	1.91633e-09	12	PI3K cat class IA, NF-kB, iNOS, NF-kB p50/p65, Bcl-2, IL-1 alpha, MMP-9, ICAM1, IL-1 beta, IL-6, TNF-alpha, NF-kB1 (p50)
87	Apo-2L(TNFSF10)-induced apoptosis in melanoma	45	1.20146e-10	5.82929e-09	1.8633e-08	1.58381e-07	9	Caspase-3, NF-kB, NF-kB p50/p65, IKK-gamma, RelA (p65 NF-kB subunit), IRE1, NFKBIA, NF-kB1 (p50), Bax
88	IGF-1 signaling in pancreatic cancer	36	1.41783e-10	6.63342e-09	1.46243e-05	5.36946e-05	6	PI3K cat class IA, MMP-9, ERK1/2, VEGF-A, MMP-2, HIF1A
89	Chemotaxis_SDF-1/ CXCR4-induced chemotaxis of immune cells	79	1.5324e-10	2.55411e-09	1.5324e-10	2.55411e-09	13	PI3K cat class IA, ITGB2, CD45, SFK, VCAM1, PAK, ICAM1, ERK1/2, Lck, Fyn, ZAP70, PIPKI gamma, PAK2
90	Angiogenesis in HCC	50	1.54358e-10	2.55411e-09	1.54358e-10	2.55411e-09	11	NF-kB, MMP-9, TGF-beta 1, VEGFR-1, VEGF-A, Leptin, CCL2, Angiopoietin 2, MMP-2, NF-kB1 (p50), HIF1A
91	PDE4 regulation of cyto/chemokine expression in inflammatory skin diseases	50	1.54358e-10	2.55411e-09	1.54358e-10	2.55411e-09	11	iNOS, NF-kB p50/p50, NF-kB p50/p65, ERK1/2, RelA (p65 NF-kB subunit), IL-1 beta, IL-6, CCL2, NFKBIA, TNF-alpha, NF-kB1 (p50)
92	MAPK-independent proliferation of normal and asthmatic smooth muscle cells	64	1.62373e-10	2.65138e-09	1.62373e-10	2.65138e-09	12	PI3K cat class IA, I-kB, NF-kB, PDGF receptor, FGFR1, ErbB2, Endothelin-1, TGF-beta 1, PDGF-R-alpha, PDGF-R-beta, c-Myc, PLAT (TPA)
93	Release of pro-inflammatory mediators and elastolytic enzymes by alveolar macrophages in COPD	28	1.81117e-10	2.91905e-09	1.81117e-10	2.91905e-09	9	NF-kB p50/p65, MMP-9, TLR4, RelA (p65 NF-kB subunit), IL-1 beta, IL-6, CCL2, MMP-2, TNF-alpha
94	TNF-alpha and IL-1 beta-mediated regulation of contraction and secretion of inflammatory factors in normal and asthmatic airway smooth muscle	65	1.96543e-10	3.08746e-09	1.96543e-10	3.08746e-09	12	NF-kB, NF-kB p50/p65, MMP-9, VCAM1, ERK1/2, RelA (p65 NF-kB subunit), IL-1 beta, IL-6, PDGF-R-beta, CCL2, NFKBIA, TNF-alpha
95	Renal tubulointerstitial injury in Lupus Nephritis	65	1.96543e-10	3.08746e-09	1.96543e-10	3.08746e-09	12	I-kB, NF-kB p50/p65, PAI1, VCAM1, M-CSF receptor, ICAM1, TGF-beta 1, RelA (p65 NF-kB subunit), IL-1 beta, IL-6, CCL2, TNF-alpha
96	Proteolysis_Putative SUMO-1 pathway	29	2.55897e-10	1.15595e-08	0.00928566	0.0163919	3	NF-kB, Ubiquitin, NFKBIA
97	EGFR signaling pathway in colorectal cancer	60	3.39106e-10	1.38821e-08	3.04128e-06	1.37746e-05	8	I-kB, NF-kB, ErbB2, GSK3 beta, ERK1/2, RelA (p65 NF-kB subunit), p90Rsk, PI3K cat class IA (p110-alpha)
98	Pro-oncogenic action of Estradiol/ Estrogen receptors in ovarian cancer	60	3.39106e-10	1.38821e-08	3.04128e-06	1.37746e-05	8	PI3K cat class IA, I-kB, NF-kB p50/p65, MMP-9, RelA (p65 NF-kB subunit), ERK2 (MAPK1), Leptin, c-Myc
99	Fibroblast/ myofibroblast proliferation in asthmatic airways	41	3.60628e-10	5.52518e-09	3.60628e-10	5.52518e-09	10	PI3K cat class IA, NF-kB, FGFR1, Endothelin-1, TGF-beta 1, CTGF, ERK1/2, PKC, PDGF-R-alpha, IL-1 beta
100	Inter-cellular relations in COPD (general schema)	30	3.65546e-10	5.53222e-09	3.65546e-10	5.53222e-09	9	NF-kB p50/p65, MMP-9, CTGF, RelA (p65 NF-kB subunit), IL-1 beta, IL-6, TGF-beta, CCL2, TNF-alpha
101	Cell adhesion_PLAU signaling	39	3.73508e-10	1.48271e-08	2.3593e-05	8.04364e-05	6	PI3K cat class IA, Casein kinase II, alpha chains, PAI1, ERK1/2, PLAT (TPA), HGF receptor (Met)
102	ERBB family and HGF signaling in gastric cancer	54	3.7538e-10	5.61261e-09	3.7538e-10	5.61261e-09	11	MEK3(MAP2K3), PI3K cat class IA, ERK1 (MAPK3), ErbB2, GSK3 beta, ERK1/2, VEGF-A, ERK2 (MAPK1), c-Myc, HGF receptor (Met), HIF1A
103	Apoptosis and survival_NO synthesis and signaling	55	4.63123e-10	6.84209e-09	4.63123e-10	6.84209e-09	11	NF-kB, iNOS, NF-kB p50/p50, NF-kB p50/p65, TGF-beta 1, ERK1/2, IL-1 beta, NF-kB p65/p65, eNOS, nNOS, TNF-alpha
104	Glucocorticoid-induced elevation of intraocular pressure as glaucoma risk factor	62	5.24742e-10	2.0218e-08	3.9022e-05	0.000128452	7	PI3K cat class IA, Alpha-actinin, FGFR1, PAI1, MMP-2, PLAT (TPA), HGF receptor (Met)
105	MAPK-mediated proliferation of normal and asthmatic smooth muscle cells	56	5.68836e-10	8.20843e-09	5.68836e-10	8.20843e-09	11	PDGF receptor, FGFR1, ErbB2, Endothelin-1, PAI1, TGF-beta 1, ERK1/2, PDGF-R-alpha, PDGF-R-beta, p90Rsk, PLAT (TPA)
106	IL-6 signaling in multiple myeloma	51	5.91193e-10	2.21275e-08	0.000112086	0.000327292	6	PI3K cat class IA, GSK3 beta, ERK1/2, VEGF-A, IL-6, Lyn
107	Environmental factors-induced inflammatory signaling in normal and asthmatic airway epithelium	43	6.00864e-10	8.57095e-09	6.00864e-10	8.57095e-09	10	NF-kB, iNOS, ICAM1, ERK1/2, PKC, IL-1 beta, IL-6, eNOS, TNF-alpha, sICAM1
108	Skeletal muscle atrophy in COPD	57	6.95696e-10	9.73637e-09	6.95696e-10	9.73637e-09	11	I-kB, iNOS, NF-kB p50/p65, GSK3 beta, KCRM, ERK1/2, RelA (p65 NF-kB subunit), ERK2 (MAPK1), Desmin, NFKBIA, TNF-alpha
109	The role of KEAP1/NRF2 pathway in skin sensitization	32	6.98257e-10	9.73637e-09	6.98257e-10	9.73637e-09	9	NF-kB, ERK1 (MAPK3), Ubiquitin, TLR4, ERK1/2, IL-1 beta, ERK2 (MAPK1), HSP70, TNF-alpha
110	Role of TLR signaling in skin sensitization	44	7.67506e-10	1.04668e-08	7.67506e-10	1.04668e-08	10	MEK3(MAP2K3), I-kB, IRAK4, NF-kB p50/p65, TLR4, IKK-gamma, IL-1 beta, IL-6, HSP70, TNF-alpha
111	Release of pro-inflammatory factors and proteases by alveolar macrophages in asthma	44	7.67506e-10	1.04668e-08	7.67506e-10	1.04668e-08	10	NF-kB, iNOS, NF-kB p50/p65, MMP-9, Endothelin-1, TLR4, IL-1 beta, IL-6, CCL2, TNF-alpha
112	Immune response_IL-2 signaling via ERK, PI3K, and PLC-gamma	73	8.07814e-10	1.07795e-08	8.07814e-10	1.07795e-08	12	PI3K cat class IA, NF-kB, Syk, ERK1 (MAPK3), Bcl-2, ERK1/2, ERK2 (MAPK1), c-Myc, Lck, Fyn, Lyn, PKC-theta
113	Regulation and signaling of HGF receptor (Met) and MSP receptor (RON) in lung cancer	73	8.07814e-10	1.07795e-08	8.07814e-10	1.07795e-08	12	MEK3(MAP2K3), PI3K cat class IA, GSK3 beta, MMP-9, ERK1/2, IL-1 beta, VEGF-A, IL-6, p90Rsk, MMP-2, HGF receptor (Met), HIF1A
114	TGF-beta signaling via kinase cascades in breast cancer	58	8.47355e-10	1.09538e-08	8.47355e-10	1.09538e-08	11	MEK3(MAP2K3), MMP-9, PAI1, Ubiquitin, TGF-beta 1, ERK1/2, RelA (p65 NF-kB subunit), MMP-2, NFKBIA, TNF-alpha, NF-kB1 (p50)
115	Immune response_TCR alpha/beta signaling pathway	58	8.47355e-10	1.09538e-08	8.47355e-10	1.09538e-08	11	I-kB, NF-kB, CD45, NF-AT3(NFATC4), Ubiquitin, ERK1/2, IKK-gamma, Lck, Fyn, ZAP70, PKC-theta
116	Role of B cells in SLE	58	8.47355e-10	1.09538e-08	8.47355e-10	1.09538e-08	11	PI3K cat class IA, NF-kB, CD45, Syk, NF-kB p50/p50, Bcl-2, ICAM1, IL-6, Lyn, TNF-alpha, NF-kB1 (p50)
117	Regulation of VEGF expression in lung cancer	53	9.5616e-10	3.20656e-08	5.36315e-09	5.28228e-08	10	PI3K cat class IA, NF-kB, c-Kit, ErbB2, ERK1/2, IL-1 beta, VEGF-A, IL-6, MMP-2, HIF1A
118	IL-6 signaling in breast cancer cells	53	9.5616e-10	3.20656e-08	1.37119e-05	5.09475e-05	7	PI3K cat class IA, Bcl-2, ERK1/2, RelA (p65 NF-kB subunit), IL-6, c-Myc, NF-kB1 (p50)
119	Development_Role of IL-8 in angiogenesis	65	9.79101e-10	3.20656e-08	5.62601e-06	2.32729e-05	8	PI3K cat class IA, I-kB, NF-kB, Ubiquitin, ERK1/2, IKK-gamma, VEGF-A, FASN
120	Role of Tissue factor-induced Thrombin signaling in cancerogenesis	65	9.79101e-10	3.19651e-08	3.03939e-09	3.19651e-08	11	ERK1 (MAPK3), NF-kB p50/p65, ErbB2, ERK1/2, RelA (p65 NF-kB subunit), VEGFR-1, VEGF-A, ERK2 (MAPK1), MMP-2, PI3K cat class IA (p110-alpha), P-selectin
121	Regulation of AKT(PKB)/ GSK3 beta cascade in bipolar disorder	54	1.20603e-09	3.85342e-08	0.000154834	0.000434725	6	PI3K cat class IA, FGFR1, GSK3 beta, TrkB, RET, GDNF
122	IGF family signaling in colorectal cancer	60	1.2424e-09	1.5574e-08	1.2424e-09	1.5574e-08	11	I-kB, NF-kB, GSK3 alpha/beta, ERK1 (MAPK3), GSK3 beta, ERK1/2, RelA (p65 NF-kB subunit), VEGF-A, ERK2 (MAPK1), PI3K cat class IA (p110-alpha), HIF1A
123	Development_PDGF signaling via MAPK cascades	60	1.2424e-09	1.5574e-08	1.2424e-09	1.5574e-08	11	c-Abl, MEK3(MAP2K3), PDGF receptor, MMP-9, ERK1/2, PDGF-R-alpha, IL-6, PDGF-R-beta, c-Myc, p90Rsk, MMP-2
124	Development_Regulation of endothelial progenitor cell differentiation from adult stem cells	60	1.2424e-09	1.5574e-08	1.2424e-09	1.5574e-08	11	PI3K cat class IA, c-Kit, MMP-9, VCAM1, M-CSF receptor, ICAM1, CD34, VEGF-A, eNOS, PI3K cat class IA (p110-alpha), P-selectin
125	Aminoglycoside- and cisplatin-induced hair cell death	112	1.28686e-09	1.59699e-08	1.28686e-09	1.59699e-08	14	Caspase-3, NF-kB, iNOS, Bcl-2, NF-AT3(NFATC4), GSK3 beta, ERK1/2, NOL3, PKC, RelA (p65 NF-kB subunit), IL-1 beta, IL-6, TNF-alpha, Bax
126	Immune response_IL-9 signaling pathway	61	1.49602e-09	1.83818e-08	1.49602e-09	1.83818e-08	11	PI3K cat class IA, Bcl-2, VCAM1, Pim-1, TGF-beta 1, ERK1/2, VEGF-A, CCL2, c-Myc, CCL13, p90Rsk
127	Apoptosis and survival_Role of CDK5 in neuronal death and survival	34	1.52337e-09	4.75146e-08	1.0354e-05	4.04067e-05	6	PI3K cat class IA, Caspase-3, Bcl-2, ErbB2, ERK1/2, Bax
128	Mitogenic action of ESR1 (membrane) in breast cancer	47	1.54019e-09	1.8739e-08	1.54019e-09	1.8739e-08	10	ErbB2, GSK3 beta, MMP-9, ATR, ERK1/2, SGK1, ERK2 (MAPK1), c-Myc, MMP-2, PI3K cat class IA (p110-alpha)
129	Plasminogen activators signaling in pancreatic cancer	35	1.69053e-09	2.03684e-08	1.69053e-09	2.03684e-08	9	IL-1 alpha, MMP-9, PAI1, TGF-beta 1, ERK1/2, RelA (p65 NF-kB subunit), MMP-2, PLAT (TPA), HGF receptor (Met)
130	Role of FSH and Lutropin in ovarian cancer	56	1.88954e-09	5.75651e-08	1.38104e-07	9.21438e-07	9	ErbB2, MMP-9, ERK1/2, VEGF-A, IL-6, c-Myc, MMP-2, PI3K cat class IA (p110-alpha), HIF1A
131	Immune response_C3a signaling	48	1.92028e-09	2.29141e-08	1.92028e-09	2.29141e-08	10	NF-kB p50/p65, TGF-beta 1, ERK1/2, RelA (p65 NF-kB subunit), IL-1 beta, VEGF-A, IL-6, CCL2, NFKBIA, TNF-alpha
132	Immune response_TNF-R2 signaling pathways	45	2.01726e-09	6.00592e-08	3.10772e-07	1.81919e-06	8	PI3K cat class IA, I-kB, NF-kB, NF-kB p50/p65, Bcl-2, ERK1/2, RelA (p65 NF-kB subunit), TNF-alpha
133	CHDI_Correlations from Replication data_Causal network (positive correlations)	79	2.07981e-09	2.45813e-08	2.07981e-09	2.45813e-08	12	MEK3(MAP2K3), PI3K cat class IA, Caspase-3, I-kB, NF-kB, CD45, IL-1 alpha, ICAM1, Lck, HSP70, ZAP70, PKC-theta
134	IL-6 signaling pathway in lung cancer	35	2.09257e-09	6.09172e-08	3.85995e-08	2.97528e-07	8	MEK3(MAP2K3), PI3K cat class IA, I-kB, NF-kB, ERK1/2, VEGF-A, IL-6, HIF1A
135	Cigarette smoke-induced inflammatory signaling in airway epithelial cells	36	2.22495e-09	2.60487e-08	2.22495e-09	2.60487e-08	9	NF-kB p50/p65, ICAM1, ERK1/2, RelA (p65 NF-kB subunit), IL-1 beta, IL-6, NFKBIA, TNF-alpha, sICAM1
136	Development_Cytokine-mediated regulation of megakaryopoiesis	57	2.34803e-09	6.68678e-08	1.61885e-07	1.05737e-06	9	PI3K cat class IA, NF-kB, GSK3 beta, IL-1 alpha, ERK1/2, FLT3, IL-1 beta, IL-6, c-Myc
137	Immune response_MIF-induced cell adhesion, migration and angiogenesis	49	2.38138e-09	2.73638e-08	2.38138e-09	2.73638e-08	10	PI3K cat class IA, NF-kB, CD74, MIF, MMP-9, VCAM1, ICAM1, ERK1/2, VEGF-A, CCL2
138	Signal transduction_Soluble CXCL16 signaling	49	2.38138e-09	2.73638e-08	2.38138e-09	2.73638e-08	10	I-kB, NF-kB, MMP-9, ERK1/2, IKK-gamma, VEGF-A, MMP-2, TNF-alpha, P-selectin, HIF1A
139	Signal transduction_Angiotensin II/ AGTR1 signaling via p38, ERK and PI3K	98	2.43165e-09	2.76851e-08	2.43165e-09	2.76851e-08	13	PI3K cat class IA, Syk, Catalase, CYP11B2, PAI1, TLR4, ERK1/2, IL-6, PDGF-R-beta, CCL2, MMP-2, Fyn, SOD3 (EC-SOD)
140	Oxidative stress in adipocyte dysfunction in type 2 diabetes and metabolic syndrome X	64	2.55829e-09	2.88622e-08	2.55829e-09	2.88622e-08	11	PI3K cat class IA, Catalase, GPX1, PAI1, RelA (p65 NF-kB subunit), IL-6, CCL2, Insulin processed, NFKBIA, TNF-alpha, NF-kB1 (p50)
141	IL-1 production in melanoma	17	2.7373e-09	3.06035e-08	2.7373e-09	3.06035e-08	7	I-kB, NF-kB, NF-kB p50/p65, IL-1 alpha, ERK1/2, RelA (p65 NF-kB subunit), IL-1 beta
142	Development_GM-CSF signaling	50	2.93814e-09	3.11643e-08	2.93814e-09	3.11643e-08	10	PI3K cat class IA, Caspase-3, I-kB, NF-kB, Bcl-2, Pim-1, ERK1/2, CCL2, c-Myc, Lyn
143	TGF-beta 1-induced transactivation of membrane receptors signaling in HCC	50	2.93814e-09	3.11643e-08	2.93814e-09	3.11643e-08	10	c-Abl, PI3K cat class IA, PDGF receptor, GSK3 beta, TGF-beta 1, PDGF-R-alpha, PDGF-R-beta, TGF-beta, c-Myc, Actin
144	IGF-1 signaling in multiple myeloma	50	2.93814e-09	3.11643e-08	2.93814e-09	3.11643e-08	10	PI3K cat class IA, I-kB, NF-kB, GSK3 alpha/beta, ERK1 (MAPK3), ERK1/2, VEGF-A, ERK2 (MAPK1), PRKD1, HIF1A
145	Immune response_C5a signaling	50	2.93814e-09	3.11643e-08	2.93814e-09	3.11643e-08	10	I-kB, NF-kB, NF-kB p50/p65, Bcl-2, PAI1, ERK1/2, PKC, IL-1 beta, p90Rsk, TNF-alpha
146	IgE- and MGF-induced Lyn-mediated production of cytokines and arachidonic acid metabolites in lung mast cells in asthma	50	2.93814e-09	3.11643e-08	2.93814e-09	3.11643e-08	10	I-kB, NF-kB, c-Kit, Syk, GSK3 beta, ERK1/2, CCL2, Fyn, Lyn, TNF-alpha
147	Transcription_Role of VDR in regulation of genes involved in osteoporosis	59	3.57684e-09	9.37131e-08	0.0120249	0.020555	4	IL-1 alpha, IL-1 beta, IL-6, TNF-alpha
148	HIF-1 in gastric cancer	51	3.60738e-09	3.73063e-08	3.60738e-09	3.73063e-08	10	Bcl-2, ErbB2, PAI1, Ubiquitin, LDHA, ERK1/2, VEGF-A, PI3K cat class IA (p110-alpha), Bax, HIF1A
149	TNF-alpha-induced inflammatory signaling in normal and asthmatic airway epithelium	38	3.75376e-09	3.84993e-08	3.75376e-09	3.84993e-08	9	I-kB, NF-kB, NF-kB p50/p65, ICAM1, ERK1/2, IL-6, CCL2, NFKBIA, TNF-alpha
150	HGF signaling in pancreatic cancer	28	4.24577e-09	1.04943e-07	1.44815e-07	9.50878e-07	7	PI3K cat class IA, MMP-9, ERK1/2, c-Myc, MMP-2, HGF receptor (Met), HIF1A
151	Signal transduction_Activation of PKC via G-Protein coupled receptor	52	4.40838e-09	4.44781e-08	4.40838e-09	4.44781e-08	10	c-Abl, I-kB, NF-kB, NF-AT3(NFATC4), GSK3 beta, ERK1/2, IKK-gamma, PRKD1, PKC-lambda/iota, PKC-theta
152	IGF signaling in HCC	52	4.40838e-09	4.44781e-08	4.40838e-09	4.44781e-08	10	PI3K cat class IA, GSK3 beta, MMP-9, TGF-beta 1, ERK1/2, PKC, VEGF-A, MMP-2, HGF receptor (Met), HIF1A
153	CHDI_Correlations from Discovery data_Causal network	73	4.41178e-09	1.05081e-07	1.35198e-05	5.09475e-05	8	PI3K cat class IA, Syk, GSK3 beta, ERK1/2, PDGF-R-alpha, CCL2, c-Myc, p90Rsk
154	Apoptosis and survival_Role of PKR in stress-induced apoptosis	53	5.36315e-09	5.28228e-08	5.36315e-09	5.28228e-08	10	Caspase-3, I-kB, NF-kB, NF-kB p50/p65, TLR4, ERK1/2, PKR, c-Myc, NFKBIA, TNF-alpha
155	Signal transduction_CXCR4 signaling via MAPKs cascades	53	5.36315e-09	5.28228e-08	5.36315e-09	5.28228e-08	10	Ubiquitin, PAK, CTGF, ERK1/2, RelA (p65 NF-kB subunit), IL-6, p90RSK2(RPS6KA3), NFKBIA, ZAP70, NF-kB1 (p50)
156	Glucocorticoids-mediated inhibition of pro-constrictory and pro-inflammatory signaling in airway smooth muscle cells	49	5.36474e-09	1.23295e-07	6.17552e-07	3.39107e-06	8	NF-kB, NF-kB p50/p65, ERK1/2, RelA (p65 NF-kB subunit), IL-1 beta, IL-6, NFKBIA, TNF-alpha
157	Apoptosis and survival_nAChR in apoptosis inhibition and cell cycle progression	29	6.04121e-09	1.36448e-07	0.000890747	0.00209756	4	PI3K cat class IA, GSK3 alpha/beta, GSK3 beta, Fyn
158	Immune response_MIF in innate immunity response	40	6.13517e-09	5.99508e-08	6.13517e-09	5.99508e-08	9	I-kB, IRAK4, iNOS, MIF, NF-kB p50/p65, TLR4, IL-1 beta, IL-6, TNF-alpha
159	Development_Role of HGF in hematopoietic stem cell mobilization	21	6.71346e-09	1.46642e-07	4.91801e-07	2.74921e-06	6	PI3K cat class IA, MMP-9, SGK1, MMP-2, HGF receptor (Met), HIF1A
160	Resistance of melanoma cells to Apo-2L(TNFSF10)-induced apoptosis	39	6.71642e-09	1.46642e-07	2.3593e-05	8.04364e-05	6	PI3K cat class IA, Caspase-3, Bcl-2, ERK1/2, RelA (p65 NF-kB subunit), Bax
161	Role of IL-8 in colorectal cancer	19	6.91317e-09	6.70254e-08	6.91317e-09	6.70254e-08	7	PI3K cat class IA, ICAM1, ERK1/2, IL-1 beta, MMP-2, TNF-alpha, HGF receptor (Met)
162	Cigarette smoke-mediated attenuation of antibacterial and antivirus immune response	29	7.60557e-09	7.24003e-08	7.60557e-09	7.24003e-08	8	TLR4, ICAM1, RelA (p65 NF-kB subunit), IL-1 beta, IL-6, NFKBIA, TNF-alpha, sICAM1
163	Main growth factor signaling cascades in multiple myeloma cells	41	7.75926e-09	7.24003e-08	7.75926e-09	7.24003e-08	9	PI3K cat class IA, I-kB, NF-kB, GSK3 alpha/beta, ERK1 (MAPK3), VEGFR-1, VEGF-A, ERK2 (MAPK1), HIF1A
164	Pro-tumoral TNF-alpha signaling in melanoma	41	7.75926e-09	7.24003e-08	7.75926e-09	7.24003e-08	9	PI3K cat class IA, NF-kB, NF-kB p50/p65, MMP-9, VCAM1, Angiopoietin 2, MMP-2, NFKBIA, TNF-alpha
165	Maturation and migration of dendritic cells in skin sensitization	41	7.75926e-09	7.24003e-08	7.75926e-09	7.24003e-08	9	MEK3(MAP2K3), I-kB, NF-kB, ICAM1, ERK1/2, IL-1 beta, IL-6, GCK(MAP4K2), TNF-alpha
166	Apoptosis and survival_Phosphorylation in TNF-alpha-induced NF-kB signaling	41	7.75926e-09	7.24003e-08	7.75926e-09	7.24003e-08	9	PI3K cat class IA, Casein kinase II, alpha chain (CSNK2A1), NF-kB p50/p65, Pim-1, IKK-gamma, RelA (p65 NF-kB subunit), NF-kB p65/p65, NFKBIA, TNF-alpha
167	Tau pathology in Alzheimer disease	55	7.83754e-09	7.2585e-08	7.83754e-09	7.2585e-08	10	Caspase-3, eIF2AK3, GSK3 alpha/beta, GSK3 beta, DYRK1a, Ubiquitin, ERK1/2, PKC, IRE1, ERK2 (MAPK1)
168	Inhibition of neutrophil migration by proresolving lipid mediators in COPD	71	8.03832e-09	7.3893e-08	8.03832e-09	7.3893e-08	11	c-Abl, Alpha-actinin, NF-kB, ITGB2, TLR4, ICAM1, PKC, CD34, IL-1 beta, PECAM1, TNF-alpha
169	CAR-mediated direct regulation of xenobiotic metabolizing enzymes / Rodent version	40	8.78675e-09	1.85656e-07	0.456622	0.484745	1	CYP1A2
170	CAR-mediated direct regulation of xenobiotic metabolizing enzymes / Human version	40	8.78675e-09	1.85656e-07	0.456622	0.484745	1	CYP1A2
171	Development_VEGF signaling and activation	42	9.74801e-09	8.83013e-08	9.74801e-09	8.83013e-08	9	PI3K cat class IA, I-kB, NF-kB, VCAM1, ICAM1, ERK1/2, IKK-gamma, PKC, VEGF-A
172	Stromal-epithelial interaction in Prostate Cancer	42	9.74801e-09	8.83013e-08	9.74801e-09	8.83013e-08	9	ACTA2, FGFR1, MMP-9, TGF-beta 1, PDGF-R-alpha, IL-6, PDGF-R-beta, MMP-2, HGF receptor (Met)
173	G-protein signaling_Proinsulin C-peptide signaling	52	1.05034e-08	2.11683e-07	9.91461e-07	5.06339e-06	8	PI3K cat class IA, I-kB, NF-kB, NF-kB p50/p65, Bcl-2, ERK1/2, Proinsulin C-peptide, eNOS
174	NF-kB-, AP-1- and MAPKs-mediated proinflammatory cytokine production by eosinophils in asthma	43	1.21693e-08	1.09436e-07	1.21693e-08	1.09436e-07	9	NF-kB, NF-kB p50/p65, ERK1/2, IL-1 beta, ERK2 (MAPK1), IL-6, Leptin, CCL2, TNF-alpha
175	Development_The role of GDNF ligand family/ RET receptor in cell survival, growth and proliferation	92	1.24268e-08	1.10947e-07	1.24268e-08	1.10947e-07	12	PI3K cat class IA, NF-kB, Bcl-2, ERK1/2, IKK-gamma, VEGFR-1, VEGF-A, RET, p90RSK2(RPS6KA3), NFKBIA, GDNF, HIF1A
176	Stem cells_Role of growth factors in the maintenance of embryonic stem cell pluripotency	53	1.30038e-08	2.46884e-07	1.37119e-05	5.09475e-05	7	PI3K cat class IA, Caspase-3, FGFR1, ErbB2, GSK3 beta, TGF-beta 1, ERK1/2
177	Aberrant production of IL-2 and IL-17 in SLE T cells	58	1.34455e-08	1.1834e-07	1.34455e-08	1.1834e-07	10	I-kB, Syk, NF-kB p50/p65, TGF-beta 1, ERK1/2, RelA (p65 NF-kB subunit), IL-1 beta, IL-6, Lck, ZAP70
178	Signal transduction_Leptin signaling in non-neuronal cells	58	1.34455e-08	1.1834e-07	1.34455e-08	1.1834e-07	10	PI3K cat class IA, I-kB, Casein kinase II, alpha chains, NF-kB p50/p65, Bcl-2, AMPK alpha subunit, RelA (p65 NF-kB subunit), IL-6, Leptin, AMPK alpha 2 subunit
179	Role of IL-2 in the enhancement of NK cell cytotoxicity in multiple sclerosis	31	1.36226e-08	1.19054e-07	1.36226e-08	1.19054e-07	8	PI3K cat class IA, I-kB, NF-kB, NF-kB p50/p65, Ubiquitin, IKK-gamma, TNF-alpha, NF-kB1 (p50)
180	Chemoresistance pathways mediated by constitutive activation of PI3K pathway and BCL-2 in small cell lung cancer	42	1.46844e-08	2.74808e-07	3.65358e-05	0.000121232	6	PI3K cat class IA, Caspase-3, c-Kit, FGFR1, Bcl-2, Bax
181	TGF-beta 1-mediated induction of EMT in normal and asthmatic airway epithelium	44	1.51012e-08	1.30143e-07	1.51012e-08	1.30143e-07	9	ACTA2, MMP-9, PAI1, TGF-beta 1, CTGF, DDR1, IL-1 beta, MMP-2, TNF-alpha
182	Leptin signaling in colorectal cancer	44	1.51012e-08	1.30143e-07	1.51012e-08	1.30143e-07	9	PI3K cat class IA, GSK3 beta, ERK1/2, RelA (p65 NF-kB subunit), VEGF-A, IL-6, Leptin, c-Myc, NFKBIA
183	EML4/ALK fusion protein in nonsmoking-related lung cancer	32	1.59879e-08	2.91509e-07	3.91188e-07	2.20666e-06	7	PI3K cat class IA, I-kB, NF-kB, ErbB2, ERK1/2, c-Myc, PI3K cat class IA (p110-alpha)
184	ErbB2-induced breast cancer cell invasion	67	1.64404e-08	2.95027e-07	5.68262e-08	4.19769e-07	10	MEK3(MAP2K3), PI3K cat class IA, I-kB, NF-kB, ErbB2, MMP-9, ERK1/2, VEGF-A, SLK, MMP-2
185	Translation_Non-genomic (rapid) action of Androgen Receptor	43	1.87743e-08	3.27925e-07	0.00045012	0.00113768	5	NF-kB, ErbB2, GSK3 beta, ERK2 (MAPK1), PI3K cat class IA (p110-alpha)
186	HGF receptor (Met) and MSP receptor (RON) signaling pathways in SCLC	43	1.87743e-08	3.27925e-07	4.19326e-05	0.000136226	6	MEK3(MAP2K3), PI3K cat class IA, ERK1/2, VEGF-A, PKR, HGF receptor (Met)
187	Immune response_Platelet activating factor/ PTAFR pathway signaling	55	1.9649e-08	3.34288e-07	1.17423e-07	7.91964e-07	9	MEK3(MAP2K3), PI3K cat class IA, NF-kB, NF-kB p50/p65, MMP-9, IL-1 beta, CCL2, NFKBIA, NF-AT
188	Effect of H. pylori infection on inflammation in gastric epithelial cells	61	2.23451e-08	1.88641e-07	2.23451e-08	1.88641e-07	10	MEK3(MAP2K3), I-kB, CD74, iNOS, NF-kB p50/p65, TLR4, ERK1/2, IKK-gamma, IL-6, TNF-alpha
189	Role of fibroblasts in the sensitization phase of allergic contact dermatitis	22	2.25188e-08	1.88823e-07	2.25188e-08	1.88823e-07	7	NF-kB, IL-1 alpha, MMP-9, IL-1 beta, IL-6, MMP-2, TNF-alpha
190	FGF signaling in pancreatic cancer	46	2.28666e-08	1.90452e-07	2.28666e-08	1.90452e-07	9	PI3K cat class IA, NF-kB, FGFR1, MMP-9, TGF-beta 1, ERK1/2, VEGF-A, NFKBIA, PLAT (TPA)
191	Immune response_OX40L/ OX40 signaling pathway	69	2.32589e-08	3.85685e-07	8.72828e-07	4.57038e-06	9	PI3K cat class IA, I-kB, NF-kB, Aurora-B, NF-kB p50/p65, Bcl-2, GSK3 beta, IKK-gamma, PKC-theta
192	The innate immune response to contact allergens	33	2.33653e-08	1.92029e-07	2.33653e-08	1.92029e-07	8	NF-kB, IL-1 alpha, TLR4, IL-1 beta, IL-6, CCL2, HSP70, TNF-alpha
193	Normal and pathological TGF-beta-mediated regulation of cell proliferation	33	2.33653e-08	1.92029e-07	2.33653e-08	1.92029e-07	8	c-Abl, MEK3(MAP2K3), PDGF receptor, GSK3 beta, TGF-beta 1, PDGF-R-alpha, PDGF-R-beta, c-Myc
194	Regulation of mast cell survival in asthma	47	2.79175e-08	2.27932e-07	2.79175e-08	2.27932e-07	9	c-Kit, Syk, Bcl-2, GSK3 beta, ERK1/2, IL-6, TNF-alpha, Thy-1, Bax
195	Development_Role of CDK5 in neuronal development	34	2.87901e-08	4.65618e-07	0.0143942	0.0238176	3	PI3K cat class IA, GSK3 beta, Fyn
196	B cell signaling in hematological malignancies	80	2.9239e-08	2.3716e-07	2.9239e-08	2.3716e-07	11	I-kB, NF-kB, IRAK4, Syk, Bcl-2, Ubiquitin, IKK-gamma, IL-6, Lyn, ZAP70, PECAM1
197	Type 2 diabetes (general schema)	14	2.97212e-08	2.39506e-07	2.97212e-08	2.39506e-07	6	IL-1 beta, IL-6, Leptin, CCL2, Insulin processed, TNF-alpha
198	Disruption of epithelial layer restitution in asthma	34	3.01632e-08	2.415e-07	3.01632e-08	2.415e-07	8	IL-1 alpha, MMP-9, Endothelin-1, PAI1, TGF-beta 1, IL-1 beta, TNF-alpha, HGF receptor (Met)
199	DNA damage_Role of SUMO in p53 regulation	17	3.23991e-08	5.17595e-07	0.228158	0.278138	1	Ubiquitin
200	Development_Glucocorticoid receptor signaling	25	3.31086e-08	5.22558e-07	0.000497295	0.00124424	4	NF-kB, PAI1, HSP70, NFKBIA
201	Neuropeptide signaling in pancreatic cancer	48	3.39169e-08	2.66398e-07	3.39169e-08	2.66398e-07	9	NF-kB, ERK1/2, VEGF-A, CCL2, c-Myc, PRKD1, NF-kB p65/p65, NFKBIA, HGF receptor (Met)
202	IL-17-induced mucin expression in CF airways	48	3.39169e-08	2.66398e-07	3.39169e-08	2.66398e-07	9	I-kB, NF-kB, NF-kB p50/p65, TLR4, TGF-beta 1, ERK1/2, IKK-gamma, IL-1 beta, IL-6
203	GLP-1 in beta cell apoptosis in type 2 diabetes	48	3.39169e-08	2.66398e-07	3.39169e-08	2.66398e-07	9	Caspase-3, I-kB, NF-kB, Bcl-2, GSK3 beta, ERK1/2, IL-1 beta, TNF-alpha, Bax
204	Immune response_IL-15 signaling	58	3.53117e-08	5.44216e-07	1.8915e-07	1.18553e-06	9	PI3K cat class IA, I-kB, NF-kB p50/p65, Bcl-2, ERK1/2, UFO, IL-6, c-Myc, Lck
205	Immune response_IL-3 signaling via ERK and PI3K	102	3.63326e-08	5.53439e-07	2.30128e-05	7.97734e-05	9	PI3K cat class IA, Syk, GSK3 alpha/beta, Bcl-2, GSK3 beta, ERK1/2, p90Rsk, Lyn, PI3K cat class IA (p110-alpha)
206	Role of growth factor receptors transactivation by Hyaluronic acid / CD44 signaling in tumor progression	35	3.80315e-08	5.66151e-07	7.52214e-07	4.00642e-06	7	PI3K cat class IA, ErbB2, MMP-9, TGF-beta 1, ERK1/2, MMP-2, HGF receptor (Met)
207	Anti-apoptotic action of Gastrin in pancreatic cancer	35	3.80315e-08	5.66151e-07	7.52214e-07	4.00642e-06	7	MEK3(MAP2K3), PI3K cat class IA, Caspase-3, Bcl-2, RelA (p65 NF-kB subunit), NFKBIA, Bax
208	NF-kB pathway in multiple myeloma	35	3.85995e-08	2.97528e-07	3.85995e-08	2.97528e-07	8	I-kB, NF-kB, NF-kB p50/p65, Bcl-2, IKK-gamma, IL-6, c-Myc, NF-kB1 (p50)
209	NALP3 inflammasome activation in age-related macular degeneration (AMD)	35	3.85995e-08	2.97528e-07	3.85995e-08	2.97528e-07	8	Caspase-3, NF-kB, IL-1 alpha, Ubiquitin, RelA (p65 NF-kB subunit), IL-1 beta, IL-6, TNF-alpha
210	Development_PIP3 signaling in cardiac myocytes	47	4.69957e-08	6.76531e-07	7.02522e-05	0.000216335	6	PI3K cat class IA, GSK3 alpha/beta, c-Myc, Insulin processed, p90Rsk, HGF receptor (Met)
211	Metabolic syndrome X (general schema)	15	4.89159e-08	3.71323e-07	4.89159e-08	3.71323e-07	6	PAI1, IL-1 beta, IL-6, Leptin, Insulin processed, TNF-alpha
212	VEGF signaling in multiple myeloma	50	4.93702e-08	3.71323e-07	4.93702e-08	3.71323e-07	9	PI3K cat class IA, ERK1 (MAPK3), VCAM1, ICAM1, VEGFR-1, VEGF-A, ERK2 (MAPK1), IL-6, c-Myc
213	Rheumatoid arthritis (general schema)	50	4.93702e-08	3.71323e-07	4.93702e-08	3.71323e-07	9	MMP-9, VCAM1, TLR4, ICAM1, IL-1 beta, VEGF-A, IL-6, TGF-beta, TNF-alpha
214	Proteases and EGFR-activated mucin production in airway epithelium in COPD	50	4.93702e-08	3.71323e-07	4.93702e-08	3.71323e-07	9	PI3K cat class IA, NF-kB, Bcl-2, ErbB2, MMP-9, ERK1/2, NFKBIA, TNF-alpha, HIF1A
215	PR action in breast cancer: stimulation of cell growth and proliferation	36	4.97611e-08	7.08555e-07	0.000191995	0.000525972	5	ErbB2, MMP-9, ERK1/2, c-Myc, MMP-2
216	B-regulatory cells and tumor cells intercellular interaction	67	5.68262e-08	4.19769e-07	5.68262e-08	4.19769e-07	10	NF-kB, TLR4, TGF-beta 1, RelA (p65 NF-kB subunit), IL-1 beta, VEGF-A, IL-6, CCL2, NF-kB p65/p65, TNF-alpha
217	Development_Growth factors in regulation of oligodendrocyte progenitor cell proliferation	67	5.68262e-08	4.19769e-07	5.68262e-08	4.19769e-07	10	PI3K cat class IA, FGFR1, ErbB2, GSK3 beta, ERK1/2, PKC, PDGF-R-alpha, Fyn, Lyn, HGF receptor (Met)
218	Resolution of inflammation in healing myocardial infarction	25	6.10871e-08	4.45936e-07	6.10871e-08	4.45936e-07	7	NF-kB, MMP-9, TGF-beta 1, ERK1/2, VEGF-A, MMP-2, HGF receptor (Met)
219	EGFR family signaling in pancreatic cancer	75	6.14543e-08	8.47423e-07	1.71133e-07	1.11192e-06	10	PI3K cat class IA, I-kB, NF-kB, Bcl-2, ErbB2, MMP-9, ERK1/2, VEGF-A, c-Myc, MMP-2
220	Apoptosis and survival_Anti-apoptotic action of nuclear ESR1 and ESR2	37	6.17067e-08	4.47825e-07	6.17067e-08	4.47825e-07	8	MEK3(MAP2K3), NF-kB p50/p65, Bcl-2, ERK1/2, c-Myc, nNOS, NF-kB1 (p50), Bax
221	Th2 cytokine- and TNF-alpha-induced profibrotic response in asthmatic airway fibroblasts/ myofibroblasts	52	7.06396e-08	5.09673e-07	7.06396e-08	5.09673e-07	9	NF-kB, ACTA2, MMP-9, TGF-beta 1, ERK1/2, PDGF-R-alpha, IL-1 beta, MMP-2, TNF-alpha
222	Signal transduction_Adenosine A1 receptor signaling pathway	62	7.3038e-08	9.47325e-07	0.000333557	0.000869631	6	I-kB, NF-kB, SFK, ERK1/2, PKC, MMP-2
223	Development_Alpha-2 adrenergic receptor activation of ERK	62	7.3038e-08	9.47325e-07	0.0142357	0.0236817	4	PI3K cat class IA, ERK1 (MAPK3), ERK1/2, ERK2 (MAPK1)
224	Mucin expression in CF airways	69	7.59105e-08	5.44537e-07	7.59105e-08	5.44537e-07	10	MEK3(MAP2K3), PI3K cat class IA, I-kB, NF-kB p50/p65, ErbB2, ERK1/2, IL-1 beta, p90Rsk, NFKBIA, PKC-theta
225	Sorafenib-induced inhibition of cell proliferation and angiogenesis in HCC	16	7.72868e-08	5.51224e-07	7.72868e-08	5.51224e-07	6	ERK1 (MAPK3), ERK1/2, VEGFR-1, VEGF-A, ERK2 (MAPK1), PDGF-R-beta
226	Neuroprotective action of lithium	63	8.68178e-08	1.07826e-06	4.4293e-06	1.9086e-05	8	MEK3(MAP2K3), Caspase-3, Bcl-2, GSK3 beta, VEGF-A, HSP70, nNOS, Bax
227	Hypertrophy of asthmatic airway smooth muscle cells	70	8.74152e-08	6.19899e-07	8.74152e-08	6.19899e-07	10	ACTA2, GSK3 beta, Endothelin-1, Actin muscle, TGF-beta 1, PDGF-R-alpha, IL-1 beta, PDGF-R-beta, c-Myc, TNF-alpha
228	Suppression of p53 signaling in multiple myeloma	50	8.80712e-08	1.07826e-06	0.000100143	0.000295897	6	Caspase-3, Bcl-2, VEGF-A, IL-6, c-Myc, Bax
229	Pro-inflammatory action of Gastrin in gastric cancer	50	8.80712e-08	1.07826e-06	0.000909864	0.00212644	5	PI3K cat class IA, I-kB, NF-kB p50/p65, ERK1/2, RelA (p65 NF-kB subunit)
230	Role of tumor microenvironment in plexiform neurofibroma formation in neurofibromatosis type 1	39	9.58303e-08	6.60696e-07	9.58303e-08	6.60696e-07	8	PI3K cat class IA, c-Kit, VCAM1, TGF-beta 1, ERK1/2, VEGF-A, PDGF-R-beta, MMP-2
231	Immune response_TSLP signalling	39	9.58303e-08	6.60696e-07	9.58303e-08	6.60696e-07	8	PI3K cat class IA, NF-kB, Bcl-2, ERK1/2, IL-6, CCL2, c-Myc, NFKBIA
232	Apoptosis and survival_Ubiquitination and phosphorylation in TNF-alpha-induced NF-kB signaling	39	9.58303e-08	6.60696e-07	9.58303e-08	6.60696e-07	8	NF-kB p50/p65, Ubiquitin, IKK-gamma, RelA (p65 NF-kB subunit), NF-kB1 (p105), NFKBIA, TNF-alpha, NF-kB1 (p50)
233	Autocrine Somatotropin signaling in breast cancer	39	9.58303e-08	6.60696e-07	9.58303e-08	6.60696e-07	8	MEK3(MAP2K3), Catalase, Bcl-2, GPX1, ERK1/2, VEGFR-1, VEGF-A, c-Myc
234	Cooperative action of IFN-gamma and TNF-alpha on astrocytes in multiple sclerosis	39	9.58303e-08	6.60696e-07	9.58303e-08	6.60696e-07	8	I-kB, NF-kB, iNOS, ICAM1, PKR, CCL2, NFKBIA, TNF-alpha
235	NRF2 regulation of oxidative stress response	54	9.94905e-08	6.82142e-07	9.94905e-08	6.82142e-07	9	PI3K cat class IA, eIF2AK3, Casein kinase II, alpha chains, ERK1 (MAPK3), GSK3 beta, Ubiquitin, PKC, ERK2 (MAPK1), Fyn
236	HGF signaling in melanoma	39	1.0585e-07	1.27214e-06	0.000282682	0.000743237	5	PI3K cat class IA, GSK3 beta, ERK1/2, HGF receptor (Met), HIF1A
237	Role of IFN-beta in the improvement of blood-brain barrier integrity in multiple sclerosis	27	1.10006e-07	7.45999e-07	1.10006e-07	7.45999e-07	7	NF-kB, MMP-9, VCAM1, ICAM1, sVCAM1, TNF-alpha, sICAM1
238	Regulation of VEGF signaling in pancreatic cancer	27	1.10006e-07	7.45999e-07	1.10006e-07	7.45999e-07	7	NF-kB p50/p65, IL-1 alpha, ERK1/2, VEGFR-1, VEGF-A, IL-6, HIF1A
239	Apoptosis and survival_NGF activation of NF-kB	40	1.18254e-07	7.93261e-07	1.18254e-07	7.93261e-07	8	PI3K cat class IA, I-kB, NF-kB, iNOS, Bcl-2, IKK-gamma, NFKBIA, PKC-lambda/iota
240	Tumor-stroma interactions in pancreatic cancer	28	1.44815e-07	9.50878e-07	1.44815e-07	9.50878e-07	7	FGFR1, TGF-beta 1, VEGF-A, PDGF-R-beta, MMP-2, HGF receptor (Met), HIF1A
241	Glucocorticoid- and LABA-mediated inhibition of pro-inflammatory signaling in airway fibroblasts/myofibroblasts	28	1.44815e-07	9.50878e-07	1.44815e-07	9.50878e-07	7	NF-kB, IL-1 alpha, VCAM1, ICAM1, IL-1 beta, IL-6, TNF-alpha
242	Aryl hydrocarbon receptor signaling	53	1.57931e-07	1.83088e-06	0.0458263	0.0672228	3	c-Myc, CYP1A2, HIF1A
243	Immune response_Inhibitory PD-1 signaling in T cells	53	1.57931e-07	1.83088e-06	1.15279e-06	5.76859e-06	8	PI3K cat class IA, Syk, GSK3 beta, ICAM1, ERK1/2, Lck, ZAP70, PKC-theta
244	Cell cycle_Influence of Ras and Rho proteins on G1/S Transition	53	1.57931e-07	1.83088e-06	1.37119e-05	5.09475e-05	7	PI3K cat class IA, NF-kB p50/p65, GSK3 beta, ERK1/2, RelA (p65 NF-kB subunit), c-Myc, NFKBIA
245	Role of CNTF and LIF in regulation of oligodendrocyte development in multiple sclerosis	30	1.63171e-07	1.87503e-06	0.00101577	0.00234743	4	PI3K cat class IA, Caspase-3, RelA (p65 NF-kB subunit), NFKBIA
246	Role of microRNAs in cell migration, survival and angiogenesis in colorectal cancer	67	1.67879e-07	1.89588e-06	7.08562e-06	2.87303e-05	8	Bcl-2, MMP-9, CTGF, UFO, VEGF-A, MMP-2, HGF receptor (Met), HIF1A
247	FGF2 in multiple myeloma	18	1.74714e-07	1.12565e-06	1.74714e-07	1.12565e-06	6	PI3K cat class IA, ERK1 (MAPK3), FGFR1, ERK2 (MAPK1), IL-6, FGFR4
248	FAK1 signaling in melanoma	42	1.76874e-07	1.12565e-06	1.76874e-07	1.12565e-06	8	NF-kB, NF-kB p50/p65, ERK1/2, RelA (p65 NF-kB subunit), VEGF-A, MMP-2, NFKBIA, NF-kB1 (p50)
249	Signal transduction_Angiotensin II/ AGTR1 signaling via TGF-beta 1 and SMADs	42	1.76874e-07	1.12565e-06	1.76874e-07	1.12565e-06	8	NF-kB, GSK3 beta, PAI1, TGF-beta 1, CTGF, ERK1/2, IL-1 beta, FASN
250	Apoptosis and survival_Lymphotoxin-beta receptor signaling	42	1.76874e-07	1.12565e-06	1.76874e-07	1.12565e-06	8	Caspase-3, I-kB, NF-kB p50/p65, VCAM1, IKK-gamma, RelA (p65 NF-kB subunit), NF-kB1 (p50), Bax
251	Prostate Cancer: candidate susceptibility genes in inflammatory pathways	29	1.88473e-07	1.18553e-06	1.88473e-07	1.18553e-06	7	NF-kB, IL-1 alpha, TLR4, IL-1 beta, VEGF-A, IL-6, TNF-alpha
252	Role of integrins in eosinophil degranulation in asthma	58	1.8915e-07	1.18553e-06	1.8915e-07	1.18553e-06	9	PI3K cat class IA, VCAM1, ICAM1, ERK1/2, PKC, ERK2 (MAPK1), FGR, CCL13, TNF-alpha
253	Signal transduction_mTORC2 downstream signaling	68	1.96497e-07	2.2001e-06	7.92785e-06	3.16349e-05	8	GSK3 alpha/beta, GSK3 beta, TLR4, PKC, SGK1, HXK4, c-Myc, FASN
254	Macrophage-induced immunosuppression in the tumor microenvironment	96	1.99634e-07	1.24495e-06	1.99634e-07	1.24495e-06	11	NF-kB p50/p50, CAT-2, M-CSF receptor, Calcipressin 1, TGF-beta 1, ERK1/2, IL-6, CCL2, Angiopoietin 2, NF-kB1 (p50), HIF1A
255	Inhibition of apoptosis in gastric cancer	42	2.10473e-07	2.29767e-06	3.65358e-05	0.000121232	6	Caspase-3, NF-kB, Bcl-2, TGF-beta 1, HGF receptor (Met), Bax
256	Role of Insulin in regulation of eating behavior in obesity	43	2.14521e-07	1.31792e-06	2.14521e-07	1.31792e-06	8	NF-kB p50/p65, GPX1, TLR4, RelA (p65 NF-kB subunit), Insulin processed, NFKBIA, NF-kB1 (p50), PKC-theta
257	Immune response_Substance P-stimulated expression of proinflammatory cytokines via MAPKs	43	2.14521e-07	1.31792e-06	2.14521e-07	1.31792e-06	8	I-kB, NF-kB p50/p65, ERK1/2, IL-6, CCL2, CCL13, TNF-alpha, PKC-theta
258	Apoptosis and survival_TNFR1 signaling pathway	43	2.14521e-07	1.31792e-06	2.14521e-07	1.31792e-06	8	Caspase-3, I-kB, NF-kB, Bcl-2, IKK-gamma, GCK(MAP4K2), TNF-alpha, Bax
259	Immune response_IL-23 signaling pathway	31	2.15852e-07	2.32645e-06	9.19837e-05	0.000273745	5	PI3K cat class IA, NF-kB, NF-kB p50/p65, Ubiquitin, NFKBIA
260	Chemotaxis_CXCR3-A signaling	69	2.29353e-07	2.4427e-06	0.00383396	0.00763715	5	MMP-9, ERK1/2, Lck, MMP-2, ZAP70
261	Stem cells_Neovascularization of glioblastoma in response to hypoxia	30	2.42718e-07	1.47654e-06	2.42718e-07	1.47654e-06	7	I-kB, NF-kB p50/p65, Ubiquitin, IKK-gamma, VEGFR-1, VEGF-A, HIF1A
262	Signal transduction_Additional pathways of NF-kB activation (in the nucleus)	30	2.42718e-07	1.47654e-06	2.42718e-07	1.47654e-06	7	I-kB, NF-kB p50/p65, ERK1/2, IKK-gamma, RelA (p65 NF-kB subunit), NFKBIA, NF-kB1 (p50)
263	Signal transduction_Angiotensin II/ AGTR1 signaling via RhoA and JNK	78	2.49819e-07	1.51232e-06	2.49819e-07	1.51232e-06	10	MMP-9, Endothelin-1, PAI1, TLR4, CTGF, ERK1/2, VEGF-A, CCL2, eNOS, MMP-2
264	Immune response_LTBR1 signaling	60	2.5586e-07	1.54137e-06	2.5586e-07	1.54137e-06	9	PI3K cat class IA, I-kB, iNOS, Syk, NF-kB p50/p65, ERK1/2, PKC, eNOS, nNOS
265	T regulatory cell migration in asthma	22	2.59025e-07	2.73647e-06	0.0430232	0.0634861	2	Lck, PI3K cat class IA (p110-alpha)
266	Development_c-Kit ligand signaling pathway during hemopoiesis	61	2.96276e-07	1.77623e-06	2.96276e-07	1.77623e-06	9	PI3K cat class IA, c-Kit, MMP-9, ERK1/2, VEGFR-1, VEGF-A, p90Rsk, Fyn, Lyn
267	Autocrine production of eosinophil pro-survival cytokines in asthma	31	3.09538e-07	1.81919e-06	3.09538e-07	1.81919e-06	7	PI3K cat class IA, NF-kB, NF-kB p50/p65, VCAM1, ICAM1, ERK1/2, TNF-alpha
268	Role of TNF-alpha, IL-1beta and IL-6 in development of obesity and type 2 diabetes in liver	45	3.10772e-07	1.81919e-06	3.10772e-07	1.81919e-06	8	CRP, PAI1, RelA (p65 NF-kB subunit), IL-1 beta, HXK4, IL-6, Insulin processed, TNF-alpha
269	Main pathways of Schwann cells transformation in neurofibromatosis type 1	80	3.18476e-07	1.85553e-06	3.18476e-07	1.85553e-06	10	PI3K cat class IA, PDGF receptor, Bcl-2, ErbB2, GSK3 beta, ERK1/2, VEGF-A, IL-6, PDGF-R-beta, HIF1A
270	Cytoskeleton remodeling_ESR1 action on cytoskeleton remodeling and cell migration	23	3.65531e-07	3.80037e-06	0.295642	0.346451	1	PI3K cat class IA
271	Role of GIP in pathogenesis of type 2 diabetes	46	3.71384e-07	2.14366e-06	3.71384e-07	2.14366e-06	8	MEK3(MAP2K3), Caspase-3, Bcl-2, Ubiquitin, ERK1/2, AMPK alpha subunit, Insulin processed, Bax
272	EGFR signaling in Prostate Cancer	46	3.71384e-07	2.14366e-06	3.71384e-07	2.14366e-06	8	PI3K cat class IA, ERK1 (MAPK3), ErbB2, ERK1/2, RelA (p65 NF-kB subunit), ERK2 (MAPK1), c-Myc, NFKBIA
273	Upregulation of IL-8 expression in colorectal cancer	32	3.91188e-07	2.20666e-06	3.91188e-07	2.20666e-06	7	NF-kB p50/p65, TGF-beta 1, RelA (p65 NF-kB subunit), IL-1 beta, NFKBIA, TNF-alpha, NF-kB1 (p50)
274	Interleukins-induced inflammatory signaling in normal and asthmatic airway epithelium	32	3.91188e-07	2.20666e-06	3.91188e-07	2.20666e-06	7	NF-kB, IRAK4, NF-kB p50/p65, IL-1 alpha, ERK1/2, IL-1 beta, IL-6
275	Hedgehog signaling in pancreatic cancer	32	3.91188e-07	2.20666e-06	3.91188e-07	2.20666e-06	7	Bcl-2, MMP-9, TGF-beta 1, ERK1/2, RelA (p65 NF-kB subunit), IL-1 beta, TNF-alpha
276	Activation of ACTH production in pituitary gland in major depressive disorder	32	3.91188e-07	2.20666e-06	3.91188e-07	2.20666e-06	7	I-kB, IRAK4, NF-kB p50/p65, IKK-gamma, IL-1 beta, IL-6, TNF-alpha
277	Mechanisms of resistance to EGFR inhibitors in lung cancer	45	3.95303e-07	4.04568e-06	0.000557561	0.00137561	5	PI3K cat class IA, ERK1 (MAPK3), ErbB2, ERK2 (MAPK1), HGF receptor (Met)
278	Role of proinflammatory cytokines in activation of p53 in major depressive disorder	47	4.41839e-07	2.4811e-06	4.41839e-07	2.4811e-06	8	Caspase-3, NF-kB, Bcl-2, TrkB, TGF-beta, NFKBIA, TNF-alpha, Bax
279	Immune response_Inhibitory action of Lipoxins on pro-inflammatory TNF-alpha signaling	46	4.82286e-07	4.78633e-06	5.20466e-06	2.16744e-05	7	PI3K cat class IA, I-kB, NF-kB p50/p65, IKK-gamma, IL-1 beta, IL-6, TNF-alpha
280	Apoptosis and survival_IL-17-induced CIKS-independent signaling pathways	46	4.82286e-07	4.78633e-06	5.20466e-06	2.16744e-05	7	PI3K cat class IA, NF-kB, NF-kB p50/p65, GSK3 beta, ERK1/2, p90Rsk, PI3K cat class IA (p110-alpha)
281	K-RAS signaling in lung cancer	46	4.82286e-07	4.78633e-06	0.00501499	0.009649	4	MMP-9, ERK1/2, CCL2, PI3K cat class IA (p110-alpha)
282	Immune response_CD40 signaling	65	5.18533e-07	2.88565e-06	5.18533e-07	2.88565e-06	9	MEK3(MAP2K3), PI3K cat class IA, I-kB, NF-kB, NF-kB p50/p65, ICAM1, IL-6, CCL2, Lyn
283	Aberrant lipid trafficking and metabolism in age-related macular degeneration pathogenesis	60	5.34751e-07	5.22779e-06	0.0127355	0.0215323	4	Caspase-3, CRP, PI3K cat class IA (p110-alpha), TNF-alpha
284	Mechanisms of drug resistance in multiple myeloma	49	6.17552e-07	3.39107e-06	6.17552e-07	3.39107e-06	8	GSK3 alpha/beta, NF-kB p50/p65, Bcl-2, ERK1/2, IL-6, c-Myc, NFKBIA, Bax
285	Immune response_Bacterial infections in normal airways	49	6.17552e-07	3.39107e-06	6.17552e-07	3.39107e-06	8	I-kB, NF-kB, IRAK4, iNOS, TLR4, IKK-gamma, IL-1 beta, IL-6
286	G protein-coupled receptors signaling in lung cancer	76	6.30331e-07	6.07157e-06	0.000996696	0.00231196	6	I-kB, Endothelin-1, ERK1/2, RelA (p65 NF-kB subunit), VEGF-A, MMP-2
287	Origin of Langerhans cells in the steady-state and under inflammatory conditions	22	6.67781e-07	3.65073e-06	6.67781e-07	3.65073e-06	6	M-CSF receptor, TGF-beta 1, IL-1 beta, CCL2, TNF-alpha, P-selectin
288	Eosinophil survival in asthma	67	6.75822e-07	3.67849e-06	6.75822e-07	3.67849e-06	9	iNOS, Syk, Bcl-2, TrkB, ICAM1, ERK1/2, Lyn, TNF-alpha, Bax
289	IGF-1 receptor/EGFR cooperation in lung cancer	25	6.90734e-07	6.50979e-06	0.00610824	0.0112802	3	PI3K cat class IA, p90Rsk, Bax
290	Activation of pro-oncogenic TGF-beta potential in gastric cancer	25	6.90734e-07	6.50979e-06	0.00610824	0.0112802	3	MMP-9, TGF-beta 1, MMP-2
291	Putative pathways of hormone action in neurofibromatosis type 1	25	6.90734e-07	6.50979e-06	0.316806	0.366067	1	PI3K cat class IA
292	Apoptosis and survival_HTR1A signaling	50	7.25778e-07	3.93314e-06	7.25778e-07	3.93314e-06	8	Caspase-3, I-kB, NF-kB, ERK1 (MAPK3), NF-kB p50/p65, Bcl-2, ERK2 (MAPK1), Bax
293	Production and activation of TGF-beta in airway smooth muscle cells	35	7.52214e-07	4.00642e-06	7.52214e-07	4.00642e-06	7	PAI1, TLR4, TGF-beta 1, ERK1/2, RelA (p65 NF-kB subunit), TGF-beta, NFKBIA
294	TNF-alpha and IL-1 beta induce hyperglycemia in obesity and type 2 diabetes in adipocytes	35	7.52214e-07	4.00642e-06	7.52214e-07	4.00642e-06	7	NF-kB, RelA (p65 NF-kB subunit), IL-1 beta, ERK2 (MAPK1), Insulin processed, NFKBIA, TNF-alpha
295	Inhibition of apoptosis in multiple myeloma	36	7.5414e-07	7.00655e-06	1.46243e-05	5.36946e-05	6	Caspase-3, NF-kB, NF-kB p50/p65, Bcl-2, TLR4, IL-6
296	Immune response_Histamine signaling in dendritic cells	51	8.49796e-07	4.48765e-06	8.49796e-07	4.48765e-06	8	ERK1 (MAPK3), NF-kB p50/p65, RelA (p65 NF-kB subunit), IL-1 beta, ERK2 (MAPK1), IL-6, CCL2, TNF-alpha
297	Anti-apoptotic action of ErbB2 in breast cancer	51	8.49796e-07	4.48765e-06	8.49796e-07	4.48765e-06	8	Caspase-3, I-kB, NF-kB p50/p65, Bcl-2, ErbB2, ERK1/2, c-Myc, PI3K cat class IA (p110-alpha)
298	Immune response_CD16 signaling in NK cells	69	8.72828e-07	4.57038e-06	8.72828e-07	4.57038e-06	9	PI3K cat class IA, Syk, ERK1/2, ERK2 (MAPK1), Lck, ZAP70, TNF-alpha, PKC-theta, PIP5K1A
299	Development_EPO-induced Jak-STAT pathway	36	9.21957e-07	4.76728e-06	9.21957e-07	4.76728e-06	7	ERK1 (MAPK3), Bcl-2, Pim-1, ERK1/2, ERK2 (MAPK1), c-Myc, Lyn
300	Endothelial cell apoptosis in COPD	36	9.21957e-07	4.76728e-06	9.21957e-07	4.76728e-06	7	PI3K cat class IA, Caspase-3, NF-kB, Bcl-2, GPX1, VEGF-A, eNOS
301	Upregulation of MITF in melanoma	36	9.21957e-07	4.76728e-06	9.21957e-07	4.76728e-06	7	c-Kit, Bcl-2, ERK1/2, VEGF-A, ERK2 (MAPK1), HGF receptor (Met), HIF1A
302	Cell cycle_Transition and termination of DNA replication	26	9.27922e-07	8.44152e-06	0.327149	0.376267	1	Ubiquitin
303	Development_Delta-type opioid receptor mediated cardioprotection	37	9.44378e-07	8.53197e-06	0.00225489	0.00475142	4	PI3K cat class IA, ERK1 (MAPK3), GSK3 beta, ERK2 (MAPK1)
304	Influence of bone marrow cell environment on progression of multiple myeloma	52	9.91461e-07	5.06339e-06	9.91461e-07	5.06339e-06	8	PI3K cat class IA, VCAM1, VEGFR-1, IL-1 beta, VEGF-A, IL-6, TNF-alpha, HGF receptor (Met)
305	Signal transduction_Adenosine A2A receptor signaling pathway	52	9.91461e-07	5.06339e-06	9.91461e-07	5.06339e-06	8	I-kB, GSK3 beta, SFK, TrkB, ERK1/2, RelA (p65 NF-kB subunit), eNOS, NF-kB1 (p50)
306	Development_IGF-1 receptor signaling	50	1.0172e-06	9.00355e-06	9.23074e-06	3.63662e-05	7	PI3K cat class IA, I-kB, NF-kB, GSK3 alpha/beta, ERK1/2, c-Myc, p90Rsk
307	Down-regulation of mast cell functions through ITIM-containing inhibitory receptors in asthma	37	1.12268e-06	5.64068e-06	1.12268e-06	5.64068e-06	7	c-Kit, Syk, ERK1/2, CCL2, Fyn, Lyn, PECAM1
308	Deregulation of PSD-95-dependent signaling in Huntington's disease	37	1.12268e-06	5.64068e-06	1.12268e-06	5.64068e-06	7	ERK1 (MAPK3), ERK1/2, RelA (p65 NF-kB subunit), ERK2 (MAPK1), p90Rsk, nNOS, Bax
309	IL-6 signaling in colorectal cancer	37	1.12268e-06	5.64068e-06	1.12268e-06	5.64068e-06	7	CRP, ICAM1, TGF-beta 1, IL-6, c-Myc, HSP70, Bax
310	Role of alveolar cell senescence in COPD	37	1.12268e-06	5.64068e-06	1.12268e-06	5.64068e-06	7	I-kB, NF-kB p50/p65, CTGF, ERK1/2, RelA (p65 NF-kB subunit), IL-6, eNOS
311	NF-AT signaling in cardiac hypertrophy	65	1.15494e-06	1.00865e-05	5.62601e-06	2.32729e-05	8	PI3K cat class IA, Troponin I, cardiac, NF-AT3(NFATC4), GSK3 beta, Endothelin-1, IL-6, Troponin T, cardiac, PRKD1
312	Insulin-like growth factor family signaling in melanoma	38	1.17409e-06	1.01858e-05	0.000249465	0.000664348	5	PI3K cat class IA, GSK3 beta, ERK1/2, PKC, VEGF-A
313	Dual role of TGF-beta 1 in HCC	24	1.17474e-06	5.85481e-06	1.17474e-06	5.85481e-06	6	NF-kB, Bcl-2, PAI1, TGF-beta 1, VEGF-A, NFKBIA
314	Immune response_M-CSF-receptor signaling pathway	81	1.21325e-06	1.02539e-05	2.91934e-05	9.84484e-05	8	PI3K cat class IA, NF-kB, Syk, M-CSF receptor, ERK1/2, PKC, c-Myc, Fyn
315	Inhibition of TGF-beta 1 signaling in early colorectal cancer	27	1.22978e-06	1.0327e-05	4.58965e-05	0.000146798	5	PI3K cat class IA, MMP-9, TGF-beta 1, c-Myc, MMP-2
316	Th17 cells in CF	54	1.33597e-06	6.63176e-06	1.33597e-06	6.63176e-06	8	NF-kB, VCAM1, TLR4, ICAM1, TGF-beta 1, ERK1/2, IL-1 beta, IL-6
317	Stem cells_Role of TGF-beta 1 in fibrosis development after myocardial infarction	38	1.35877e-06	6.66494e-06	1.35877e-06	6.66494e-06	7	ACTA2, MMP-9, Endothelin-1, PAI1, TGF-beta 1, CTGF, MMP-2
318	Role of Endothelin-1 in inflammation and vasoconstriction in Sickle cell disease	38	1.35877e-06	6.66494e-06	1.35877e-06	6.66494e-06	7	PI3K cat class IA, Endothelin-1, ERK1/2, RelA (p65 NF-kB subunit), VEGFR-1, CCL2, HIF1A
319	Substance P-mediated inflammation and pain in Sickle cell disease	38	1.35877e-06	6.66494e-06	1.35877e-06	6.66494e-06	7	NF-kB, NF-kB p50/p65, VCAM1, ICAM1, IL-1 beta, IL-6, TNF-alpha
320	Transcription_P53 signaling pathway	39	1.44976e-06	1.19446e-05	2.3593e-05	8.04364e-05	6	NF-kB, Bcl-2, ATR, VEGFR-1, VEGF-A, MMP-2
321	Cell cycle progression in Prostate Cancer	39	1.44976e-06	1.19446e-05	0.0208131	0.0332421	3	GSK3 beta, ERK1/2, IL-6
322	Development_Cross-talk between VEGF and Angiopoietin 1 signaling pathways	25	1.52641e-06	7.39953e-06	1.52641e-06	7.39953e-06	6	I-kB, NF-kB, VCAM1, ICAM1, IKK-gamma, VEGF-A
323	A proinflammatory phenotype of senescent alveolar epithelial cells in COPD	25	1.52641e-06	7.39953e-06	1.52641e-06	7.39953e-06	6	I-kB, Casein kinase II, alpha chains, NF-kB p50/p65, RelA (p65 NF-kB subunit), IL-6, TNF-alpha
324	Zinc deficiency in Prostate Cancer	25	1.52641e-06	7.39953e-06	1.52641e-06	7.39953e-06	6	NF-kB, MMP-9, ICAM1, VEGF-A, IL-6, NFKBIA
325	Immune response_Immunological synapse formation	55	1.54338e-06	7.45268e-06	1.54338e-06	7.45268e-06	8	c-Abl, PI3K cat class IA, ITGB2, VCAM1, ICAM1, Fyn, ZAP70, PKC-theta
326	Signal transduction_mTORC1 upstream signaling	74	1.59543e-06	7.67415e-06	1.59543e-06	7.67415e-06	9	PDGF receptor, GSK3 beta, TLR4, ERK1/2, AMPK alpha subunit, ERK2 (MAPK1), Insulin processed, p90Rsk, TNF-alpha
327	Development_Role of CNTF and LIF in regulation of oligodendrocyte development	28	1.60973e-06	1.30978e-05	0.000776972	0.00185427	4	PI3K cat class IA, Caspase-3, RelA (p65 NF-kB subunit), NFKBIA
328	Regulation of Beta-catenin activity in melanoma	28	1.60973e-06	1.30978e-05	3.12709e-06	1.40606e-05	6	Bcl-2, ErbB2, GSK3 beta, MMP-9, VEGF-A, MMP-2
329	Role of neurotrophins in activation of p53 in major depressive disorder	39	1.63503e-06	7.74457e-06	1.63503e-06	7.74457e-06	7	PI3K cat class IA, Bcl-2, PAI1, TrkB, TrkC, PLAT (TPA), Bax
330	Development_ERBB-family signaling	39	1.63503e-06	7.74457e-06	1.63503e-06	7.74457e-06	7	PI3K cat class IA, I-kB, NF-kB, ErbB2, ERK1/2, IKK-gamma, c-Myc
331	Signal transduction_Leptin signaling via JAK/STAT and MAPK cascade	39	1.63503e-06	7.74457e-06	1.63503e-06	7.74457e-06	7	Caspase-3, MMP-9, Endothelin-1, ERK1/2, VEGF-A, Leptin, p90Rsk
332	Apoptosis and survival_APRIL and BAFF signaling	39	1.63503e-06	7.74457e-06	1.63503e-06	7.74457e-06	7	I-kB, NF-kB p50/p50, NF-kB p50/p65, Bcl-2, IKK-gamma, RelA (p65 NF-kB subunit), NF-kB1 (p50)
333	Non-genomic signaling of ESR2 (membrane) in lung cancer cells	53	1.70044e-06	1.36661e-05	0.00118824	0.00271066	5	PI3K cat class IA, ERK1 (MAPK3), ERK1/2, VEGF-A, ERK2 (MAPK1)
334	Apoptotic pathways and resistance to apoptosis in lung cancer cells	53	1.70044e-06	1.36661e-05	1.37119e-05	5.09475e-05	7	Caspase-3, NF-kB, FGFR1, Bcl-2, ERK1/2, TNF-alpha, Bax
335	Development_YAP/TAZ-mediated co-regulation of transcription	56	1.7776e-06	8.38783e-06	1.7776e-06	8.38783e-06	8	ITGB2, Catalase, Endothelin-1, CTGF, UFO, VEGF-A, c-Myc, HIF1A
336	Reproduction_Progesterone-mediated oocyte maturation	40	1.77869e-06	1.39526e-05	0.00301252	0.00621019	4	GSK3 beta, ERK2 (MAPK1), p90Rsk, Aurora-A
337	The role of UV radiation in melanoma development	40	1.77869e-06	9.16362e-06	1.95678e-06	9.16362e-06	7	NF-kB, NF-kB p50/p65, ERK1/2, ERK2 (MAPK1), GCK(MAP4K2), NFKBIA, TNF-alpha
338	IL-6 signaling in Prostate Cancer	40	1.77869e-06	1.39526e-05	2.74111e-05	9.26899e-05	6	PI3K cat class IA, NF-kB p50/p65, ErbB2, Pim-1, ERK2 (MAPK1), IL-6
339	Inhibition of Vitamin D pathway in Prostate Cancer	40	1.77869e-06	1.39526e-05	0.122092	0.157994	2	Bcl-2, IL-6
340	Memory CD8+ T cells in allergic contact dermatitis	40	1.95678e-06	9.16362e-06	1.95678e-06	9.16362e-06	7	NF-kB, NF-kB p50/p65, VCAM1, ICAM1, IL-1 beta, TNF-alpha, P-selectin
341	Lysophospholipid mediators-induced inflammatory signaling in normal and asthmatic airway epithelium	57	2.04139e-06	9.52391e-06	2.04139e-06	9.52391e-06	8	I-kB, NF-kB, NF-kB p50/p65, MMP-9, ERK1/2, IKK-gamma, Lyn, NFKBIA
342	Abnormalities in cell cycle in SCLC	29	2.08312e-06	1.60523e-05	0.0706387	0.0987192	2	Aurora-B, c-Myc
343	Blood coagulation_GPIb-IX-V-dependent platelet activation	77	2.23995e-06	1.03723e-05	2.23995e-06	1.03723e-05	9	MEK3(MAP2K3), Alpha-actinin, Syk, ERK2 (MAPK1), eNOS, Fyn, Lyn, PI3K cat class IA (p110-alpha), Actin
344	Cell adhesion_Integrin inside-out signaling in neutrophils	77	2.23995e-06	1.03723e-05	2.23995e-06	1.03723e-05	9	iNOS, ITGB2, Syk, PIP5KI, ICAM1, ERK2 (MAPK1), FGR, Lyn, P-selectin
345	Apoptosis and survival_Phosphorylation and acetylation in TNF-alpha-induced NF-kB signaling	41	2.32978e-06	1.07482e-05	2.32978e-06	1.07482e-05	7	PI3K cat class IA, NF-kB p50/p65, ERK1/2, RelA (p65 NF-kB subunit), NFKBIA, PKC-lambda/iota, TNF-alpha
346	Cell adhesion_ECM remodeling	55	2.34965e-06	1.77922e-05	0.00943898	0.0165918	4	MMP-9, PAI1, MMP-2, PLAT (TPA)
347	PGE2 pathways in cancer	55	2.34965e-06	1.77922e-05	1.75985e-05	6.31206e-05	7	ERK1 (MAPK3), GSK3 beta, VEGF-A, ERK2 (MAPK1), c-Myc, TNF-alpha, HIF1A
348	Activation of osteoclast differentiation in bone lesions formation in multiple myeloma	27	2.48803e-06	1.13935e-05	2.48803e-06	1.13935e-05	6	VCAM1, ERK1/2, IKK-gamma, RelA (p65 NF-kB subunit), NFKBIA, PKC-lambda/iota
349	HCV-dependent regulation of membrane receptors signaling in HCC	27	2.48803e-06	1.13935e-05	2.48803e-06	1.13935e-05	6	I-kB, NF-kB p50/p65, ERK1/2, IL-1 beta, ERK2 (MAPK1), TNF-alpha
350	Apoptosis and survival_BAD phosphorylation	42	2.62988e-06	1.91998e-05	0.000402657	0.00103672	5	PI3K cat class IA, Bcl-2, ERK1/2, p90Rsk, Bax
351	Development_Growth hormone signaling via PI3K/AKT and MAPK cascades	42	2.62988e-06	1.91998e-05	0.0036043	0.00724949	4	MEK3(MAP2K3), GSK3 beta, ERK2 (MAPK1), PI3K cat class IA (p110-alpha)
352	Estradiol metabolism	42	2.62988e-06	1.91998e-05	0.472972	0.49869	1	CYP1A2
353	Immune response_Mast cell proliferation, differentiation and survival	30	2.66745e-06	1.91998e-05	4.80642e-06	2.04273e-05	6	c-Kit, Syk, ERK1/2, Fyn, Lyn, PI3K cat class IA (p110-alpha)
354	Regulation of IGF family activity in colorectal cancer	30	2.66745e-06	1.91998e-05	0.0102045	0.0176869	3	MMP-9, IL-1 beta, IL-6
355	Activation of TGF-beta signaling in advanced colorectal cancer	30	2.66745e-06	1.91998e-05	7.80969e-05	0.000238128	5	PI3K cat class IA, MMP-9, PAI1, TGF-beta 1, c-Myc
356	Mitogenic action of ErbB2 in breast cancer	56	2.74742e-06	1.96673e-05	1.98586e-05	7.0413e-05	7	PI3K cat class IA, I-kB, NF-kB, ErbB2, GSK3 beta, ERK1/2, c-Myc
357	Role of TNF-alpha in type 2 diabetes in skeletal muscle cells	42	2.76036e-06	1.25941e-05	2.76036e-06	1.25941e-05	7	AMPK alpha subunit, RelA (p65 NF-kB subunit), ERK2 (MAPK1), Insulin processed, NFKBIA, TNF-alpha, PKC-theta
358	PR action in breast cancer: stimulation of metastasis	20	2.85778e-06	2.02361e-05	0.262667	0.314037	1	PI3K cat class IA (p110-alpha)
359	Immune response_IL-6 signaling pathway via JAK/STAT	72	3.03004e-06	2.13406e-05	0.00460345	0.00898251	5	iNOS, ICAM1, VEGF-A, IL-6, CCL2
360	IL-17 and IL-17F-induced inflammatory signaling in normal and asthmatic airway epithelium	28	3.12709e-06	1.40606e-05	3.12709e-06	1.40606e-05	6	I-kB, NF-kB p50/p65, ICAM1, ERK1/2, IL-6, p90Rsk
361	Chemotaxis_CCL16-, CCL20-, CXCL16- and CCL25-mediated cell migration	43	3.17128e-06	2.19809e-05	0.137364	0.175741	2	MMP-9, MMP-2
362	ESR1 (membrane) 36 kDa isoform signaling in breast cancer	43	3.17128e-06	2.19809e-05	0.026906	0.0415304	3	PI3K cat class IA, ERK1/2, c-Myc
363	Nicotine / nAChR alpha-7 signaling in NSCLC	43	3.17128e-06	2.19809e-05	4.19326e-05	0.000136226	6	PI3K cat class IA, ERK1/2, VEGF-A, p90Rsk, PKC-lambda/iota, HIF1A
364	Gamma-Secretase regulation of neuronal cell development and function	57	3.20177e-06	2.20753e-05	0.212815	0.261747	2	ACTA2, GSK3 beta
365	Immune response_BAFF-induced canonical NF-kB signaling	43	3.25539e-06	1.448e-05	3.25539e-06	1.448e-05	7	IRAK4, NF-kB p50/p65, Ubiquitin, IKK-gamma, NF-kB1 (p105), NFKBIA, NF-kB1 (p50)
366	Regulation of Tissue factor signaling in cancer	43	3.25539e-06	1.448e-05	3.25539e-06	1.448e-05	7	ERK1 (MAPK3), ERK1/2, VEGF-A, ERK2 (MAPK1), PI3K cat class IA (p110-alpha), TNF-alpha, P-selectin
367	Immune response_Fc epsilon RI pathway: signaling through Fyn and PI3K	61	3.45562e-06	1.53158e-05	3.45562e-06	1.53158e-05	8	I-kB, NF-kB, Syk, SGK1, FGR, Fyn, Lyn, NF-AT
368	Development_Prolactin receptor signaling	58	3.71924e-06	2.50441e-05	0.000230841	0.000622768	6	PI3K cat class IA, NF-kB p50/p65, Bcl-2, ERK1/2, c-Myc, Fyn
369	IGF signaling in lung cancer	44	3.8044e-06	1.68208e-05	3.8223e-06	1.68208e-05	7	PI3K cat class IA, MMP-9, ATR, ERK1/2, VEGF-A, p90Rsk, MMP-2
370	Development_Ligand-independent activation of ESR1 and ESR2	44	3.8044e-06	2.50441e-05	4.79501e-05	0.000152135	6	PI3K cat class IA, ERK1 (MAPK3), ErbB2, ERK1/2, ERK2 (MAPK1), PI3K cat class IA (p110-alpha)
371	Immune response_CRTH2 signaling in Th2 cells	44	3.8044e-06	2.50441e-05	0.000501681	0.00125017	5	ITGB2, GSK3 beta, ICAM1, PKC, Bax
372	Transition of HCC cells to invasive and migratory phenotype	44	3.8044e-06	2.50441e-05	0.00427041	0.0083458	4	PI3K cat class IA, GSK3 beta, MMP-9, MMP-2
373	Development_S1P1 signaling pathway	44	3.8044e-06	2.50441e-05	0.0285623	0.043923	3	GSK3 beta, eNOS, PI3K cat class IA (p110-alpha)
374	Apoptosis and survival_Inhibition of ROS-induced apoptosis by 17beta-estradiol	44	3.8223e-06	1.68208e-05	3.8223e-06	1.68208e-05	7	MEK3(MAP2K3), I-kB, NF-kB p50/p65, Bcl-2, GPX1, NF-kB1 (p50), Bax
375	Suppression of TGF-beta signaling in pancreatic cancer	29	3.89368e-06	1.70744e-05	3.89368e-06	1.70744e-05	6	MEK3(MAP2K3), MMP-9, TGF-beta 1, VEGF-A, ERK2 (MAPK1), c-Myc
376	Immune response_Distinct metabolic pathways in naive and effector CD8+ T cells	74	3.90882e-06	2.56028e-05	0.000122634	0.00035725	7	PI3K cat class IA, Pim-2, ERK1/2, c-Myc, Lck, Fyn, HIF1A
377	Transition of Smoldering multiple myeloma to active multiple myeloma (schema)	17	3.97692e-06	1.7378e-05	3.97692e-06	1.7378e-05	5	NF-kB, IL-1 beta, IL-6, CCL2, c-Myc
378	Chemotaxis_Lysophosphatidic acid signaling via GPCRs	129	4.11663e-06	2.67701e-05	0.000145301	0.00041075	9	Caspase-3, Bcl-2, GSK3 beta, PAK, CTGF, ERK1/2, PKC, PRKD1, Bax
379	Androgen receptor activation and downstream signaling in Prostate cancer	110	4.2396e-06	2.67701e-05	4.20719e-05	0.000136322	9	ERK1 (MAPK3), FGFR1, ErbB2, TGF-beta 1, SGK1, VEGF-A, ERK2 (MAPK1), IL-6, c-Myc
380	Putative pathways for stimulation of fat cell differentiation by Bisphenol A	32	4.25051e-06	2.67701e-05	0.0121957	0.0206478	3	PI3K cat class IA, Leptin, FASN
381	Stem cells_Cooperation between Hedgehog, IGF-2 and HGF signaling pathways in medulloblastoma stem cells	32	4.25051e-06	2.67701e-05	7.15363e-06	2.87303e-05	6	PI3K cat class IA, Bcl-2, GSK3 beta, c-Myc, HGF receptor (Met), Bax
382	Selective Insulin resistance in type 2 diabetes in liver	32	4.25051e-06	2.67701e-05	0.000107693	0.000315205	5	GSK3 alpha/beta, HXK4, Insulin processed, PI3K cat class IA (p110-alpha), PKC-theta
383	Cell cycle_Role of APC in cell cycle regulation	32	4.25051e-06	2.67701e-05	0.0838314	0.115083	2	Aurora-B, Aurora-A
384	Epithelial cell apoptosis in COPD	32	4.25051e-06	2.67701e-05	0.000107693	0.000315205	5	I-kB, NF-kB, eIF2AK3, Bcl-2, Bax
385	HCV-mediated liver damage and predisposition to HCC via cell stress	63	4.4293e-06	1.9086e-05	4.4293e-06	1.9086e-05	8	Caspase-3, NF-kB, IL-1 alpha, IRE1, IL-6, c-Myc, TNF-alpha, Bax
386	Transcription_Sirtuin6 regulation and functions	63	4.4293e-06	1.9086e-05	4.4293e-06	1.9086e-05	8	Ubiquitin, ICAM1, LDHA, AMPK alpha subunit, RelA (p65 NF-kB subunit), HXK4, HIF1A, FASN
387	Transport_Macropinocytosis regulation by growth factors	63	4.4293e-06	1.9086e-05	4.4293e-06	1.9086e-05	8	PDGF receptor, M-CSF receptor, AMPK alpha subunit, PDGF-R-alpha, PDGF-R-beta, Leptin, PI3K cat class IA (p110-alpha), HGF receptor (Met)
388	Retinal ganglion cell damage in glaucoma	45	4.46916e-06	1.91249e-05	4.46916e-06	1.91249e-05	7	NF-kB, iNOS, Endothelin-1, TrkB, TrkC, TNF-alpha, Bax
389	Signal transduction_Angiotensin II/ AGTR1 signaling via JAK/STAT	45	4.46916e-06	1.91249e-05	4.46916e-06	1.91249e-05	7	I-kB, ERK1/2, AMPK alpha subunit, PKC, IL-6, Fyn, NFKBIA
390	Development_Membrane-bound ESR1: interaction with growth factors signaling	45	4.5415e-06	2.83303e-05	0.000557561	0.00137561	5	PI3K cat class IA, GSK3 alpha/beta, ErbB2, ERK1/2, eNOS
391	SLE genetic marker-specific pathways in antigen-presenting cells (APC)	84	4.6686e-06	1.99097e-05	4.6686e-06	1.99097e-05	9	I-kB, NF-kB, IL-1 alpha, Ubiquitin, TLR4, ICAM1, IRE1, IL-1 beta, TNF-alpha
392	Neutrophil resistance to apoptosis in COPD and proresolving impact of lipid mediators	60	4.97265e-06	3.07272e-05	0.000278497	0.000738492	6	MEK3(MAP2K3), PI3K cat class IA, Caspase-3, ERK1/2, TNF-alpha, Bax
393	Development_TGF-beta-dependent induction of EMT via RhoA, PI3K and ILK	46	5.20466e-06	2.16744e-05	5.20466e-06	2.16744e-05	7	PI3K cat class IA, I-kB, ACTA2, GSK3 beta, TGF-beta 1, RelA (p65 NF-kB subunit), Actin
394	Transcription_Hypoxia- and receptor-mediated HIF-1 activation	46	5.20466e-06	2.16744e-05	5.20466e-06	2.16744e-05	7	PI3K cat class IA, ErbB2, GSK3 beta, ERK1/2, IL-1 beta, Insulin processed, HIF1A
395	Nociception_Expression and role of Nociceptin in immune system	46	5.20466e-06	2.16744e-05	5.20466e-06	2.16744e-05	7	TLR4, ERK1/2, RelA (p65 NF-kB subunit), IL-1 beta, IL-6, CCL2, TNF-alpha
396	Stem cells_Role of GSK3 beta in cardioprotection against myocardial infarction	33	5.29635e-06	3.21312e-05	0.0132688	0.0222221	3	PI3K cat class IA, Caspase-3, GSK3 beta
397	IL-2 as a growth factor for T cells in multiple sclerosis	33	5.29635e-06	3.21312e-05	0.000125382	0.000361019	5	PI3K cat class IA, NF-kB, Bcl-2, GSK3 beta, c-Myc
398	Stem cells_EGF-induced proliferation of Type C cells in SVZ of adult brain	33	5.29635e-06	3.21312e-05	0.0132688	0.0222221	3	PI3K cat class IA, ERK1/2, Fyn
399	Inhibition of RUNX3 signaling in gastric cancer	22	5.30514e-06	3.21312e-05	0.000297921	0.000780001	4	Caspase-3, Bcl-2, MMP-9, VEGF-A
400	Immune response_IFN-alpha/beta signaling via PI3K and NF-kB pathways	94	5.39555e-06	3.21312e-05	0.000541656	0.00134708	7	PI3K cat class IA, I-kB, NF-kB, GSK3 beta, ERK1/2, RelA (p65 NF-kB subunit), c-Myc
401	Transcription_Androgen Receptor nuclear signaling	46	5.39608e-06	3.21312e-05	0.000617988	0.00150377	5	GSK3 beta, TGF-beta 1, ERK2 (MAPK1), IL-6, MMP-2
402	Arachidonic acid metabolites production in alveolar macrophages in asthma	31	5.88567e-06	2.4106e-05	5.88567e-06	2.4106e-05	6	NF-kB, Endothelin-1, TLR4, IL-1 beta, CCL2, TNF-alpha
403	IL-1 beta-dependent CFTR expression	31	5.88567e-06	2.4106e-05	5.88567e-06	2.4106e-05	6	I-kB, IRAK4, NF-kB p50/p65, Ubiquitin, IKK-gamma, IL-1 beta
404	Mechanisms of K-RAS addiction in lung cancer cells	31	5.88567e-06	2.4106e-05	5.88567e-06	2.4106e-05	6	Syk, Bcl-2, ERK1/2, NF-kB1 (p105), NFKBIA, PI3K cat class IA (p110-alpha)
405	Development_TGF-beta-dependent induction of EMT via MAPK	47	6.03815e-06	2.46492e-05	6.03815e-06	2.46492e-05	7	MEK3(MAP2K3), Endothelin-1, PAI1, TGF-beta 1, ERK1/2, TGF-beta, MMP-2
406	Th2 cell migration in asthma	34	6.5477e-06	3.84641e-05	0.00164004	0.00360218	4	VCAM1, ICAM1, Lck, PI3K cat class IA (p110-alpha)
407	Role of IFN-beta in inhibition of Th1 cell differentiation in multiple sclerosis	34	6.5477e-06	3.84641e-05	0.00164004	0.00360218	4	PI3K cat class IA, NF-kB, GSK3 beta, TLR4
408	Stem cells_MMP-14-induced COX-2 expression in glioblastoma stem cells	23	7.04853e-06	4.12213e-05	2.00909e-05	7.04679e-05	5	NF-kB, NF-kB p50/p65, VEGF-A, MMP-2, NF-kB1 (p50)
409	Ligand-independent activation of Androgen receptor in Prostate Cancer	67	7.08562e-06	2.87303e-05	7.08562e-06	2.87303e-05	8	c-Abl, PI3K cat class IA, ERK1 (MAPK3), FGFR1, ErbB2, GSK3 beta, ERK2 (MAPK1), c-Myc
410	Role of IL-6 in obesity and type 2 diabetes in adipocytes	32	7.15363e-06	2.87303e-05	7.15363e-06	2.87303e-05	6	CRP, PAI1, ERK1/2, IL-6, CCL2, Insulin processed
411	Apoptosis and survival_IL-17-induced CIKS-dependent MAPK signaling pathways	32	7.15363e-06	2.87303e-05	7.15363e-06	2.87303e-05	6	MEK3(MAP2K3), NF-kB p50/p65, Ubiquitin, ERK1/2, IKK-gamma, NF-kB1 (p105)
412	Main genetic and epigenetic alterations in lung cancer	48	7.51806e-06	4.36168e-05	7.92911e-05	0.000240588	6	Bcl-2, TGF-beta 1, VEGF-A, c-Myc, MMP-2, HGF receptor (Met)
413	Eosinophil adhesion and transendothelial migration in asthma	68	7.92785e-06	3.16349e-05	7.92785e-06	3.16349e-05	8	c-Kit, MMP-9, VCAM1, ICAM1, ERK1/2, PKC, CCL13, P-selectin
414	Neutrophil-derived granule proteins and cytokines in asthma	49	8.04005e-06	3.18776e-05	8.04005e-06	3.18776e-05	7	Syk, MMP-9, TGF-beta 1, ERK1/2, PKC, FGR, TNF-alpha
415	Immune response_PD-1-induced metabolic changes in T cells	49	8.04005e-06	3.18776e-05	8.04005e-06	3.18776e-05	7	PI3K cat class IA, Casein kinase II, alpha chains, ERK1/2, Lck, Fyn, ZAP70, FASN
416	Development_Dopamine D2 receptor transactivation of EGFR	24	9.22917e-06	5.2113e-05	0.00543492	0.0102816	3	PI3K cat class IA, ERK1 (MAPK3), ERK2 (MAPK1)
417	Development_Adenosine A2B receptor signaling	50	9.23074e-06	3.63662e-05	9.23074e-06	3.63662e-05	7	MEK3(MAP2K3), PI3K cat class IA, NF-kB, GSK3 beta, ERK1/2, IL-6, eNOS
418	Prolactin/ ERK signaling in breast cancer	36	9.79273e-06	5.39012e-05	0.000191995	0.000525972	5	PI3K cat class IA, GSK3 beta, ERK1/2, c-Myc, MMP-2
419	Cigarette smoke components TCDD and Benzo[a]pyrene and receptor AHR signaling in lung epithelial cells	36	9.79273e-06	5.39012e-05	0.00203483	0.00433887	4	TGF-beta 1, IL-1 beta, CCL2, TNF-alpha
420	Immune response_Regulation of T cell function by CTLA-4	36	9.79273e-06	5.36946e-05	1.46243e-05	5.36946e-05	6	PI3K cat class IA, NF-kB, Lck, Fyn, Lyn, ZAP70
421	Development_SSTR2 in regulation of cell proliferation	36	9.79273e-06	5.39012e-05	0.0168027	0.0274371	3	PI3K cat class IA, ERK1/2, nNOS
422	Epigenetic alterations in ovarian cancer	82	1.00054e-05	5.48413e-05	0.000234121	0.000628884	7	Aurora-B, FGFR1, ErbB2, MMP-9, MMP-2, Aurora-A, Bax
423	Development_Thromboxane A2 signaling pathway	50	1.03052e-05	5.6016e-05	0.000909864	0.00212644	5	PI3K cat class IA, GSK3 alpha/beta, ERK1/2, PKC, IL-6
424	Development_S1P1 receptor signaling via beta-arrestin	34	1.0354e-05	4.04067e-05	1.0354e-05	4.04067e-05	6	ERK1 (MAPK3), ERK1/2, ERK2 (MAPK1), PDGF-R-beta, p90Rsk, PI3K cat class IA (p110-alpha)
425	Role of Apo-2L(TNFSF10) in Prostate Cancer cell apoptosis	34	1.0354e-05	4.04067e-05	1.0354e-05	4.04067e-05	6	Caspase-3, I-kB, NF-kB, Bcl-2, IKK-gamma, Bax
426	Inflammatory factors-induced expression of mucins in normal and asthmatic epithelium	51	1.05641e-05	4.08412e-05	1.05641e-05	4.08412e-05	7	I-kB, NF-kB p50/p65, ERK1/2, IL-1 beta, IL-6, p90RSK2(RPS6KA3), TNF-alpha
427	Immune response_BAFF-induced signaling	51	1.05641e-05	4.08412e-05	1.05641e-05	4.08412e-05	7	MEK3(MAP2K3), GSK3 alpha/beta, ERK1 (MAPK3), Ubiquitin, Pim-2, ERK1/2, ERK2 (MAPK1)
428	Epithelial cell anoikis in COPD	51	1.05641e-05	4.08412e-05	1.05641e-05	4.08412e-05	7	MEK3(MAP2K3), PI3K cat class IA, Alpha-actinin, Bcl-2, MMP-9, ERK1/2, Bax
429	Tumor metabolic pathways promoting development of Treg cells	94	1.18519e-05	4.55363e-05	1.18519e-05	4.55363e-05	9	FGFR1, ErbB2, LDHA, TGF-beta 1, AMPK alpha subunit, RelA (p65 NF-kB subunit), c-Myc, HIF1A, FASN
430	Immune response_IL-4 signaling pathway	94	1.18519e-05	4.55363e-05	1.18519e-05	4.55363e-05	9	Syk, GSK3 alpha/beta, NF-kB p50/p65, Bcl-2, ERK1/2, IKK-gamma, PKC, ERK2 (MAPK1), NFKBIA
431	Development_TGF-beta receptor signaling	52	1.20531e-05	4.61665e-05	1.20531e-05	4.61665e-05	7	MEK3(MAP2K3), NF-kB, ErbB2, PAI1, TGF-beta 1, ERK1/2, NFKBIA
432	Immune response_Inflammasome in inflammatory response	35	1.23406e-05	4.68339e-05	1.23406e-05	4.68339e-05	6	I-kB, NF-kB, TLR4, IKK-gamma, IL-1 beta, TNF-alpha
433	Cell adhesion_Plasmin signaling	35	1.23406e-05	4.68339e-05	1.23406e-05	4.68339e-05	6	MEK3(MAP2K3), PI3K cat class IA, FGFR1, TGF-beta 1, VEGF-A, PLAT (TPA)
434	Role of Tissue factor in cancer independent of coagulation protease signaling	35	1.23406e-05	4.68339e-05	1.23406e-05	4.68339e-05	6	ERK1 (MAPK3), ERK1/2, VEGF-A, ERK2 (MAPK1), Lyn, PI3K cat class IA (p110-alpha)
435	Mast cell migration in asthma	73	1.35198e-05	5.09475e-05	1.35198e-05	5.09475e-05	8	c-Kit, PDGF receptor, FGFR1, TGF-beta 1, ERK1/2, VEGFR-1, VEGF-A, CCL2
436	Effect of H. pylori infection on apoptosis in gastric epithelial cells	53	1.37119e-05	5.09475e-05	1.37119e-05	5.09475e-05	7	c-Abl, Caspase-3, I-kB, NF-kB, Bcl-2, TNF-alpha, Bax
437	Immune response_Gastrin in inflammatory response	68	1.42633e-05	7.62652e-05	0.00359934	0.00724949	5	PI3K cat class IA, I-kB, ERK1 (MAPK3), NF-kB p50/p65, ERK2 (MAPK1)
438	Th17 cytokines in COPD	36	1.46243e-05	5.36946e-05	1.46243e-05	5.36946e-05	6	NF-kB, MMP-9, TGF-beta 1, IL-1 beta, IL-6, CCL2
439	Role of ER stress in obesity and type 2 diabetes	54	1.55551e-05	5.69437e-05	1.55551e-05	5.69437e-05	7	PI3K cat class IA, eIF2AK3, IRE1, HXK4, PKR, Insulin processed, FASN
440	Inhibition of GSK3 beta by lithium in major depressive disorder	22	1.59172e-05	5.80979e-05	1.59172e-05	5.80979e-05	5	Bcl-2, GSK3 beta, PAI1, TrkB, TGF-beta 1
441	Development_Role of HDAC and calcium/calmodulin-dependent kinase (CaMK) in control of skeletal myogenesis	53	1.60885e-05	8.53276e-05	0.554531	0.569209	1	PI3K cat class IA
442	Immune response_HMGB1 release from the cell	39	1.70741e-05	8.04364e-05	2.3593e-05	8.04364e-05	6	PI3K cat class IA, NF-kB, HSPA1A, TLR4, IL-1 beta, TNF-alpha
443	FGFR3 signaling in multiple myeloma	37	1.72375e-05	6.27325e-05	1.72375e-05	6.27325e-05	6	ERK1 (MAPK3), ERK1/2, VEGF-A, ERK2 (MAPK1), p90RSK2(RPS6KA3), PI3K cat class IA (p110-alpha)
444	Basophil migration in asthma	55	1.75985e-05	6.31206e-05	1.75985e-05	6.31206e-05	7	MMP-9, VCAM1, ICAM1, VEGF-A, CCL2, CCL13, P-selectin
445	Immune response_IL-16 signaling pathway	55	1.75985e-05	6.31206e-05	1.75985e-05	6.31206e-05	7	Caspase-3, PKC, IL-1 beta, IL-6, Lck, PI3K cat class IA (p110-alpha), TNF-alpha
446	Immune response_Role of DAP12 receptors in NK cells	55	1.75985e-05	6.31206e-05	1.75985e-05	6.31206e-05	7	PI3K cat class IA, Syk, ERK1/2, Lck, Fyn, ZAP70, PKC-theta
447	Stem cells_Fetal brown fat cell differentiation	55	1.75985e-05	6.31206e-05	1.75985e-05	6.31206e-05	7	PI3K cat class IA, GSK3 beta, ERK1/2, Leptin, c-Myc, Insulin processed, FASN
448	SLE genetic marker-specific pathways in B cells	99	1.80802e-05	6.46614e-05	1.80802e-05	6.46614e-05	9	NF-kB, Syk, Bcl-2, TLR4, ERK1/2, IRE1, c-Myc, Lyn, TNF-alpha
449	Retinol metabolism	70	1.81294e-05	9.38713e-05	0.65657	0.666233	1	CYP1A2
450	HCV-dependent cytoplasmic signaling leading to HCC	27	1.92234e-05	9.87554e-05	4.58965e-05	0.000146798	5	ERK1/2, PKC, ERK2 (MAPK1), PKR, PI3K cat class IA (p110-alpha)
451	Apoptosis and survival_Endoplasmic reticulum stress response pathway	56	1.98586e-05	7.0413e-05	1.98586e-05	7.0413e-05	7	MEK3(MAP2K3), I-kB, eIF2AK3, NF-kB p50/p65, Bcl-2, IRE1, Bax
452	Immune response_IL-5 signaling via JAK/STAT	56	1.98586e-05	7.0413e-05	1.98586e-05	7.0413e-05	7	Bcl-2, Pim-1, IL-1 beta, VEGF-A, NF-kB1 (p105), c-Myc, NFKBIA
453	FGF signaling in gastric cancer	23	2.00909e-05	7.04679e-05	2.00909e-05	7.04679e-05	5	ERK1 (MAPK3), FGFR1, MMP-9, ERK2 (MAPK1), FGFR4
454	Immune response_IFN-alpha/beta signaling via MAPKs	77	2.01044e-05	7.04679e-05	2.01044e-05	7.04679e-05	8	MEK3(MAP2K3), CD45, Ubiquitin, ERK1/2, PKR, Lck, ZAP70, PKC-theta
455	Immune response_Role of integrins in NK cells cytotoxicity	38	2.02148e-05	7.04679e-05	2.02148e-05	7.04679e-05	6	MEK3(MAP2K3), ERK1 (MAPK3), VCAM1, ICAM1, ERK2 (MAPK1), Lyn
456	Neutrophil chemotaxis in asthma	38	2.02148e-05	7.04679e-05	2.02148e-05	7.04679e-05	6	NF-kB, MIF, ERK1/2, VEGFR-1, CCL2, HSP70
457	Eosinophil-derived cytokines in airway remodeling in asthma	38	2.02148e-05	7.04679e-05	2.02148e-05	7.04679e-05	6	NF-kB, MMP-9, TGF-beta 1, ERK1/2, VEGF-A, TNF-alpha
458	SLE genetic marker-specific pathways in T cells	101	2.12552e-05	7.38872e-05	2.12552e-05	7.38872e-05	9	I-kB, NF-kB, Bcl-2, NF-AT3(NFATC4), Ubiquitin, ERK1/2, Lck, ZAP70, PKC-theta
459	TrkB signaling in Huntington's disease	39	2.3593e-05	8.04364e-05	2.3593e-05	8.04364e-05	6	PI3K cat class IA, GluR1, TrkB, ERK1/2, PKC, p90Rsk
460	FGF2 signaling in melanoma	39	2.3593e-05	8.04364e-05	2.3593e-05	8.04364e-05	6	PI3K cat class IA, FGFR1, ERK1/2, VEGF-A, FGFR4, MMP-2
461	Breast cancer (general schema)	41	2.40552e-05	0.000121669	0.00329938	0.00669041	4	ErbB2, IL-6, Leptin, TGF-beta
462	Immune response _IFN gamma signaling pathway	56	2.43848e-05	0.000122862	0.000189852	0.000525906	6	PI3K cat class IA, VCAM1, ICAM1, ERK1/2, PKR, c-Myc
463	Apoptosis and survival_Ceramides signaling pathway	40	2.74111e-05	9.26899e-05	2.74111e-05	9.26899e-05	6	PI3K cat class IA, Caspase-3, Bcl-2, ERK1/2, TNF-alpha, Bax
464	IFN-gamma and Th2 cytokines-induced inflammatory signaling in normal and asthmatic airway epithelium	40	2.74111e-05	9.26899e-05	2.74111e-05	9.26899e-05	6	NF-kB, NF-kB p50/p65, ICAM1, ERK1/2, IL-6, CCL2
465	Cytoskeleton remodeling_FAK signaling	57	2.78432e-05	0.000138537	0.0106814	0.0184619	4	PI3K cat class IA, GSK3 beta, ERK1/2, VEGF-A
466	Signal transduction_Angiotensin II signaling via Beta-arrestin	57	2.78432e-05	0.000138537	0.0106814	0.0184619	4	GSK3 beta, ERK1/2, p90Rsk, Casein kinase II, alpha' chain (CSNK2A2)
467	Signal transduction_HTR2A signaling outside the nervous system	74	2.8583e-05	0.000139716	0.0255685	0.0399629	4	PI3K cat class IA, TGF-beta 1, ERK1/2, PKC
468	Immune response_IL-6 signaling pathway via MEK/ERK and PI3K/AKT cascades	74	2.8583e-05	0.000139716	0.00517378	0.00992375	5	PI3K cat class IA, GSK3 beta, ERK1/2, IL-6, Bax
469	Histone deacetylases in Prostate Cancer	29	2.97516e-05	0.00014435	0.00928566	0.0163919	3	HDAC8, Bax, HIF1A
470	Apoptosis and survival_p53-dependent apoptosis	29	2.97516e-05	0.00014435	0.000890747	0.00209756	4	c-Abl, Caspase-3, Bcl-2, Bax
471	Oxidative stress_ROS-mediated MAPK activation via canonical pathways	60	3.1432e-05	0.00010571	3.1432e-05	0.00010571	7	MEK3(MAP2K3), FGFR1, SFK, ERK1/2, ERK2 (MAPK1), PDGF-R-beta, Fyn
472	Development_S1P3 receptor signaling pathway	43	3.32342e-05	0.000157742	0.026906	0.0415304	3	PI3K cat class IA, PDGF receptor, eNOS
473	Apoptosis and survival_TNF-alpha-induced Caspase-8 signaling	43	3.32342e-05	0.000157742	0.0039278	0.00777417	4	Caspase-3, ErbB2, TNF-alpha, Bax
474	Regulation of immune cell differentiation by Notch signaling	43	3.32342e-05	0.000157742	0.137364	0.175741	2	PI3K cat class IA, Lck
475	Inhibition of GTPase prenylation by statins in asthma and COPD	42	3.65358e-05	0.000121232	3.65358e-05	0.000121232	6	I-kB, NF-kB p50/p65, ERK1/2, RelA (p65 NF-kB subunit), IL-6, TNF-alpha
476	Apoptosis and survival_Anti-apoptotic TNFs/NF-kB/Bcl-2 pathway	42	3.65358e-05	0.000121232	3.65358e-05	0.000121232	6	I-kB, NF-kB, Bcl-2, IKK-gamma, RelA (p65 NF-kB subunit), TNF-alpha
477	Signal transduction_WNT/Beta-catenin signaling in tissue homeostasis	42	3.65358e-05	0.000121232	3.65358e-05	0.000121232	6	iNOS, MMP-9, PAI1, Connexin 43, c-Myc, MMP-2
478	Immune response_Role of HMGB1 in dendritic cell maturation and migration	26	3.78579e-05	0.000125284	3.78579e-05	0.000125284	5	NF-kB, ERK1/2, IL-1 beta, IL-6, TNF-alpha
479	Impaired Lipoxin A4 signaling in CF	44	3.8802e-05	0.000182189	0.488833	0.513667	1	PDGF-R-beta
480	Development_Flt3 signaling	44	3.8802e-05	0.000152135	4.79501e-05	0.000152135	6	MEK3(MAP2K3), PI3K cat class IA, ERK1/2, FLT3, p90Rsk, Fyn
481	Development_Gastrin in cell growth and proliferation	62	3.9022e-05	0.000128452	3.9022e-05	0.000128452	7	PI3K cat class IA, ERK1 (MAPK3), ERK1/2, ERK2 (MAPK1), c-Myc, PRKD1, p90Rsk
482	Apoptosis and survival_NGF/ TrkA PI3K-mediated signaling	77	3.9438e-05	0.000184513	0.00612058	0.0112862	5	PI3K cat class IA, Bcl-2, GSK3 beta, ERK1/2, PAK2
483	Immune response_ICOS signaling pathway in T-helper cell	60	4.0774e-05	0.000188742	0.229524	0.279254	2	PI3K cat class IA, TNF-alpha
484	Cytoskeleton remodeling_Hyaluronic acid/ CD44 signaling pathways	43	4.19326e-05	0.000136226	4.19326e-05	0.000136226	6	ERK1/2, PRK2, Lck, Fyn, Actin, HGF receptor (Met)
485	Effect of H. pylori infection on gastric epithelial cells motility	43	4.19326e-05	0.000136226	4.19326e-05	0.000136226	6	c-Abl, Alpha-actinin, Connexin 43, ERK1/2, Lyn, Actin
486	Impaired inhibitory action of lipoxins and Resolvin E1 on neutrophil functions in CF	43	4.19326e-05	0.000136226	4.19326e-05	0.000136226	6	I-kB, NF-kB, ERK1/2, IL-1 beta, NFKBIA, TNF-alpha
487	Fibroblast differentiation to myofibroblasts in asthmatic airways	31	4.44763e-05	0.000205155	9.19837e-05	0.000273745	5	PI3K cat class IA, ACTA2, Endothelin-1, TGF-beta 1, ERK1/2
488	IL-6 signaling in tumor-associated monocytes/macrophages in breast cancer	14	4.4812e-05	0.000144822	4.4812e-05	0.000144822	4	MMP-9, TGF-beta 1, VEGF-A, IL-6
489	LKB1 signaling pathway in lung cancer cells	45	4.51132e-05	0.0001721	5.46394e-05	0.0001721	6	NF-kB, TGF-beta 1, ERK1/2, AMPK alpha subunit, c-Myc, HIF1A
490	Role of alpha-6/beta-4 integrins in carcinoma progression	45	4.51132e-05	0.000205202	0.00463264	0.00899705	4	PI3K cat class IA, ErbB2, VEGF-A, HGF receptor (Met)
491	Regulation of metabolism_Triiodothyronine and Thyroxine signaling	45	4.51132e-05	0.000205202	0.0302716	0.0461511	3	PI3K cat class IA (p110-alpha), HIF1A, FASN
492	Role of DNA methylation in progression of multiple myeloma	45	4.51132e-05	0.000205202	0.147767	0.187313	2	NF-kB, IL-6
493	Activation of TGF-beta signaling in pancreatic cancer	27	4.58965e-05	0.000146798	4.58965e-05	0.000146798	5	PAI1, ICAM1, TGF-beta 1, VEGF-A, ERK2 (MAPK1)
494	Apoptosis and survival_Anti-apoptotic TNFs/NF-kB/IAP pathway	27	4.58965e-05	0.000146798	4.58965e-05	0.000146798	5	I-kB, NF-kB, IKK-gamma, RelA (p65 NF-kB subunit), TNF-alpha
495	Role of CD8+ Tc1 cells in COPD	44	4.79501e-05	0.000152135	4.79501e-05	0.000152135	6	NF-kB, Bcl-2, MMP-9, Leptin, CCL2, TNF-alpha
496	TGF-beta-induced fibroblast/ myofibroblast migration and extracellular matrix production in asthmatic airways	64	4.80556e-05	0.000152135	4.80556e-05	0.000152135	7	PI3K cat class IA, MMP-9, Endothelin-1, PAI1, TGF-beta 1, ERK1/2, MMP-2
497	Serotonin - melatonin biosynthesis and metabolism	46	5.22419e-05	0.000234373	0.504219	0.526713	1	CYP1A2
498	Development_Endothelin-1/EDNRA transactivation of EGFR	46	5.22419e-05	0.000234373	0.0320337	0.0486582	3	PI3K cat class IA, Endothelin-1, ERK1/2
499	Stem cells_Putative pathways of telomerase regulation in glioblastoma stem cells	20	5.34143e-05	0.00023712	0.0360864	0.0539557	2	PI3K cat class IA, c-Myc
500	Regulation of caspase activity in Huntington's disease	20	5.34143e-05	0.00023712	0.0360864	0.0539557	2	Caspase-3, HSP70
501	Cell cycle_Role of Nek in cell cycle regulation	32	5.37592e-05	0.00023712	0.0121957	0.0206478	3	PI3K cat class IA, Insulin processed, Aurora-A
502	Inhibition of LKB1 / AMPK signaling in breast cancer	32	5.37592e-05	0.00023712	0.0013019	0.00294829	4	GSK3 beta, IL-6, HIF1A, FASN
503	DNA damage_ATM/ATR regulation of G1/S checkpoint	32	5.37592e-05	0.00023712	0.000107693	0.000315205	5	I-kB, NF-kB, ATR, Ubiquitin, c-Myc
504	Proinflammatory mediators production and activation of basophils in asthma	45	5.46394e-05	0.0001721	5.46394e-05	0.0001721	6	PI3K cat class IA, I-kB, NF-kB, ERK1/2, Leptin, HIF1A
505	Role of Th17 cells in asthma	28	5.51942e-05	0.000173408	5.51942e-05	0.000173408	5	NF-kB, VCAM1, ICAM1, TGF-beta 1, ERK1/2
506	CHDI_DEGs from Replication data_Causal network	81	5.91721e-05	0.000260119	0.0075642	0.0137239	5	I-kB, GSK3 beta, ERK1/2, PKC, NF-kB1 (p50)
507	Immune response_KLRK1 (NKG2D) signaling pathway	47	6.02672e-05	0.000216335	7.02522e-05	0.000216335	6	PI3K cat class IA, Syk, ERK1/2, Lck, Fyn, ZAP70
508	TGF-beta signaling via SMADs in breast cancer	47	6.02672e-05	0.000260561	0.000683195	0.00163993	5	MMP-9, PAI1, TGF-beta 1, CTGF, VEGF-A
509	Development_HGF signaling pathway	47	6.02672e-05	0.000260561	0.00541795	0.0102816	4	PI3K cat class IA, GSK3 beta, ERK1/2, HGF receptor (Met)
510	Regulation of GSK3 beta in bipolar disorder	46	6.20547e-05	0.000194469	6.20547e-05	0.000194469	6	FGFR1, GSK3 beta, TrkB, ERK1/2, IL-1 beta, TrkC
511	Resistance of pancreatic cancer cells to death receptor signaling	33	6.45287e-05	0.00027535	0.000125382	0.000361019	5	Caspase-3, RelA (p65 NF-kB subunit), PRKD1, NFKBIA, Bax
512	SHH signaling in melanoma	33	6.45287e-05	0.00027535	0.000125382	0.000361019	5	MMP-9, TGF-beta 1, PDGF-R-alpha, MMP-2, PI3K cat class IA (p110-alpha)
513	Role of neuropeptides in pathogenesis of SCLC	67	6.47614e-05	0.000201932	6.47614e-05	0.000201932	7	ErbB2, ERK1/2, PKC, FGR, p90Rsk, Fyn, PI3K cat class IA (p110-alpha)
514	Development_Thrombopoietin signaling via ERK1/2 and PI3K	67	6.47614e-05	0.000201932	6.47614e-05	0.000201932	7	PI3K cat class IA, GSK3 beta, ERK1/2, RelA (p65 NF-kB subunit), VEGF-A, c-Myc, HIF1A
515	Bone metastases in Prostate Cancer	29	6.58818e-05	0.000204398	6.58818e-05	0.000204398	5	ErbB2, MMP-9, Endothelin-1, VEGF-A, CCL2
516	Immune response_CD137 signaling in immune cell	29	6.58818e-05	0.000204398	6.58818e-05	0.000204398	5	MEK3(MAP2K3), NF-kB, Bcl-2, ERK1/2, NFKBIA
517	Cell cycle_Chromosome condensation in prometaphase	21	6.88785e-05	0.000290858	0.0394964	0.058771	2	Aurora-B, Aurora-A
518	Development_Adiponectin signaling	48	6.92732e-05	0.000240588	7.92911e-05	0.000240588	6	PI3K cat class IA, Caspase-3, ERK1/2, AMPK alpha subunit, IL-6, eNOS
519	Immune response_IL-12 signaling pathway	48	6.92732e-05	0.000290858	0.000753416	0.001805	5	PI3K cat class IA, iNOS, Ubiquitin, c-Myc, Lck
520	Development_Role of Thyroid hormone in regulation of oligodendrocyte differentiation	48	6.92732e-05	0.000290858	0.163655	0.206399	2	PDGF-R-alpha, PI3K cat class IA (p110-alpha)
521	Immune response_MIF - the neuroendocrine-macrophage connector	47	7.02522e-05	0.000216335	7.02522e-05	0.000216335	6	CD74, Casein kinase II, alpha chains, MIF, TLR4, ERK1/2, PKC
522	Immune response_Fc epsilon RI pathway: calcium-dependent signaling	68	7.12833e-05	0.000218967	7.12833e-05	0.000218967	7	Syk, GSK3 beta, PIP5KI, ERK1/2, FGR, Fyn, Lyn
523	Signal transduction_mTORC2 upstream signaling	65	7.33e-05	0.000305806	0.0166886	0.0273949	4	PI3K cat class IA, HSP70, Insulin processed, PI3K cat class IA (p110-alpha)
524	Neurophysiological process_Constitutive and regulated NMDA receptor trafficking	65	7.33e-05	0.000305806	0.0751122	0.103918	3	Casein kinase II, alpha chains, PKC, Fyn
525	Development_CNTF receptor signaling	34	7.69532e-05	0.000318008	0.0930081	0.12587	2	PI3K cat class IA, ERK1/2
526	Role of prenatal nicotine exposure in apoptosis and proliferation of pancreatic beta cells	30	7.80969e-05	0.000238128	7.80969e-05	0.000238128	5	Caspase-3, Bcl-2, GPX1, Insulin processed, Bax
527	Colorectal cancer (general schema)	30	7.80969e-05	0.000238128	7.80969e-05	0.000238128	5	TGF-beta 1, IL-6, Leptin, TNF-alpha, HGF receptor (Met)
528	IgE- and MGF-induced Fyn-mediated activation of lung mast cells in asthma	49	7.93488e-05	0.000323822	0.000828892	0.00196308	5	c-Kit, Syk, Fyn, Lyn, PI3K cat class IA (p110-alpha)
529	Demyelination in multiple sclerosis	49	7.93488e-05	0.000268132	8.92331e-05	0.000268132	6	MEK3(MAP2K3), Caspase-3, iNOS, MMP-9, TNF-alpha, PAK2
530	Signal transduction_IP3 signaling	49	7.93488e-05	0.000268132	8.92331e-05	0.000268132	6	PI3K cat class IA, Syk, PDGF receptor, ERK1/2, ZAP70, HGF receptor (Met)
531	Tissue Factor signaling in cancer via PAR1 and PAR2	49	7.93488e-05	0.000323822	0.0376347	0.0562029	3	PI3K cat class IA, ERK1/2, VEGF-A
532	c-Myc in multiple myeloma	16	7.957e-05	0.000240845	7.957e-05	0.000240845	4	VEGF-A, IL-6, c-Myc, HIF1A
533	EGF- and HGF-dependent stimulation of metastasis in gastric cancer	22	8.75766e-05	0.000353001	0.0042277	0.00828843	3	ERK1/2, HGF receptor (Met), HIF1A
534	Role of Huntingtin in regulation of BDNF in Huntington's disease	22	8.75766e-05	0.000353001	0.0042277	0.00828843	3	PI3K cat class IA, Calcipressin 1, RelA (p65 NF-kB subunit)
535	Th17 cells in CF (mouse model)	49	8.92331e-05	0.000268132	8.92331e-05	0.000268132	6	NF-kB, TLR4, ICAM1, TGF-beta 1, IL-1 beta, IL-6
536	Cigarette smoke-induced proliferation, metaplasia and survival of airway epithelial cells	50	9.05885e-05	0.000360124	0.000909864	0.00212644	5	PI3K cat class IA, MMP-9, ERK1/2, p90Rsk, MMP-2
537	Development_Angiopoietin - Tie2 signaling	35	9.12121e-05	0.000360124	0.00016736	0.000466728	5	PI3K cat class IA, I-kB, NF-kB, IKK-gamma, Angiopoietin 2
538	Apoptosis and survival_Role of IAP-proteins in apoptosis	31	9.19837e-05	0.000273745	9.19837e-05	0.000273745	5	Caspase-3, Ubiquitin, HSP70, TNF-alpha, Bax
539	Development_Transactivation of PDGFR in non-neuronal cells by Dopamine D2 receptor	31	9.19837e-05	0.000273745	9.19837e-05	0.000273745	5	PI3K cat class IA, ERK1 (MAPK3), PDGF receptor, ERK2 (MAPK1), PDGF-R-beta
540	Stem cells_Stimulation of differentiation of mouse embryonic fibroblasts into adipocytes by extracellular factors	71	9.41377e-05	0.000279485	9.41377e-05	0.000279485	7	ERK1 (MAPK3), ERK1/2, ERK2 (MAPK1), Leptin, Insulin processed, p90RSK2(RPS6KA3), PI3K cat class IA (p110-alpha)
541	Neurophysiological process_Leptin signaling in neurons	50	0.000100143	0.000295897	0.000100143	0.000295897	6	Casein kinase II, alpha chains, GSK3 beta, AMPK alpha subunit, Leptin, PI3K cat class IA (p110-alpha), AMPK alpha 2 subunit
542	Immune response_Sublytic effects of membrane attack complex	68	0.000101535	0.000398238	0.000551153	0.00136796	6	MEK3(MAP2K3), eIF2AK3, TGF-beta 1, ERK1/2, PKC, IL-6
543	Production of reactive oxygen species and arachidonic acid metabolites by neutrophils in asthma	68	0.000101535	0.000398238	0.019391	0.0312229	4	PI3K cat class IA, ERK1/2, PKC, TNF-alpha
544	Involvement of VEGF signaling in the progression of lung cancer	17	0.000102829	0.000303115	0.000102829	0.000303115	4	ERK1/2, VEGFR-1, VEGF-A, Fyn
545	Development_Lipoxin inhibitory action on PDGF, EGF and LTD4 signaling	36	0.000107496	0.000417863	0.422393	0.460219	1	PDGF-R-beta
546	Apoptosis and survival_Beta-2 adrenergic receptor anti-apoptotic action	23	0.000109945	0.000423614	0.295642	0.346451	1	PI3K cat class IA (p110-alpha)
547	KLF6 and regulation of KLF6 alternative splicing in HCC	23	0.000109945	0.000423614	0.00480839	0.00928027	3	PI3K cat class IA, Caspase-3, Bax
548	Transcription_Negative regulation of HIF1A function	69	0.00011274	0.000431842	0.0203483	0.0326679	4	GSK3 beta, Ubiquitin, HSP70, HIF1A
549	Immune response_Antigen presentation by MHC class I: cross-presentation	99	0.00012338	0.000358583	0.00012338	0.000358583	8	IRAK4, CD74, Syk, HSPA1A, Connexin 43, TLR4, UFO, HSP70
550	Cell adhesion_Integrin inside-out signaling in T cells	52	0.000125134	0.000361019	0.000125134	0.000361019	6	ITGB2, VCAM1, PIP5KI, ICAM1, Lck, ZAP70
551	Development_Beta-adrenergic receptors transactivation of EGFR	37	0.000126007	0.000477077	0.00225489	0.00475142	4	PI3K cat class IA, ERK1 (MAPK3), ERK1/2, ERK2 (MAPK1)
552	Immune response_IL-7 signaling in T lymphocytes	37	0.000126007	0.000477077	0.00225489	0.00475142	4	Bcl-2, Lck, Fyn, PI3K cat class IA (p110-alpha)
553	Development_Role of proteases in hematopoietic stem cell mobilization	18	0.000130655	0.000375331	0.000130655	0.000375331	4	c-Kit, MMP-9, VCAM1, MMP-2
554	ENaC regulation in normal and CF airways	53	0.000132314	0.000493821	0.00829468	0.0149184	4	PI3K cat class IA, Endothelin-1, ERK1/2, AMPK alpha subunit
555	Development_Insulin, IGF-1 and TNF-alpha in brown adipocyte differentiation	53	0.000132314	0.000493821	0.00829468	0.0149184	4	ERK1/2, Insulin processed, TNF-alpha, FASN
556	Development_Endothelin-1/EDNRA signaling	53	0.000132314	0.000493821	0.00829468	0.0149184	4	PI3K cat class IA, GSK3 beta, Endothelin-1, ERK1/2
557	Notch signaling in breast cancer	53	0.000132314	0.000493821	0.0458263	0.0672228	3	VEGF-A, c-Myc, Bax
558	Development_Adenosine A3 receptor signaling	53	0.000132314	0.00039666	0.000139358	0.00039666	6	I-kB, NF-kB, ERK1 (MAPK3), GSK3 beta, c-Myc, HIF1A
559	Development_NCAM1-mediated neurite outgrowth, synapse assembly and neuronal survival	75	0.000133555	0.000382776	0.000133555	0.000382776	7	FGFR1, GluR1, ERK1/2, PKC, Fyn, nNOS, GDNF
560	Tissue factor signaling in lung cancer	24	0.00013645	0.000506372	0.00543492	0.0102816	3	ERK1/2, VEGF-A, PI3K cat class IA (p110-alpha)
561	Prolactin/ JAK2 signaling in breast cancer	24	0.00013645	0.000506372	0.306304	0.356588	1	GSK3 beta
562	Chemotaxis_Inhibitory action of lipoxins on IL-8- and Leukotriene B4-induced neutrophil migration	53	0.000139358	0.00039666	0.000139358	0.00039666	6	Alpha-actinin, ITGB2, PIP5KI, ICAM1, ERK1/2, Actin
563	Chemotaxis_CCR1 signaling	53	0.000139358	0.00039666	0.000139358	0.00039666	6	I-kB, NF-kB, MMP-9, ERK1/2, IL-6, CCL13
564	Signal transduction_Erk Interactions: Inhibition of Erk	34	0.000145214	0.00041075	0.000145214	0.00041075	5	ERK1/2, PKC, ERK2 (MAPK1), Lck, ZAP70
565	Proinflammatory cytokine release from eosinophils in asthma	34	0.000145214	0.00041075	0.000145214	0.00041075	5	MIF, ERK1/2, IL-1 beta, IL-6, TNF-alpha
566	Apoptosis and survival_Anti-apoptotic action of membrane-bound ESR1	38	0.000146957	0.000542293	0.000249465	0.000664348	5	PI3K cat class IA, Bcl-2, ERK1/2, eNOS, Bax
567	Growth factors in regulation of oligodendrocyte precursor cells proliferation in multiple sclerosis	54	0.000149259	0.000434725	0.000154834	0.000434725	6	PI3K cat class IA, FGFR1, ERK1/2, PKC, PDGF-R-alpha, HGF receptor (Met)
568	Regulation of lipid metabolism_Stimulation of Arachidonic acid production by ACM receptors	72	0.000152649	0.000560142	0.0951851	0.128676	3	MEK3(MAP2K3), ERK1/2, PKC
569	Role of IL-23/ T17 pathogenic axis in psoriasis	54	0.000154834	0.000434725	0.000154834	0.000434725	6	NF-kB, Calgranulin A, ERK1/2, Calgranulin B, IL-1 beta, IL-6
570	Development_TGF-beta-dependent induction of EMT via SMADs	35	0.00016736	0.000466728	0.00016736	0.000466728	5	Endothelin-1, PAI1, TGF-beta 1, TGF-beta, MMP-2
571	Langerhans cell migration to lymph nodes in allergic contact dermatitis	35	0.00016736	0.000466728	0.00016736	0.000466728	5	MMP-9, ICAM1, TGF-beta 1, IL-1 beta, TNF-alpha
572	Aberrant B-Raf signaling in melanoma progression	55	0.000167921	0.000476516	0.000171638	0.000476516	6	Aurora-B, Bcl-2, ERK1/2, AMPK alpha subunit, ERK2 (MAPK1), p90Rsk
573	Role of Thyroid hormone in regulation of oligodendrocyte differentiation in multiple sclerosis	55	0.000167921	0.000607669	0.201743	0.249118	2	PDGF-R-alpha, PI3K cat class IA (p110-alpha)
574	Deregulation of Ca2+-dependent neuronal cell survival in Huntington's disease	39	0.000170572	0.000610519	0.00274318	0.00570696	4	PI3K cat class IA, GSK3 beta, Calcipressin 1, nNOS
575	Proteases and EGFR-induced mucin synthesis in normal and asthmatic epithelium	55	0.000171638	0.000476516	0.000171638	0.000476516	6	NF-kB, ICAM1, ERK1/2, NFKBIA, TNF-alpha, HIF1A
576	Cell cycle_Nucleocytoplasmic transport of CDK/Cyclins	14	0.000178547	0.000637321	0.018334	0.0297031	2	ERK1 (MAPK3), GSK3 beta
577	E-cadherin signaling and its regulation in gastric cancer	36	0.000191995	0.000525972	0.000191995	0.000525972	5	Alpha-actinin, GSK3 beta, Ubiquitin, Actin, HGF receptor (Met)
578	HBV signaling via protein kinases leading to HCC	36	0.000191995	0.000525972	0.000191995	0.000525972	5	MMP-9, ERK1/2, PKC, ERK2 (MAPK1), c-Myc
579	Development_Thrombospondin 1 signaling	36	0.000191995	0.000525972	0.000191995	0.000525972	5	Caspase-3, TGF-beta 1, VEGF-A, eNOS, Fyn
580	Stem cells_Pancreatic cancer stem cells in tumor metastasis	40	0.000197088	0.000697798	0.456622	0.484745	1	Fyn
581	Role of Langerin+ dermal dendritic cells in contact hypersensitivity	20	0.000202039	0.00055227	0.000202039	0.00055227	4	ITGB2, FLT3, CCL2, P-selectin
582	Cell adhesion_Cadherin-mediated cell adhesion	26	0.000203856	0.00071788	0.0068292	0.0124085	3	Fyn, Actin, HGF receptor (Met)
583	Role of nicotine in pathogenesis of SCLC	57	0.000209557	0.000571562	0.000209557	0.000571562	6	Bcl-2, ERK1/2, VEGF-A, c-Myc, PKC-lambda/iota, Bax
584	Development_Non-genomic action of Retinoic acid in cell differentiation	57	0.000210908	0.00073677	0.00165161	0.00360218	5	ERK1/2, VEGF-A, p90RSK2(RPS6KA3), p90Rsk, HIF1A
585	Regulation of lipid metabolism_Insulin regulation of glycogen metabolism	57	0.000210908	0.00073677	0.00165161	0.00360218	5	PI3K cat class IA, GSK3 alpha/beta, ERK1/2, HXK4, Insulin processed
586	Immune response_Oncostatin M signaling via MAPK	37	0.000219301	0.000595519	0.000219301	0.000595519	5	MEK3(MAP2K3), ERK1 (MAPK3), ERK1/2, ERK2 (MAPK1), CCL2
587	G-protein signaling_H-RAS regulation pathway	37	0.000219301	0.000595519	0.000219301	0.000595519	5	PI3K cat class IA, PDGF-R-beta, Lck, RET, GDNF
588	Gamma-secretase proteolytic targets	76	0.000223302	0.000777994	0.686726	0.691742	1	VEGFR-1
589	Development_Neurotrophin family signaling	41	0.000226751	0.000787913	0.000359071	0.000928348	5	PI3K cat class IA, TrkB, ERK1/2, TrkC, Bax
590	Effect of H. pylori infection on gastric epithelial cell proliferation	58	0.000230841	0.000622768	0.000230841	0.000622768	6	c-Abl, TLR4, ERK1/2, c-Myc, Lyn, HGF receptor (Met)
591	Neurophysiological process_NMDA-dependent postsynaptic long-term potentiation in CA1 hippocampal neurons	82	0.000234121	0.000628884	0.000234121	0.000628884	7	ERK1 (MAPK3), GluR1, ERK1/2, ERK2 (MAPK1), p90Rsk, eNOS, PI3K cat class IA (p110-alpha)
592	Hyaluronic acid/ CD44 signaling in cancer	58	0.000235504	0.000816165	0.0571951	0.0818676	3	MMP-9, ERK2 (MAPK1), PI3K cat class IA (p110-alpha)
593	Pancreatic cancer cell resistance to Tarceva (erlotinib)	27	0.000245818	0.000842989	0.0622653	0.0879081	2	PI3K cat class IA, ErbB2
594	Brca1 in ovarian cancer	27	0.000245818	0.000842989	0.000673861	0.00162697	4	Caspase-3, Ubiquitin, NF-kB1 (p105), Bax
595	Th2-cytokines and IFN-mediated regulation of airway smooth muscle contraction	27	0.000245818	0.000842989	0.0622653	0.0879081	2	RelA (p65 NF-kB subunit), TNF-alpha
596	Multiple sclerosis (general schema)	21	0.000246648	0.000661102	0.000246648	0.000661102	4	VCAM1, ICAM1, TGF-beta 1, TNF-alpha
597	Dysregulation of Adiponectin secretion from adipocytes in obesity, type 2 diabetes and metabolic syndrome X	38	0.000249465	0.000664348	0.000249465	0.000664348	5	CRP, NF-AT3(NFATC4), ERK1/2, Insulin processed, TNF-alpha
598	Translation_Insulin regulation of translation	42	0.000259819	0.000886362	0.0036043	0.00724949	4	PI3K cat class IA, GSK3 beta, ERK1/2, Insulin processed
599	Apoptosis and survival_TNF-alpha-induced ROS-dependent Caspase-3 signaling	60	0.000278497	0.000738492	0.000278497	0.000738492	6	MEK3(MAP2K3), Caspase-3, Bcl-2, GPX1, TNF-alpha, Bax
600	Immune response_Th17, Th22 and Th9 cell differentiation	39	0.000282682	0.000743237	0.000282682	0.000743237	5	NF-kB, TGF-beta 1, IL-1 beta, IL-6, TNF-alpha
601	Development_PACAP signaling in neural cells	39	0.000282682	0.000743237	0.000282682	0.000743237	5	Caspase-3, Bcl-2, ERK1/2, p90RSK2(RPS6KA3), Bax
602	Role of iNKT and B cells in T cell recruitment in allergic contact dermatitis	39	0.000282682	0.000743237	0.000282682	0.000743237	5	NF-kB, VCAM1, ICAM1, TNF-alpha, Thy-1
603	Cell cycle_Regulation of G1/S transition (part 2)	28	0.000294034	0.000987651	0.00841722	0.0150299	3	GSK3 beta, ERK1/2, RelA (p65 NF-kB subunit)
604	DNA damage_ATM / ATR regulation of G2 / M checkpoint	28	0.000294034	0.000987651	0.0664075	0.0933314	2	ATR, Ubiquitin
605	Th1 and Th17 cells in an autoimmune mechanism of emphysema formation in smokers	28	0.000294034	0.000987651	0.347372	0.394769	1	MMP-9
606	Immune response_IL-7 signaling in B lymphocytes	43	0.000296562	0.000988542	0.00045012	0.00113768	5	Pim-1, ERK1/2, Fyn, Lyn, PI3K cat class IA (p110-alpha)
607	Apoptosis and survival_Anti-apoptotic action of Gastrin	43	0.000296562	0.000988542	0.0039278	0.00777417	4	PI3K cat class IA, Bcl-2, ERK1/2, Bax
608	Development_Mu-type opioid receptor signaling via Beta-arrestin	22	0.000297921	0.000780001	0.000297921	0.000780001	4	ERK1 (MAPK3), ERK1/2, ERK2 (MAPK1), p90Rsk
609	Activation of Cortisol production in major depressive disorder	40	0.000319149	0.000833818	0.000319149	0.000833818	5	CYP11B2, ERK1/2, IL-6, CYP11B1, TNF-alpha
610	Role of IFN-beta in activation of T cell apoptosis in multiple sclerosis	29	0.000349092	0.00115483	0.357255	0.402682	1	Caspase-3
611	Action of GSK3 beta in bipolar disorder	23	0.000356412	0.000925329	0.000356412	0.000925329	4	Bcl-2, GSK3 beta, c-Myc, Bax
612	Role of Leptin in regulation of eating behavior in obesity	23	0.000356412	0.000925329	0.000356412	0.000925329	4	NF-kB p50/p65, ERK1/2, AMPK alpha subunit, Leptin
613	Immune response_Neurotensin-induced activation of IL-8 in colonocytes	41	0.000359071	0.000928348	0.000359071	0.000928348	5	I-kB, NF-kB, ERK1 (MAPK3), RelA (p65 NF-kB subunit), ERK2 (MAPK1)
614	HETE and HPETE biosynthesis and metabolism	82	0.000377721	0.00124325	0.714247	0.717717	1	GPX1
615	Degranulation of lung mast cells	63	0.000395475	0.00129843	0.0025782	0.00539552	5	PI3K cat class IA, c-Kit, Syk, Fyn, Lyn
616	Immune response_PIP3 signaling in B lymphocytes	42	0.000402657	0.00103672	0.000402657	0.00103672	5	PI3K cat class IA, CD45, Syk, p90Rsk, Lyn
617	LRRK2 in neuronal apoptosis in Parkinson's disease	17	0.000403394	0.00131454	0.0266022	0.0415262	2	Caspase-3, KCRU
618	Development_Osteopontin signaling in osteoclasts	30	0.000411606	0.00132809	0.0102045	0.0176869	3	Syk, PIP5KI, PI3K cat class IA (p110-alpha)
619	Development_Slit-Robo signaling	30	0.000411606	0.00132809	0.0102045	0.0176869	3	c-Abl, Fyn, Actin
620	DNA damage_Brca1 as a transcription regulator	30	0.000411606	0.00132809	0.0102045	0.0176869	3	ATR, VEGF-A, c-Myc
621	Immune response_Antigen presentation by MHC class II	118	0.000413507	0.00106245	0.000413507	0.00106245	8	PI3K cat class IA, CD74, Syk, Bcl-2, TLR4, ERK1/2, PKC, PIP5K1A
622	T follicular helper cell dysfunction in SLE	90	0.000415849	0.00106626	0.000415849	0.00106626	7	PI3K cat class IA, I-kB, NF-kB, IKK-gamma, IL-6, Fyn, PKC-theta
623	Immune response_IL-27 signaling pathway	24	0.000422681	0.00107931	0.000422681	0.00107931	4	NF-kB, Pim-1, ICAM1, c-Myc
624	Cytoskeleton remodeling_Role of PDGFs in cell migration	24	0.000422681	0.00107931	0.000422681	0.00107931	4	PI3K cat class IA, PDGF receptor, PDGF-R-alpha, PDGF-R-beta
625	Immune response_Naive CD4+ T cell differentiation	46	0.000431702	0.00137934	0.000617988	0.00150377	5	NF-kB, TGF-beta 1, IL-1 beta, IL-6, TNF-alpha
626	High shear stress-induced platelet activation	46	0.000431702	0.00137934	0.0320337	0.0486582	3	Alpha-actinin, UFO, P-selectin
627	FGF signaling in Prostate Cancer	43	0.00045012	0.00113768	0.00045012	0.00113768	5	PI3K cat class IA, ERK1 (MAPK3), FGFR1, ERK2 (MAPK1), FGFR4
628	Role of platelets in allograft rejection	43	0.00045012	0.00113768	0.00045012	0.00113768	5	ICAM1, IL-1 beta, TGF-beta, TNF-alpha, P-selectin
629	Canonical WNT signaling pathway in colorectal cancer	66	0.000469046	0.0011831	0.000469046	0.0011831	6	PI3K cat class IA, iNOS, GSK3 beta, VEGF-A, c-Myc, HGF receptor (Met)
630	SHH signaling in colorectal cancer	31	0.000482208	0.00150885	0.0111744	0.0192069	3	Bcl-2, PDGF-R-alpha, c-Myc
631	Development_Inhibition of angiogenesis by PEDF	31	0.000482208	0.00150885	0.00115263	0.00264401	4	Caspase-3, VEGFR-1, VEGF-A, Bax
632	Immune response_PGE2 in immune and neuroendocrine system interactions	47	0.000486059	0.00150885	0.000683195	0.00163993	5	NF-kB, NF-kB p50/p65, TLR4, IL-1 beta, TNF-alpha
633	Development_Hedgehog signaling	47	0.000486059	0.00150885	0.0338484	0.0509162	3	GSK3 beta, Ubiquitin, Casein kinase I
634	Immune escape mechanisms in Prostate Cancer	25	0.000497295	0.00124424	0.000497295	0.00124424	4	TLR4, IL-6, TGF-beta, CCL2
635	Role of keratinocytes and Langerhans cells in skin sensitization	25	0.000497295	0.00124424	0.000497295	0.00124424	4	I-kB, NF-kB p50/p65, IL-1 beta, TNF-alpha
636	Immune response_T cell subsets: secreted signals	25	0.000497295	0.00124424	0.000497295	0.00124424	4	IL-1 alpha, IL-6, TGF-beta, TNF-alpha
637	Influence of smoking on activation of EGFR signaling in lung cancer cells	44	0.000501681	0.00125017	0.000501681	0.00125017	5	ERK1 (MAPK3), MMP-9, ERK1/2, ERK2 (MAPK1), MMP-2
638	Neuroendocrine transdifferentiation in Prostate Cancer	48	0.000545599	0.00168173	0.0357155	0.0536597	3	ERK1 (MAPK3), ERK2 (MAPK1), IL-6
639	Role of cell adhesion molecules in progression of pancreatic cancer	45	0.000557561	0.00137561	0.000557561	0.00137561	5	Caspase-3, iNOS, ERK1/2, IL-1 beta, c-Myc
640	Cytoskeleton remodeling_Fibronectin-binding integrins in cell motility	32	0.00056155	0.00171876	0.0121957	0.0206478	3	PI3K cat class IA, Alpha-actinin, Fyn
641	Cytoskeleton remodeling_Reverse signaling by Ephrin-B	32	0.00056155	0.00171876	0.386021	0.429643	1	GSK3 beta
642	Stem cells_Hypothetical role of microRNAs in fibrosis development after myocardial infarction	26	0.000580829	0.00142171	0.000580829	0.00142171	4	PI3K cat class IA, TGF-beta 1, CTGF, MMP-2
643	Role of fibroblasts and keratinocytes in the elicitation phase of allergic contact dermatitis	26	0.000580829	0.00142171	0.000580829	0.00142171	4	IL-1 alpha, IL-1 beta, CCL2, TNF-alpha
644	Pioglitazone and Rosiglitazone in treatment of type 2 diabetes and metabolic syndrome X	26	0.000580829	0.00142171	0.000580829	0.00142171	4	HXK4, IL-6, Insulin processed, TNF-alpha
645	Downregulation of MITF in melanoma	26	0.000580829	0.00142171	0.000580829	0.00142171	4	NF-kB, TGF-beta 1, IL-1 beta, IL-6
646	Development_Melanocyte development and pigmentation	49	0.000610658	0.00183899	0.00628761	0.0115257	4	PI3K cat class IA, c-Kit, GSK3 beta, ERK1/2
647	Role and regulation of Prostaglandin E2 in gastric cancer	49	0.000610658	0.00183899	0.000828892	0.00196308	5	ERK1/2, IL-1 beta, VEGF-A, CCL2, HIF1A
648	Transcription_CREB signaling pathway	49	0.000610658	0.00183899	0.000828892	0.00196308	5	MEK3(MAP2K3), PI3K cat class IA, LDHA, ERK1/2, p90Rsk
649	DNA damage_NHEJ mechanisms of DSBs repair	19	0.000635015	0.00189924	0.251338	0.301947	1	Casein kinase II, alpha chains
650	Cytoskeleton remodeling_Alpha-1A adrenergic receptor-dependent inhibition of PI3K	19	0.000635015	0.00189924	0.251338	0.301947	1	PI3K cat class IA (p110-alpha)
651	Immune response_IL-4-responsive genes in type 2 immunity	70	0.000644019	0.00156405	0.000644019	0.00156405	6	ACTA2, NF-kB p50/p65, VCAM1, CCL2, CCL13, P-selectin
652	Deficient alpha-MSH signaling in melanoma	33	0.000650304	0.00193174	0.0132688	0.0222221	3	PI3K cat class IA, GSK3 beta, ERK1/2
653	Immune response_TLR3 and TLR4 induced TICAM1-specific signaling pathway	33	0.000650304	0.00193174	0.00146418	0.00326808	4	PI3K cat class IA, NF-kB, TLR4, IKK-gamma
654	Insulin-dependent stimulation of SREBP-1 in type 2 diabetes in liver	27	0.000673861	0.00162697	0.000673861	0.00162697	4	Insulin processed, PKC-lambda/iota, PI3K cat class IA (p110-alpha), FASN
655	Regulatory T cells in murine model of contact hypersensitivity	27	0.000673861	0.00162697	0.000673861	0.00162697	4	NF-kB, ICAM1, TNF-alpha, P-selectin
656	Th9 cells in asthma	47	0.000683195	0.00163993	0.000683195	0.00163993	5	GSK3 beta, TGF-beta 1, RelA (p65 NF-kB subunit), TGF-beta, CCL13
657	Nicotine / Beta-adrenergic signaling in lung cancer	34	0.000749158	0.00218574	0.0930081	0.12587	2	ERK1/2, Bax
658	Apoptosis and survival_Caspase cascade	34	0.000749158	0.00218574	0.0143942	0.0238176	3	Caspase-3, TNF-alpha, Bax
659	Apoptosis and survival_IL-17-induced CIKS-dependent NF-kB signaling and mRNA stabilization	28	0.000776972	0.00185427	0.000776972	0.00185427	4	I-kB, NF-kB p50/p65, Ubiquitin, IKK-gamma
660	Development_FGF2-dependent induction of EMT	20	0.000780415	0.00224691	0.00319965	0.00656326	3	PI3K cat class IA, FGFR1, IL-1 beta
661	CCL2 in Prostate Cancer	20	0.000780415	0.00224691	0.0360864	0.0539557	2	VEGF-A, CCL2
662	Development_G-CSF signaling	49	0.000828892	0.00196308	0.000828892	0.00196308	5	PI3K cat class IA, Bcl-2, ERK1/2, c-Myc, Lyn
663	Nicotine signaling in cholinergic neurons	52	0.000842413	0.00240952	0.00775834	0.0140147	4	PI3K cat class IA, GSK3 beta, ERK2 (MAPK1), nNOS
664	Estrone metabolism	35	0.000858816	0.00241946	0.413506	0.452523	1	CYP1A2
665	Extracellular matrix-regulated proliferation of airway smooth muscle cells in asthma	35	0.000858816	0.00241946	0.00183007	0.00393607	4	PI3K cat class IA, TGF-beta 1, CTGF, ERK1/2
666	Development_Growth hormone signaling via STATs and PLC/IP3	35	0.000858816	0.00241946	0.413506	0.452523	1	Fyn
667	Pro-oncogenic action of PTHrP in breast cancer	29	0.000890747	0.00209756	0.000890747	0.00209756	4	Bcl-2, ERK1/2, VEGF-A, Bax
668	Modulation of tumor response to cytotoxic T cells by hypoxia in tumors	50	0.000909864	0.00212644	0.000909864	0.00212644	5	Bcl-2, Ubiquitin, ERK1/2, VEGF-A, HIF1A
669	Proliferative action of Gastrin in gastric cancer	53	0.000933064	0.00261178	0.00118824	0.00271066	5	PI3K cat class IA, ERK1/2, PKC, c-Myc, p90Rsk
670	Higher ESR1 / ESR2 ratio in breast cancer	36	0.000979996	0.00269705	0.00203483	0.00433887	4	ErbB2, VEGF-A, c-Myc, HIF1A
671	Statin action on the PI3K/ Akt pathway in COPD	36	0.000979996	0.00269705	0.10246	0.136138	2	PI3K cat class IA, eNOS
672	CHDI_Correlations from Discovery data_Causal network (positive)	36	0.000979996	0.00269705	0.10246	0.136138	2	MMP-2, Actin
673	Stem cells_Endothelial differentiation during embryonic development	51	0.000996579	0.00231196	0.000996579	0.00231196	5	PI3K cat class IA, ERK1/2, PKC, VEGF-A, Angiopoietin 2
674	Development_Oligodendrocyte differentiation from adult stem cells	51	0.000996579	0.00231196	0.000996579	0.00231196	5	FGFR1, Endothelin-1, ERK1/2, PDGF-R-alpha, p90Rsk
675	Nociception_Nociceptin receptor signaling	76	0.000996696	0.00231196	0.000996696	0.00231196	6	ERK1 (MAPK3), NF-kB p50/p65, ERK1/2, PKC, p90Rsk, Actin
676	Inhibition of mast cell functions by Fc gamma RII beta in asthma	30	0.00101577	0.00234743	0.00101577	0.00234743	4	c-Kit, Syk, Lyn, PI3K cat class IA (p110-alpha)
677	Androstenedione and testosterone biosynthesis and metabolism p.1	54	0.00103104	0.00281388	0.561292	0.574722	1	CYP1A2
678	Membrane-bound ESR1: interaction with G-proteins signaling	54	0.00103104	0.00281388	0.00885476	0.0157207	4	MMP-9, ERK1/2, eNOS, MMP-2
679	Translation_Regulation of EIF4F activity	54	0.00103104	0.00281388	0.00885476	0.0157207	4	MEK3(MAP2K3), PI3K cat class IA, TGF-beta 1, ERK1/2
680	Cell adhesion_Role of CDK5 in cell adhesion	10	0.00106407	0.00289797	0.141264	0.180173	1	ErbB2
681	Development_FGF-family signaling	52	0.00108929	0.00251265	0.00108929	0.00251265	5	PI3K cat class IA, ERK1 (MAPK3), FGFR1, ERK2 (MAPK1), FGFR4
682	Development_WNT/Beta-catenin signaling in the cytoplasm	55	0.00113673	0.00302244	0.0502259	0.0729985	3	Casein kinase II, alpha chains, GSK3 alpha/beta, GSK3 beta
683	Cell cycle_Role of 14-3-3 proteins in cell cycle regulation	22	0.001139	0.00302244	0.284817	0.335667	1	ATR
684	LRRK2 and immune function in Parkinson's disease	22	0.001139	0.00302244	0.0042277	0.00828843	3	I-kB, NF-kB, TNF-alpha
685	Putative glucocorticoid- and LABA-mediated inhibition of pro-fibrotic signaling in airway fibroblasts/myofibroblasts	31	0.00115263	0.00264401	0.00115263	0.00264401	4	ACTA2, MMP-9, TGF-beta 1, ERK1/2
686	Inhibition of TGF-beta signaling in lung cancer	31	0.00115263	0.00264401	0.00115263	0.00264401	4	Caspase-3, PAI1, TGF-beta 1, c-Myc
687	Proinflammatory cytokine production by Th17 cells in asthma	53	0.00118824	0.00271066	0.00118824	0.00271066	5	NF-kB, TGF-beta 1, IL-1 beta, IL-6, TNF-alpha
688	L-Arginine metabolism	79	0.00122094	0.00278016	0.00122094	0.00278016	6	iNOS, KCRB, KCRM, eNOS, nNOS, KCRU
689	Cell cycle_Regulation of G1/S transition (part 1)	38	0.00125987	0.00331411	0.0194231	0.0312229	3	GSK3 beta, Ubiquitin, TGF-beta 1
690	Blood coagulation_GPVI-dependent platelet activation	54	0.00129369	0.00293503	0.00129369	0.00293503	5	Syk, Fyn, Lyn, PECAM1, PI3K cat class IA (p110-alpha)
691	Eosinophil granule protein release in asthma	54	0.00129369	0.00293503	0.00129369	0.00293503	5	ERK1/2, PKC, VEGFR-1, VEGF-A, TNF-alpha
692	Role of GITR in skin sensitization	15	0.00134992	0.00304591	0.00134992	0.00304591	3	IL-1 alpha, IL-1 beta, TNF-alpha
693	Development_EGFR signaling via PIP3	23	0.00135565	0.00352361	0.0466627	0.0681276	2	PI3K cat class IA, ErbB2
694	Transcription_Epigenetic regulation of gene expression	57	0.00137283	0.00355417	0.580967	0.592424	1	HDAC8
695	Regulation of degradation of deltaF508-CFTR in CF	39	0.00142006	0.00364046	0.1171	0.152488	2	Ubiquitin, HSP70
696	Role of metalloproteases and heparanase in progression of pancreatic cancer	33	0.00146418	0.00326808	0.00146418	0.00326808	4	ERK1 (MAPK3), MMP-9, VEGF-A, MMP-2
697	IGF family, invasion and metastasis in colorectal cancer	33	0.00146418	0.00326808	0.00146418	0.00326808	4	PI3K cat class IA, ERK1 (MAPK3), PAI1, PLAT (TPA)
698	Stem cells_SDF-1 axis in endothelial progenitor cell recruitment in healing myocardial infarction	33	0.00146418	0.00326808	0.00146418	0.00326808	4	ICAM1, ERK2 (MAPK1), eNOS, HIF1A
699	Development_EGFR signaling via small GTPases	33	0.00146418	0.00326808	0.00146418	0.00326808	4	PI3K cat class IA, ErbB2, ERK1/2, c-Myc
700	Stem cells_Role of PKR1 and ILK in cardiac progenitor cells	33	0.00146418	0.00326808	0.00146418	0.00326808	4	PI3K cat class IA, c-Kit, GSK3 beta, ERK1/2
701	Cell adhesion_Integrin inside-out signaling	58	0.00150406	0.00381845	0.00178564	0.00388768	5	ITGB2, ERK1 (MAPK3), ERK1/2, ERK2 (MAPK1), PIPKI gamma
702	Immune response_CCR5 signaling in macrophages and T lymphocytes	58	0.00150406	0.00381845	0.0113404	0.0194653	4	MEK3(MAP2K3), ERK1/2, Lck, PAK2
703	Impaired inhibitory action of lipoxins on neutrophil migration in CF	56	0.00152511	0.00339796	0.00152511	0.00339796	5	Alpha-actinin, ITGB2, PIP5KI, ICAM1, ERK1/2
704	Hedgehog signaling in breast cancer	24	0.00159949	0.00401404	0.00543492	0.0102816	3	MMP-9, VEGF-A, MMP-2
705	Development_HGF-dependent inhibition of TGF-beta-induced EMT	34	0.00164004	0.00360218	0.00164004	0.00360218	4	TGF-beta 1, ERK1/2, p90Rsk, HGF receptor (Met)
706	Mechanism of action of CCR4 antagonists in asthma and atopic dermatitis (Variant 1)	34	0.00164004	0.00360218	0.00164004	0.00360218	4	ITGB2, VCAM1, ICAM1, PIPKI gamma
707	CCR4-dependent immune cell chemotaxis in asthma and atopic dermatitis	34	0.00164004	0.00360218	0.00164004	0.00360218	4	ITGB2, VCAM1, ICAM1, PIPKI gamma
708	NK cells in allergic contact dermatitis	34	0.00164004	0.00360218	0.00164004	0.00360218	4	NF-kB, ICAM1, CCL2, TNF-alpha
709	Chemotaxis_CCR4-induced chemotaxis of immune cells	34	0.00164004	0.00360218	0.00164004	0.00360218	4	ITGB2, VCAM1, ICAM1, PIPKI gamma
710	Apoptosis and survival_Cytoplasmic/mitochondrial transport of proapoptotic proteins Bid, Bmf and Bim	34	0.00164004	0.00360218	0.00164004	0.00360218	4	Bcl-2, TNF-alpha, Bax, GLK(MAP4K3)
711	Oxidative stress_Activation of NADPH oxidase	59	0.00164463	0.00411944	0.0120249	0.020555	4	PI3K cat class IA, IRAK4, ERK1/2, PKC
712	Proinflammatory mediators release and arachidonic acid metabolites production in basophils in asthma	57	0.00165161	0.00360218	0.00165161	0.00360218	5	MEK3(MAP2K3), PI3K cat class IA, Syk, ERK1/2, Lyn
713	Possible pathway of TGF-beta 1-dependent inhibition of CFTR expression	41	0.00178477	0.00444496	0.023753	0.037408	3	MEK3(MAP2K3), TGF-beta 1, PI3K cat class IA (p110-alpha)
714	Cigarette smoke-induced oxidative stress and apoptosis in airway epithelial cells	60	0.00179497	0.00445342	0.0620823	0.0879081	3	Caspase-3, Bcl-2, Bax
715	Pro-oncogenic action of Androgen receptor in breast cancer	35	0.00183007	0.00393607	0.00183007	0.00393607	4	ErbB2, ERK1/2, SGK1, FASN
716	Role of adhesion of SCLC cells in tumor progression	35	0.00183007	0.00393607	0.00183007	0.00393607	4	VCAM1, ICAM1, MMP-2, P-selectin
717	Immune response_Th17 cell differentiation	35	0.00183007	0.00393607	0.00183007	0.00393607	4	NF-kB, TGF-beta 1, IL-1 beta, IL-6
718	Anti-apoptotic action of Gastrin in gastric cancer	35	0.00183007	0.00393607	0.00183007	0.00393607	4	Caspase-3, Bcl-2, ERK1/2, Bax
719	Immune response_Lipoxins and Resolvin E1 inhibitory action on neutrophil functions	35	0.00183007	0.00393607	0.00183007	0.00393607	4	I-kB, NF-kB, ERK1/2, NFKBIA
720	Cell cycle_ESR1 regulation of G1/S transition	35	0.00183007	0.00393607	0.00183007	0.00393607	4	Ubiquitin, ERK1/2, ERK2 (MAPK1), c-Myc
721	Apoptosis and survival_Apoptotic Activin A signaling	25	0.00187223	0.00461019	0.0542631	0.0779404	2	ERK1 (MAPK3), ERK2 (MAPK1)
722	Apoptosis and survival_Role of nuclear PI3K in NGF/ TrkA signaling	25	0.00187223	0.00461019	0.316806	0.366067	1	PI3K cat class IA
723	HSP70 and HSP40-dependent folding in Huntington's disease	25	0.00187223	0.00461019	0.00610824	0.0112802	3	HSPA1A, Ubiquitin, HSP70
724	Dual role of BMP signaling in gastric cancer	25	0.00187223	0.00461019	0.00610824	0.0112802	3	PI3K cat class IA, I-kB, RelA (p65 NF-kB subunit)
725	Reactive oxygen and nitrogen species production in eosinophils in asthma	59	0.00192748	0.00413841	0.00192748	0.00413841	5	PI3K cat class IA, iNOS, ITGB2, VCAM1, ICAM1
726	GLP-1 in inhibition of beta cell proliferation and function in type 2 diabetes	42	0.00199085	0.0048476	0.0253029	0.0396476	3	ERK1/2, Insulin, HXK4
727	Estrogen biosynthesis	42	0.00199085	0.0048476	0.472972	0.49869	1	CYP11B1
728	Immune response_IL-12-induced IFN-gamma production	36	0.00203483	0.00433887	0.00203483	0.00433887	4	MEK3(MAP2K3), I-kB, NF-kB, iNOS
729	A shift from oxidative to glycolytic muscle fiber phenotype in quadriceps muscles in COPD	60	0.00207738	0.00442201	0.00207738	0.00442201	5	NF-kB, Myoglobin, AMPK alpha subunit, ERK2 (MAPK1), TNF-alpha
730	Regulation of microRNAs in colorectal cancer	62	0.00212665	0.0051591	0.0671574	0.0941721	3	RelA (p65 NF-kB subunit), c-Myc, HGF receptor (Met)
731	Regulation of CFTR activity (normal and CF)	62	0.00212665	0.0051591	0.240714	0.291155	2	Casein kinase II, alpha chains, Syk
732	Cell cycle_Initiation of mitosis	26	0.00217557	0.00523897	0.327149	0.376267	1	c-Myc
733	Development_ACM2 and ACM4 activation of ERK	43	0.00221378	0.00527281	0.137364	0.175741	2	ERK1/2, Fyn
734	Nicotine signaling in dopaminergic neurons, Pt. 2 - axon terminal	43	0.00221378	0.00527281	0.137364	0.175741	2	PAI1, PLAT (TPA)
735	Immune response_iC3b-induced phagocytosis via alpha-M/beta-2 integrin	61	0.00223563	0.00474259	0.00223563	0.00474259	5	PI3K cat class IA, ITGB2, Syk, PIP5KI, PKC
736	Induction of mucin secretion in airway goblet cells by purinergic receptors	61	0.00223563	0.00474259	0.00223563	0.00474259	5	NF-kB, iNOS, HSP70, NFKBIA, TNF-alpha
737	Regulation of lipid metabolism_Insulin regulation of fatty acid metabolism	89	0.00225511	0.00475142	0.00225511	0.00475142	6	PI3K cat class IA, GSK3 beta, ERK1/2, HXK4, Insulin processed, FASN
738	Apoptosis and survival_CXCR3-B signaling	63	0.00230888	0.00547941	0.0150261	0.024797	4	Caspase-3, Bcl-2, ERK1/2, Bax
739	Stem cells_CD30 signaling in transformed embryonic stem cells	18	0.00234162	0.00491701	0.00234162	0.00491701	3	I-kB, NF-kB p50/p65, c-Myc
740	Apoptosis and survival_FAS signaling cascades	44	0.00245436	0.00578274	0.00427041	0.0083458	4	Caspase-3, Bcl-2, PAK2, Bax
741	Development_SDF-1 signaling in hematopoietic stem cell homing	38	0.00249082	0.00522147	0.00249082	0.00522147	4	PI3K cat class IA, MMP-9, ERK1/2, Lyn
742	Cell adhesion_Ephrin signaling	45	0.00271337	0.00634736	0.147767	0.187313	2	Ephrin-A receptors, Fyn
743	DKK1 signaling in multiple myeloma	19	0.00275001	0.00570696	0.00275001	0.00570696	3	GSK3 beta, RelA (p65 NF-kB subunit), IL-6
744	Schema: Initiation of T cell recruitment in allergic contact dermatitis	19	0.00275001	0.00570696	0.00275001	0.00570696	3	VCAM1, ICAM1, TNF-alpha
745	Ethanol/Acetaldehyde-dependent stimulation of MMP-9 expression in HCC	19	0.00275001	0.00570696	0.00275001	0.00570696	3	NF-kB, MMP-9, NFKBIA
746	CHDI_Correlations from Replication data_Cytoskeleton and adhesion module	64	0.00276306	0.00571494	0.00276306	0.00571494	5	Alpha-actinin, ITGB2, ICAM1, Fyn, ZAP70
747	Immune response_IFN-alpha/beta signaling via JAK/STAT	64	0.00276306	0.00571494	0.00276306	0.00571494	5	Bcl-2, PKR, CCL2, Bax, HIF1A
748	Possible influence of low doses of Arsenite on glucose uptake in muscle	28	0.00288071	0.00671481	0.00841722	0.0150299	3	PI3K cat class IA, Insulin processed, PKC-lambda/iota
749	Neurophysiological process_Receptor-mediated axon growth repulsion	46	0.00299163	0.00691187	0.153028	0.193388	2	Ephrin-A receptors, Fyn
750	Dual function of Treg cells in cancer development	46	0.00299163	0.00691187	0.0320337	0.0486582	3	CD45, TGF-beta 1, IL-6
751	Stem cells_FGF2-induced self-renewal of adult neural stem cells	40	0.00301252	0.00621019	0.00301252	0.00621019	4	PI3K cat class IA, FGFR1, ERK1/2, PKC
752	HBV mediates angiogenesis in HCC	20	0.00319965	0.00656326	0.00319965	0.00656326	3	ERK1/2, VEGF-A, HIF1A
753	Cell cycle_Role of SCF complex in cell cycle regulation	29	0.00328576	0.00749527	0.357255	0.402682	1	Ubiquitin
754	Immune response_Delta-type opioid receptor signaling in T-cells	29	0.00328576	0.00749527	0.0706387	0.0987192	2	ERK1 (MAPK3), ERK2 (MAPK1)
755	Regulation of lipid metabolism_Insulin signaling: generic cascades	47	0.00328991	0.00749527	0.00541795	0.0102816	4	PI3K cat class IA, GSK3 beta, ERK1/2, Insulin processed
756	Glucose-inhibited neurons of ventromedial and arcuate nuclei (rodent model)	41	0.00329938	0.00669041	0.00329938	0.00669041	4	AMPK alpha subunit, HXK4, nNOS, AMPK alpha 2 subunit
757	Signaling Transduction_Role of MIF as an intracellular mediator	41	0.00329938	0.00669041	0.00329938	0.00669041	4	MIF, RelA (p65 NF-kB subunit), IL-1 beta, Bax
758	Development_Muscle progenitor cell migration in hypaxial myogenesis	41	0.00329938	0.00669041	0.00329938	0.00669041	4	FGFR1, ERK1/2, FGFR4, HGF receptor (Met)
759	Regulation of beta-adrenergic receptors signaling in pancreatic cancer	41	0.00329938	0.00669041	0.00329938	0.00669041	4	GBR1, ERK1/2, VEGF-A, IL-6
760	Development_VEGF-family signaling	41	0.00329938	0.00669041	0.00329938	0.00669041	4	PI3K cat class IA, ERK1/2, VEGFR-1, VEGF-A
761	Immune response_TLR2-induced platelet activation	41	0.00329938	0.00669041	0.00329938	0.00669041	4	PI3K cat class IA, ERK1/2, IL-1 beta, P-selectin
762	Role of tumor-infiltrating B cells in anti-tumor immunity	91	0.00347551	0.00790436	0.751085	0.752298	1	NF-kB
763	Apoptosis and survival_Apoptotic TNF-family pathways	42	0.0036043	0.00724949	0.0036043	0.00724949	4	Caspase-3, Bcl-2, TNF-alpha, Bax
764	Transcription targets of Androgen receptor involved in Prostate Cancer	42	0.0036043	0.00724949	0.0036043	0.00724949	4	TGF-beta 1, VEGF-A, IL-6, c-Myc
765	Role of prenatal nicotine exposure in inhibition of pancreatic beta cells differentiation and function	21	0.00369182	0.00736583	0.00369182	0.00736583	3	Insulin, HXK4, Insulin processed
766	Probable BMP4-mediated induction of EMT in airway epithelium	21	0.00369182	0.00736583	0.00369182	0.00736583	3	MMP-9, MMP-2, Desmin
767	HCV-dependent transcription regulation leading to HCC	21	0.00369182	0.00736583	0.00369182	0.00736583	3	HSPA1A, HSP70, Bax
768	Prostaglandins and leukotrienes-mediated induction of expression of mucins in normal and asthmatic epithelium	43	0.0039278	0.00777417	0.0039278	0.00777417	4	NF-kB, ERK1/2, p90RSK2(RPS6KA3), NFKBIA
769	Role of platelets in the initiation of in-stent restenosis	43	0.0039278	0.00777417	0.0039278	0.00777417	4	ICAM1, TGF-beta 1, CCL2, P-selectin
770	Th2-cytokine-induced airway epithelium mucous metaplasia in COPD	70	0.00407934	0.00806125	0.00407934	0.00806125	5	NF-kB, iNOS, ERK1/2, NF-kB p65/p65, nNOS
771	Deregulation of canonical WNT signaling in major depressive disorder	31	0.00420879	0.00927466	0.0793541	0.109057	2	GSK3 beta, c-Myc
772	Linoleic acid metabolism	31	0.00420879	0.00927466	0.376577	0.420641	1	CYP1A2
773	Influence of low doses of Arsenite on glucose uptake in adipocytes	31	0.00420879	0.00927466	0.0111744	0.0192069	3	PI3K cat class IA, Insulin processed, PKC-lambda/iota
774	TLR and EGFR-induced inflammatory signaling in normal and asthmatic airway epithelium	22	0.0042277	0.00828843	0.0042277	0.00828843	3	NF-kB p50/p65, MMP-9, ERK1/2
775	Immune response_Oncostatin M signaling via JAK-Stat	22	0.0042277	0.00828843	0.0042277	0.00828843	3	ACTA2, VEGF-A, CCL2
776	Blood coagulation_Platelet microparticle generation	72	0.004522	0.00987302	0.023393	0.037029	4	Caspase-3, PKC, IL-1 beta, P-selectin
777	SCAP/SREBP Transcriptional Control of Cholesterol and FA Biosynthesis	45	0.00463264	0.00899705	0.00463264	0.00899705	4	GSK3 beta, Insulin processed, TNF-alpha, FASN
778	Development_EPO-induced MAPK pathway	45	0.00463264	0.00899705	0.00463264	0.00899705	4	c-Kit, Syk, ERK1/2, Lyn
779	Stem cells_Signaling pathways in embryonic hepatocyte maturation	51	0.00469919	0.0102245	0.17983	0.223392	2	PI3K cat class IA, HGF receptor (Met)
780	microRNA in Prostate Cancer	51	0.00469919	0.0102245	0.17983	0.223392	2	Bcl-2, c-Myc
781	Stem cells_Role of Ceramide 1-phosphate, Sphingosine 1-phosphate and Complement cascade in hematopoietic stem cell homing	32	0.00472983	0.0102245	0.0121957	0.0206478	3	MMP-9, VCAM1, ERK1/2
782	Stem cells_Aberrant Wnt signaling in medulloblastoma stem cells	23	0.00480839	0.00928027	0.00480839	0.00928027	3	Casein kinase II, alpha chains, GSK3 beta, c-Myc
783	Development_ERK5 in cell proliferation and neuronal survival	23	0.00480839	0.00928027	0.00480839	0.00928027	3	Lck, p90RSK2(RPS6KA3), PKC-lambda/iota
784	Apoptosis and survival_NO signaling in apoptosis	23	0.00480839	0.00928027	0.00480839	0.00928027	3	iNOS, nNOS, Bax
785	Glucagon-induced glucose upregulation in type 2 diabetes in liver	52	0.00510948	0.0110089	0.547668	0.564967	1	iNOS
786	Neurogenesis_NGF/ TrkA MAPK-mediated signaling	105	0.005126	0.00984731	0.005126	0.00984731	6	MEK3(MAP2K3), ERK1/2, SGK1, p90Rsk, PKC-lambda/iota, NF-kB1 (p50)
787	Apoptosis and survival_Regulation of Apoptosis by Mitochondrial Proteins	33	0.00529252	0.011237	0.0883838	0.1204	2	Bcl-2, Bax
788	Cell cycle_Spindle assembly and chromosome separation	33	0.00529252	0.011237	0.0132688	0.0222221	3	Aurora-B, Ubiquitin, Aurora-A
789	Apoptosis and survival_Granzyme B signaling	33	0.00529252	0.011237	0.0132688	0.0222221	3	Caspase-3, FGFR1, CD63
790	Aflatoxin B1-dependent induction of HCC	33	0.00529252	0.011237	0.0883838	0.1204	2	CYP1A2, TNF-alpha
791	Development_Activation of astroglial cells proliferation by ACM3	33	0.00529252	0.011237	0.395322	0.436861	1	PI3K cat class IA
792	LRRK2 in neurons in Parkinson's disease	33	0.00529252	0.011237	0.0132688	0.0222221	3	GSK3 beta, Ubiquitin, ERK1/2
793	Immune response_Fc gamma R-mediated phagocytosis in macrophages	47	0.00541795	0.0102816	0.00541795	0.0102816	4	PI3K cat class IA, Syk, PIP5KI, Lyn
794	Mechanisms of deltaF508 CFTR activation by S-nitrosoglutathione	47	0.00541795	0.0102816	0.00541795	0.0102816	4	iNOS, HSP70, eNOS, nNOS
795	Inhibition of remyelination in multiple sclerosis: role of cell-cell and ECM-cell interactions	47	0.00541795	0.0102816	0.00541795	0.0102816	4	MMP-9, Connexin 43, PKC, Fyn
796	Neurophysiological process_Circadian rhythm	47	0.00541795	0.0102816	0.00541795	0.0102816	4	LDHA, ERK1/2, p90Rsk, nNOS
797	Translation_Translation regulation by Alpha-1 adrenergic receptors	53	0.00554453	0.0116774	0.554531	0.569209	1	ERK2 (MAPK1)
798	Common mechanisms of Th17 cell migration	48	0.005842	0.0109847	0.005842	0.0109847	4	VCAM1, ICAM1, CCL2, P-selectin
799	Immune response_NF-AT signaling and leukocyte interactions	48	0.005842	0.0109847	0.005842	0.0109847	4	NF-kB, Lck, ZAP70, NF-AT
800	Bacterial infections in CF airways	48	0.005842	0.0109847	0.005842	0.0109847	4	NF-kB, iNOS, TLR4, TNF-alpha
801	Cell adhesion_Integrin-mediated cell adhesion and migration	48	0.005842	0.0109847	0.005842	0.0109847	4	Alpha-actinin, ERK1/2, ERK2 (MAPK1), PIPKI gamma
802	G-protein signaling_RhoA regulation pathway	34	0.0058983	0.0123234	0.0930081	0.12587	2	Ephrin-A receptors, Fyn
803	Oxidative stress_ROS-mediated activation of MAPK via inhibition of phosphatases	34	0.0058983	0.0123234	0.0143942	0.0238176	3	MEK3(MAP2K3), ERK1/2, PDGF-R-beta
804	Immune responses in asthma (schema)	8	0.0059868	0.01124	0.0059868	0.01124	2	IL-1 beta, TNF-alpha
805	Role of Nicotine-induced Leptin resistance in hypothalamus in development of obesity	25	0.00610824	0.0112802	0.00610824	0.0112802	3	ERK1/2, AMPK alpha subunit, Leptin
806	Immune response_LPS-induced platelet activation	25	0.00610824	0.0112802	0.00610824	0.0112802	3	TLR4, IL-1 beta, P-selectin
807	Immune response_IL-2 signaling via JAK/ STAT	25	0.00610824	0.0112802	0.00610824	0.0112802	3	Syk, Bcl-2, c-Myc
808	Transcription_Transcription regulation of aminoacid metabolism	25	0.00610824	0.0112802	0.00610824	0.0112802	3	ERK1/2, PKC, c-Myc
809	HBV-dependent transcription regulation leading to HCC	25	0.00610824	0.0112802	0.00610824	0.0112802	3	TGF-beta 1, MMP-2, FASN
810	G-protein signaling_K-RAS regulation pathway	25	0.00610824	0.0112802	0.00610824	0.0112802	3	Lck, PI3K cat class IA (p110-alpha), PKC-theta
811	Breakdown of CD4+ T cell peripheral tolerance in type 1 diabetes mellitus	49	0.00628761	0.0115257	0.00628761	0.0115257	4	NF-kB, Lck, ZAP70, NF-AT
812	Cytoskeleton remodeling_Integrin outside-in signaling	49	0.00628761	0.0115257	0.00628761	0.0115257	4	Alpha-actinin, GSK3 beta, ERK1/2, PIPKI gamma
813	Neurophysiological process_HTR2A signaling in the nervous system	49	0.00628761	0.0115257	0.00628761	0.0115257	4	iNOS, SFK, ERK1/2, PKC
814	Role of inflammasome in macrophages, adipocytes and pancreatic beta cells in type 2 diabetes	18	0.00636907	0.0131393	0.0296348	0.0453475	2	NF-kB, IL-1 beta
815	Transcription_Assembly of RNA Polymerase II preinitiation complex on TATA-less promoters	18	0.00636907	0.0131393	0.239836	0.290661	1	AMH
816	Androgen signaling in HCC	18	0.00636907	0.0131393	0.0296348	0.0453475	2	TGF-beta 1, HGF receptor (Met)
817	Chemotaxis_CCL2-induced chemotaxis	55	0.00649192	0.0133623	0.00943898	0.0165918	4	PI3K cat class IA, ERK1/2, CCL2, Lyn
818	Cell adhesion_Alpha-4 integrins in cell migration and adhesion	35	0.00654856	0.0133623	0.0977012	0.131078	2	PI3K cat class IA, VCAM1
819	Development_EDNRB signaling	50	0.00675524	0.0123465	0.00675524	0.0123465	4	Endothelin-1, ERK1/2, p90RSK2(RPS6KA3), eNOS
820	Neurophysiological process_Dopamine D2 receptor transactivation of PDGFR in CNS	26	0.0068292	0.0124085	0.0068292	0.0124085	3	PDGF receptor, PKC, PDGF-R-beta
821	CD8+ Tc1 cells in allergic contact dermatitis	26	0.0068292	0.0124085	0.0068292	0.0124085	3	Caspase-3, IL-1 beta, TNF-alpha
822	Development_Keratinocyte differentiation	56	0.00700579	0.0141848	0.0525001	0.0757589	3	MEK3(MAP2K3), TGF-beta 1, ERK1/2
823	Regulation of Beta-catenin activity in colorectal cancer	56	0.00700579	0.0141848	0.0525001	0.0757589	3	PI3K cat class IA, GSK3 beta, ERK1/2
824	G-protein signaling_G-Protein alpha-s signaling cascades	36	0.00724463	0.0146007	0.10246	0.136138	2	GSK3 beta, ERK1/2
825	HCV-mediated liver damage and predisposition to HCC progression via p53	19	0.0074442	0.014934	0.0327977	0.0496972	2	ERK1/2, Bax
826	Regulation of lipid metabolism_Regulation of fatty acid synthase activity in hepatocytes	19	0.0074442	0.014934	0.251338	0.301947	1	FASN
827	Desensitization of Beta-2 adrenergic receptor signaling and reduction of relaxation	27	0.00759862	0.0137663	0.00759862	0.0137663	3	ERK1/2, IL-1 beta, p90Rsk
828	DNA damage_DNA-damage-induced responses	9	0.00762119	0.013787	0.00762119	0.013787	2	c-Abl, ATR
829	Development_Negative regulation of WNT/Beta-catenin signaling at the receptor level	37	0.0079878	0.0158786	0.431146	0.466887	1	GSK3 alpha/beta
830	G-protein signaling_Regulation of p38 and JNK signaling mediated by G-proteins	37	0.0079878	0.0158786	0.431146	0.466887	1	MEK3(MAP2K3)
831	A shift in alveolar macrophage phenotype in COPD	37	0.0079878	0.0158786	0.107281	0.141634	2	iNOS, MMP-2
832	Development_Regulation of cytoskeleton proteins in oligodendrocyte differentiation and myelination	58	0.00811754	0.0160877	0.218372	0.268052	2	PDGF-R-alpha, Fyn
833	Impaired inhibition of Th17 cell differentiation by IFN-beta in multiple sclerosis	28	0.00841722	0.0150299	0.00841722	0.0150299	3	TGF-beta 1, IL-1 beta, IL-6
834	Immune response_Innate immune response to RNA viral infection	28	0.00841722	0.0150299	0.00841722	0.0150299	3	I-kB, NF-kB, IKK-gamma
835	Putative pathways of activation of classical complement system in major depressive disorder	28	0.00841722	0.0150299	0.00841722	0.0150299	3	IL-1 beta, IL-6, TNF-alpha
836	Signal transduction_Cyclic AMP signaling	38	0.00877932	0.0171912	0.112162	0.146674	2	GSK3 alpha/beta, PKC
837	IgE-dependent production of pro-inflammatory mediators by neutrophils in asthma	38	0.00877932	0.0171912	0.112162	0.146674	2	NF-kB, ERK1/2
838	Development_FGFR signaling pathway	54	0.00885476	0.0157207	0.00885476	0.0157207	4	PI3K cat class IA, FGFR1, Ubiquitin, ERK1/2
839	Neurophysiological process_Dynein-dynactin motor complex in axonal transport in neurons	54	0.00885476	0.0157207	0.00885476	0.0157207	4	Ubiquitin, TrkB, ERK1/2, TrkC
840	Stem cells_Role of Neuregulin 1 and Thymosin beta-4 in myocardium regeneration after infarction	29	0.00928566	0.0163919	0.00928566	0.0163919	3	PI3K cat class IA, ErbB2, Endothelin-1
841	Adiponectin in pathogenesis of type 2 diabetes	29	0.00928566	0.0163919	0.00928566	0.0163919	3	AMPK alpha subunit, Insulin processed, FASN
842	Oxidative stress_Role of ASK1 under oxidative stress	55	0.00943898	0.0165918	0.00943898	0.0165918	4	c-Abl, MEK3(MAP2K3), DYRK1a, PRKD1
843	Immune response_Differentiation and clonal expansion of CD8+ T cells	39	0.00962038	0.0186984	0.1171	0.152488	2	NF-kB, ICAM1
844	Inhibition of tumor suppressive pathways in pancreatic cancer	21	0.00989889	0.0191828	0.273826	0.325808	1	Bax
845	Role of histone modificators in progression of multiple myeloma	30	0.0102045	0.0176869	0.0102045	0.0176869	3	Caspase-3, HDAC8, IL-6
846	Cell adhesion_Gap junctions	30	0.0102045	0.0176869	0.0102045	0.0176869	3	Connexin 43, PKC, Actin
847	Retinoic acid maintains mucocilliary differentiation and mucins expression in normal and asthmatic airway epithelium	30	0.0102045	0.0176869	0.0102045	0.0176869	3	ERK1/2, p90RSK2(RPS6KA3), TNF-alpha
848	Development_G-CSF-induced myeloid differentiation	30	0.0102045	0.0176869	0.0102045	0.0176869	3	ITGB2, ERK1/2, c-Myc
849	Transport_Aldosterone-mediated regulation of ENaC sodium transport	30	0.0102045	0.0176869	0.0102045	0.0176869	3	SGK1, ERK2 (MAPK1), PI3K cat class IA (p110-alpha)
850	Putative role of Tregs in COPD	30	0.0102045	0.0176869	0.0102045	0.0176869	3	CD45, ERK1/2, ZAP70
851	Stem cells_H3K27 demethylases in differentiation of stem cells	40	0.0105121	0.0202513	0.456622	0.484745	1	RelA (p65 NF-kB subunit)
852	NETosis in SLE	31	0.0111744	0.0192069	0.0111744	0.0192069	3	ERK1/2, PKC, IL-1 beta
853	Stem cells_FGF and BMP signaling in early embryonic hepatogenesis	31	0.0111744	0.0192069	0.0111744	0.0192069	3	FGFR1, ERK1/2, FGFR4
854	Mechanism of Pioglitazone/Glimepiride and Rosiglitazone/Glimepiride cooperative action in Diabetes mellitus, Type 2	11	0.0114147	0.0195659	0.0114147	0.0195659	2	Proinsulin, Insulin processed
855	Transcription_PPAR Pathway	63	0.0114203	0.0215926	0.0150261	0.024797	4	MEK3(MAP2K3), PI3K cat class IA, PDGF receptor, ERK1/2
856	Immune response_IL-4-induced regulators of cell growth, survival, differentiation and metabolism	63	0.0114203	0.0215926	0.0697639	0.0977167	3	Bcl-2, c-Myc, Bax
857	Role of Bregs in attenuation of T and NK cells mediated anti-tumor immune responses	41	0.0114556	0.0215926	0.127135	0.164033	2	TGF-beta 1, Lck
858	Development_Transcription regulation of granulocyte development	32	0.0121957	0.0206478	0.0121957	0.0206478	3	CD45, PKC, c-Myc
859	Immunological synapse between dendritic and CD8+ T cells in allergic contact dermatitis	32	0.0121957	0.0206478	0.0121957	0.0206478	3	NF-kB, ICAM1, Lck
860	Signal transduction_ERK1/2 signaling pathway	32	0.0121957	0.0206478	0.0121957	0.0206478	3	ERK1 (MAPK3), ERK1/2, ERK2 (MAPK1)
861	Development_Thrombopoietin signaling via JAK-STAT pathway	23	0.012771	0.0237305	0.0466627	0.0681276	2	Pim-1, Pim-2
862	Dysregulation of germinal center response in SLE	65	0.0129651	0.0240229	0.0166886	0.0273949	4	NF-kB, NF-kB p50/p65, VCAM1, ICAM1
863	G-protein signaling_Regulation of CDC42 activity	33	0.0132688	0.0222221	0.0132688	0.0222221	3	Caspase-3, FGFR1, Fyn
864	Signal transduction_mTORC1 downstream signaling	61	0.0134723	0.0225325	0.0134723	0.0225325	4	GSK3 beta, SGK1, VEGF-A, HIF1A
865	Development_EPO-induced PI3K/AKT pathway and Ca(2+) influx	43	0.013502	0.0248421	0.026906	0.0415304	3	PI3K cat class IA, Syk, Lyn
866	Development_WNT/Beta-catenin signaling pathway. Signalosome	43	0.013502	0.0248421	0.026906	0.0415304	3	GSK3 alpha/beta, GSK3 beta, PIP5KI
867	Role of epigenetic alterations in survival and migration of SCLC cells	43	0.013502	0.0248421	0.026906	0.0415304	3	Bcl-2, HGF receptor (Met), Bax
868	Development_Schema: Embryonal myogenesis	12	0.0135627	0.0226227	0.0135627	0.0226227	2	FGFR1, HGF receptor (Met)
869	Dual role of p53 in transcription deregulation in Huntington's Disease	12	0.0135627	0.0226227	0.0135627	0.0226227	2	HSPA1A, Bax
870	Immune response_T regulatory cell-mediated modulation of antigen-presenting cell functions	66	0.0137879	0.0253326	0.0175613	0.0286381	4	NF-kB, Connexin 43, ICAM1, TNF-alpha
871	Renin-Angiotensin-Aldosterone System	62	0.0142357	0.0236817	0.0142357	0.0236817	4	MEK3(MAP2K3), CYP11B2, ERK1/2, PRKD1
872	CFTR folding and maturation (normal and CF)	24	0.0143669	0.0263226	0.306304	0.356588	1	HSP70
873	Apoptosis and survival_NO signaling in survival	24	0.0143669	0.0263226	0.0504107	0.0729985	2	eNOS, nNOS
874	G-protein signaling_G-Protein alpha-q signaling cascades	34	0.0143942	0.0238176	0.0143942	0.0238176	3	PI3K cat class IA, I-kB, NF-kB
875	Proliferative action of Gastrin in pancreatic cancer	44	0.0146067	0.0265761	0.142545	0.181248	2	PI3K cat class IA, ERK1/2
876	Arachidonic acid metabolites production in eosinophils in asthma	44	0.0146067	0.0265761	0.142545	0.181248	2	ICAM1, PKC
877	Inhibition of remyelination in multiple sclerosis: regulation of cytoskeleton proteins	44	0.0146067	0.0265761	0.0285623	0.043923	3	TGF-beta, Fyn, TNF-alpha
878	Mechanisms of CAM-DR in multiple myeloma	35	0.0155721	0.0256299	0.0155721	0.0256299	3	VCAM1, ICAM1, HSP70
879	Glucose-excited neurons of arcuate nucleus in obesity (rodent model)	35	0.0155721	0.0256299	0.0155721	0.0256299	3	AMPK alpha subunit, HXK4, AMPK alpha 2 subunit
880	Differentiation of Th2 cells in asthma	45	0.0157671	0.0284894	0.0302716	0.0461511	3	PI3K cat class IA, CCL2, NFKBIA
881	Defective macrophage-mediated bacterial phagocytosis in COPD	25	0.0160707	0.0287998	0.316806	0.366067	1	PI3K cat class IA (p110-alpha)
882	Inhibition of oligodendrocyte precursor cells differentiation by Wnt signaling in multiple sclerosis	25	0.0160707	0.0287998	0.316806	0.366067	1	GSK3 beta
883	Role of microRNAs in cell proliferation in colorectal cancer	69	0.0164654	0.0294668	0.0863323	0.118385	3	MIF, c-Myc, HGF receptor (Met)
884	Immune response_IL-6-induced acute-phase response in hepatocytes	36	0.0168027	0.0274371	0.0168027	0.0274371	3	CRP, PAI1, IL-6
885	Immune response_IL-22 signaling pathway	36	0.0168027	0.0274371	0.0168027	0.0274371	3	Bcl-2, ERK1/2, c-Myc
886	WNT signaling in gastric cancer	36	0.0168027	0.0274371	0.0168027	0.0274371	3	GSK3 beta, Ubiquitin, TNF-alpha
887	Development_G-protein-mediated regulation of MAPK-ERK signaling	46	0.0169838	0.0303116	0.153028	0.193388	2	ERK1 (MAPK3), ERK2 (MAPK1)
888	Signal transduction_HTR2A-dependent arachidonic acid production	26	0.0178831	0.0317008	0.327149	0.376267	1	ERK1/2
889	Gamma-secretase regulation of osteogenesis	37	0.0180864	0.0293785	0.0180864	0.0293785	3	NF-kB, M-CSF receptor, RelA (p65 NF-kB subunit)
890	Role of red blood cell adhesion to endothelium in vaso-occlusion in Sickle cell disease	37	0.0180864	0.0293785	0.0180864	0.0293785	3	VCAM1, ERK1/2, P-selectin
891	Development_Early embryonal hypaxial myogenesis	37	0.0180864	0.0293785	0.0180864	0.0293785	3	GSK3 beta, PKC, FGFR4
892	Development_Beta-adrenergic receptor-induced regulation of ERK	47	0.0182576	0.032104	0.511738	0.532774	1	ERK1/2
893	Chemotaxis_Lipoxin inhibitory action on Formyl-Met-Leu-Phe-induced neutrophil chemotaxis	47	0.0182576	0.032104	0.0338484	0.0509162	3	MEK3(MAP2K3), ICAM1, Lyn
894	Immune response_PGE2 common pathways	47	0.0182576	0.032104	0.158325	0.199879	2	ERK1 (MAPK3), ERK2 (MAPK1)
895	Transport_Alpha-2 adrenergic receptor regulation of ion channels	47	0.0182576	0.032104	0.511738	0.532774	1	PKC
896	Stem cells_TNF-alpha, IL-1 alpha and WNT5A-dependent regulation of osteogenesis and adipogenesis in mesenchymal stem cells	47	0.0182576	0.032104	0.0338484	0.0509162	3	IL-1 alpha, NFKBIA, TNF-alpha
897	Immune response _Sialic-acid receptors (Siglecs) signaling	14	0.018334	0.0297031	0.018334	0.0297031	2	CD45, Lyn
898	Regulation of lipid metabolism_Alpha-1 adrenergic receptors signaling via arachidonic acid	71	0.0184303	0.0323641	0.661789	0.66934	1	ERK1/2
899	Activation of Ca2+-dependent neuronal cell death in Huntington's disease	38	0.0194231	0.0312229	0.0194231	0.0312229	3	Caspase-3, nNOS, Bax
900	Development_Gastrin in differentiation of the gastric mucosa	38	0.0194231	0.0312229	0.0194231	0.0312229	3	ERK1/2, PKC, PKC-theta
901	WNT signaling in invasive-type melanoma cells	38	0.0194231	0.0312229	0.0194231	0.0312229	3	TGF-beta 1, PKC, MMP-2
902	WNT signaling in proliferative-type melanoma cells	38	0.0194231	0.0312229	0.0194231	0.0312229	3	GSK3 beta, ERK1/2, c-Myc
903	Oxidative stress_Role of IL-8 signaling pathway in respiratory burst	48	0.0195893	0.0343075	0.519144	0.539579	1	ERK1/2
904	Complement pathway disruption in thrombotic microangiopathy	39	0.0208131	0.0332421	0.0208131	0.0332421	3	PKC, IL-1 beta, P-selectin
905	Atorvastatin in treatment of type 2 diabetes and metabolic syndrome X	39	0.0208131	0.0332421	0.0208131	0.0332421	3	ERK1 (MAPK3), ERK2 (MAPK1), SOD3 (EC-SOD)
906	HIV-1 signaling via CCR5 in macrophages and T lymphocytes	39	0.0208131	0.0332421	0.0208131	0.0332421	3	MEK3(MAP2K3), CCL2, TNF-alpha
907	Apoptosis and survival_DNA-damage-induced apoptosis	15	0.020947	0.0334129	0.020947	0.0334129	2	c-Abl, ATR
908	Transcription_N-CoR/ SMRT complex-mediated epigenetic gene silencing	49	0.0209795	0.0364015	0.169018	0.21273	2	NF-kB, Ubiquitin
909	Development_Regulation of CDK5 in CNS	28	0.0218355	0.0374895	0.0664075	0.0933314	2	TrkB, ERK1/2
910	Development_Mu-type opioid receptor regulation of proliferation	28	0.0218355	0.0374895	0.347372	0.394769	1	ERK1/2
911	Glucose-excited neurons of arcuate nucleus (rodent model)	40	0.0222564	0.0353199	0.0222564	0.0353199	3	AMPK alpha subunit, HXK4, AMPK alpha 2 subunit
912	Stem cells_Response to hypoxia in glioblastoma stem cells	40	0.0222564	0.0353199	0.0222564	0.0353199	3	Ubiquitin, VEGF-A, HIF1A
913	Stem cells_FGF signaling in pancreatic and hepatic differentiation of embryonic stem cells	40	0.0222564	0.0353199	0.0222564	0.0353199	3	FGFR1, ERK1/2, FGFR4
914	Cell adhesion_IL-8 family-dependent cell migration and adhesion	40	0.0222564	0.0353199	0.0222564	0.0353199	3	ITGB2, ICAM1, ERK1/2
915	Immune response_Function of MEF2 in T lymphocytes	50	0.0224288	0.0383073	0.17441	0.218189	2	Lck, ZAP70
916	Immune response_IL-13 signaling via PI3K-ERK pathway	50	0.0224288	0.0383073	0.17441	0.218189	2	ERK1/2, c-Myc
917	Angiotensin II Signaling in Cardiac Hypertrophy	72	0.023393	0.037029	0.023393	0.037029	4	NF-kB, NF-AT3(NFATC4), ERK1/2, PRKD1
918	Development_Oxytocin receptor signaling	41	0.023753	0.037408	0.023753	0.037408	3	iNOS, eNOS, nNOS
919	Regulation of metabolism_Bile acids regulation of glucose and lipid metabolism via FXR	41	0.023753	0.037408	0.023753	0.037408	3	GSK3 alpha/beta, Insulin processed, FASN
920	Stem cells_Inhibition of Hedgehog signaling in medulloblastoma stem cells	41	0.023753	0.037408	0.023753	0.037408	3	FGFR1, ERK1/2, FGFR4
921	Signal transduction_PKA signaling	51	0.0239377	0.040527	0.0416282	0.061795	3	Troponin I, cardiac, GSK3 alpha/beta, NFKBIA
922	Putative pathways of n-3 and n-6 fatty acids in obesity and type 2 diabetes	51	0.0239377	0.040527	0.17983	0.223392	2	PI3K cat class IA (p110-alpha), FASN
923	Cigarette smoke-mediated regulation of NRF2-antioxidant pathway in airway epithelial cells	29	0.0239759	0.040527	0.357255	0.402682	1	Catalase
924	Development_SSTR1 in regulation of cell proliferation and migration	29	0.0239759	0.040527	0.357255	0.402682	1	ERK1/2
925	Transport_ACM3 signaling in salivary glands	42	0.0253029	0.0396476	0.0253029	0.0396476	3	PKC, eNOS, nNOS
926	Development_TGF-beta family mediated differentiation of embryonic stem cells	42	0.0253029	0.0396476	0.0253029	0.0396476	3	TGF-beta 1, CD34, PECAM1
927	Oxidative stress_Activation of NOX1, NOX5, DUOX1 and DUOX2 NADPH Oxidases	42	0.0253029	0.0396476	0.0253029	0.0396476	3	c-Abl, PKC, ERK2 (MAPK1)
928	Stem cells_mGluR3 signaling in glioblastoma stem cells	52	0.0255067	0.0428381	0.547668	0.564967	1	ERK1/2
929	L-Phenylalanine metabolism	74	0.0255685	0.0399629	0.0255685	0.0399629	4	MIF, AATC, GLYAT, AATM
930	Th2-cytokines-induced expression of mucins in asthma	43	0.026906	0.0415304	0.026906	0.0415304	3	ERK1/2, IL-6, HIF1A
931	Regulation of proinflammatory cytokine production by Th2 cells in asthma	43	0.026906	0.0415304	0.026906	0.0415304	3	IRAK4, NF-kB p50/p65, TNF-alpha
932	Regulation of metabolism_Role of Adiponectin in regulation of metabolism	43	0.026906	0.0415304	0.026906	0.0415304	3	AMPK alpha subunit, Insulin processed, PI3K cat class IA (p110-alpha)
933	Neurophysiological process_HTR1A receptor signaling in neuronal cells	43	0.026906	0.0415304	0.026906	0.0415304	3	ERK1 (MAPK3), GluR1, ERK2 (MAPK1)
934	TLRs-mediated IFN-alpha production by plasmacytoid dendritic cells in SLE	53	0.0271362	0.0453424	0.0458263	0.0672228	3	IRAK4, Pim-1, IKK-gamma
935	Role of mevalonate pathway in multiple myeloma	44	0.0285623	0.043923	0.0285623	0.043923	3	PI3K cat class IA, ERK1/2, PI3K cat class IA (p110-alpha)
936	Development_Activation of ERK by Kappa-type opioid receptor	31	0.0285846	0.0473998	0.0793541	0.109057	2	ERK1 (MAPK3), ERK2 (MAPK1)
937	Role of inhibition of WNT signaling in the progression of lung cancer	31	0.0285846	0.0473998	0.0793541	0.109057	2	GSK3 beta, MMP-9
938	Stem cells_Dopamine-induced transactivation of EGFR in SVZ neural stem cells	31	0.0285846	0.0473998	0.0793541	0.109057	2	ERK1/2, PKC
939	Role of activation of WNT signaling in the progression of lung cancer	77	0.0290533	0.0445675	0.0290533	0.0445675	4	iNOS, GSK3 beta, VEGF-A, c-Myc
940	Immune response _CCR3 signaling in eosinophils	77	0.0290533	0.0445675	0.0290533	0.0445675	4	iNOS, ERK2 (MAPK1), FGR, CCL13
941	Immune response_PGE2 signaling in immune response	45	0.0302716	0.0461511	0.0302716	0.0461511	3	ERK1 (MAPK3), ERK2 (MAPK1), TNF-alpha
942	Fructose metabolism	81	0.0305564	0.0503239	0.709833	0.71386	1	HXK4
943	Immune response_BAFF-induced non-canonical NF-kB signaling	32	0.0310523	0.0510396	0.386021	0.429643	1	Ubiquitin
944	Immune response_ETV3 affect on CSF1-promoted macrophage differentiation	19	0.0327977	0.0496972	0.0327977	0.0496972	2	M-CSF receptor, c-Myc
945	Development_Self-renewal and pluripotency maintenance of human embryonic stem cells	33	0.0336283	0.054929	0.395322	0.436861	1	c-Myc
946	Signal transduction_JNK pathway	47	0.0338484	0.0509162	0.0338484	0.0509162	3	GCK(MAP4K2), TNF-alpha, GLK(MAP4K3)
947	Stem cells_Schema: FGF signaling in embryonic stem cell self-renewal and differentiation	47	0.0338484	0.0509162	0.0338484	0.0509162	3	TGF-beta 1, CD34, VEGF-A
948	wtCFTR and deltaF508 traffic / Membrane expression (normal and CF)	47	0.0338484	0.0509162	0.0338484	0.0509162	3	PIP5KI, Ubiquitin, HGF receptor (Met)
949	CCR7 signaling pathways in dendritic cells in allergic contact dermatitis	57	0.0342668	0.0558327	0.212815	0.261747	2	ICAM1, ERK1/2
950	Immune response_IL-11 signaling via JAK/STAT	34	0.0363118	0.0582948	0.0930081	0.12587	2	Bcl-2, Pim-1
951	Stem cells_Histone acetylation in embryonic stem cells	34	0.0363118	0.0582948	0.404483	0.445793	1	c-Myc
952	G-protein signaling_G-Protein beta/gamma signaling cascades	34	0.0363118	0.0582948	0.404483	0.445793	1	ERK1/2
953	Role of osteoblasts in bone lesions formation in multiple myeloma	35	0.0391022	0.0621648	0.0977012	0.131078	2	VCAM1, TNF-alpha
954	Development_Regulation of telomere length and cellular immortalization	35	0.0391022	0.0621648	0.0977012	0.131078	2	PI3K cat class IA, c-Myc
955	Action of lithium on synaptic transmission and autophagy	35	0.0391022	0.0621648	0.413506	0.452523	1	GSK3 beta
956	Development_Beta-catenin destruction complex signaling	21	0.0394964	0.058771	0.0394964	0.058771	2	GSK3 alpha/beta, Ubiquitin
957	Development_Role of G-CSF in hematopoietic stem cell mobilization	21	0.0394964	0.058771	0.0394964	0.058771	2	MMP-9, ICAM1
958	Signal transduction_CXCR4 signaling via second messengers and JAK/STAT	50	0.0396057	0.0588631	0.0396057	0.0588631	3	Bcl-2, Ubiquitin, Bax
959	Oxidative stress_Role of Sirtuin1 and PGC1-alpha in activation of antioxidant defense system	60	0.040264	0.063857	0.0620823	0.0879081	3	Catalase, GPX1, AMPK alpha subunit
960	Cell cycle_The metaphase checkpoint	36	0.0419983	0.0664466	0.10246	0.136138	2	Aurora-B, Aurora-A
961	Transition of Monoclonal gammopathy of undetermined significance to active multiple myeloma (schema)	22	0.0430232	0.0634861	0.0430232	0.0634861	2	MMP-9, MMP-2
962	Expression targets of Tissue factor signaling in cancer	22	0.0430232	0.0634861	0.0430232	0.0634861	2	PAI1, CTGF
963	Translation_Role of Retinoic acid signaling in the initiation of translation	22	0.0430232	0.0634861	0.0430232	0.0634861	2	GluR1, ERK1/2
964	Immune response_IL-15 signaling via JAK-STAT cascade	22	0.0430232	0.0634861	0.0430232	0.0634861	2	Syk, Bcl-2
965	Immune response_The effect of IDO1 on T cell metabolism	89	0.0431941	0.0681737	0.390261	0.433973	2	LDHA, GCN2
966	Impaired NO signaling in CF airways	52	0.0437019	0.064411	0.0437019	0.064411	3	iNOS, eNOS, nNOS
967	Development_Negative regulation of WNT/Beta-catenin signaling in the nucleus	89	0.0456978	0.0672228	0.0456978	0.0672228	4	NF-AT3(NFATC4), GSK3 beta, VEGF-A, eNOS
968	Role of IL-17-producing T cells in allergic contact dermatitis	23	0.0466627	0.0681276	0.0466627	0.0681276	2	ICAM1, IL-6
969	Galactose metabolism	63	0.0468206	0.0732795	0.617722	0.627327	1	HXK4
970	G-protein signaling_G-Protein alpha-12 signaling pathway	38	0.0481038	0.074752	0.112162	0.146674	2	PI3K cat class IA, ERK1/2
971	Cortisol biosynthesis from Cholesterol	38	0.0481038	0.074752	0.112162	0.146674	2	CYP11B2, CYP11B1
972	Immune response_T regulatory cell-mediated modulation of effector T cell and NK cell functions	55	0.0502259	0.0729985	0.0502259	0.0729985	3	Connexin 43, TGF-beta 1, GCN2
973	Retinoic acid regulation of oligodendrocyte differentiation in multiple sclerosis	24	0.0504107	0.0729985	0.0504107	0.0729985	2	PDGF-R-alpha, TNF-alpha
974	G-protein signaling_M-RAS regulation pathway	24	0.0504107	0.0729985	0.0504107	0.0729985	2	ERK1/2, Lck
975	Muscle contraction_Regulation of eNOS activity in cardiomyocytes	56	0.0525001	0.0757589	0.0525001	0.0757589	3	Troponin I, cardiac, Troponin T, cardiac, eNOS
976	Generation of cytotoxic CD8+ T cells in COPD	25	0.0542631	0.0779404	0.0542631	0.0779404	2	NF-kB, ICAM1
977	G-protein signaling_TC21 regulation pathway	25	0.0542631	0.0779404	0.0542631	0.0779404	2	ERK1/2, Lck
978	Inhibition of TGF-beta signaling in gastric cancer	25	0.0542631	0.0779404	0.0542631	0.0779404	2	Ubiquitin, TGF-beta 1
979	WNT signaling in HCC	40	0.0546187	0.0833922	0.122092	0.157994	2	GSK3 beta, c-Myc
980	Development_Role of Activin A in cell differentiation and proliferation	40	0.0546187	0.0833922	0.456622	0.484745	1	c-Myc
981	Immune response_Th1 and Th2 cell differentiation	40	0.0546187	0.0833922	0.456622	0.484745	1	NF-kB
982	Neurophysiological process_Netrin-1 in regulation of axon guidance	40	0.0546187	0.0833922	0.456622	0.484745	1	Fyn
983	Role of glycosphingolipids in inhibition of Insulin signaling	40	0.0546187	0.0833922	0.122092	0.157994	2	Insulin processed, PI3K cat class IA (p110-alpha)
984	Th2-cytokines-induced mucous metaplasia in asthma	40	0.0546187	0.0833922	0.122092	0.157994	2	PI3K cat class IA, ERK1/2
985	CHDI_Correlations from Replication data_Causal network (negative correlations)	40	0.0546187	0.0833922	0.122092	0.157994	2	GSK3 beta, PKC
986	MicroRNAs in melanoma	57	0.0548233	0.0786541	0.0548233	0.0786541	3	c-Kit, HGF receptor (Met), Bax
987	Rb proteins signaling in multiple myeloma	18	0.0565252	0.0862025	0.239836	0.290661	1	IL-6
988	Cytoskeleton remodeling_Regulation of actin cytoskeleton organization by the kinase effectors of Rho GTPases	58	0.0571951	0.0818676	0.0571951	0.0818676	3	Alpha-actinin, PIP5KI, PAK
989	Hedgehog signaling in prostate cancer	26	0.0582159	0.0828509	0.0582159	0.0828509	2	Bcl-2, c-Myc
990	Development_NOTCH1-mediated pathway for NF-KB activity modulation	26	0.0582159	0.0828509	0.0582159	0.0828509	2	NF-kB, NFKBIA
991	Neurophysiological process_Constitutive and activity-dependent synaptic AMPA receptor delivery	59	0.059615	0.0847448	0.059615	0.0847448	3	GluR1, PKC, nNOS
992	Stem cells_NOTCH in inhibition of WNT/Beta-catenin-induced osteogenesis	42	0.0615321	0.0929704	0.472972	0.49869	1	GSK3 beta
993	Calcium-dependent regulation of normal and asthmatic smooth muscle contraction	69	0.0616017	0.0929704	0.280002	0.332837	2	Endothelin-1, TrkB
994	Brca1 and Brca2 in breast cancer	19	0.0622994	0.093592	0.251338	0.301947	1	ATR
995	Rho-dependent regulation of normal and asthmatic smooth muscle contraction	28	0.0664075	0.0933314	0.0664075	0.0933314	2	Endothelin-1, PKC
996	Muscle contraction_nNOS signaling in skeletal muscle	28	0.0664075	0.0933314	0.0664075	0.0933314	2	nNOS, Actin
997	Development_Negative regulation of STK3/4 (Hippo) pathway and positive regulation of YAP/TAZ function	62	0.0671574	0.0941721	0.0671574	0.0941721	3	ERK1 (MAPK3), TGF-beta 1, ERK1/2
998	Regulation of degradation of wtCFTR	20	0.0682638	0.10116	0.262667	0.314037	1	Ubiquitin
999	Cytoskeleton remodeling_Role of Activin A in cytoskeleton remodeling	20	0.0682638	0.10116	0.262667	0.314037	1	ACTA2
1000	Development_Activation of Erk by ACM1, ACM3 and ACM5	44	0.0688315	0.101656	0.488833	0.513667	1	ERK1/2
1001	Chemotaxis_C5a-induced chemotaxis	44	0.0688315	0.101656	0.488833	0.513667	1	ERK1/2
1002	Role of epigenetic alterations in proliferation and differentiation of SCLC cells	72	0.069813	0.10299	0.66693	0.673441	1	c-Myc
1003	Eosinophil chemotaxis in asthma	64	0.0724157	0.100975	0.0724157	0.100975	3	VEGFR-1, VEGF-A, CCL13
1004	Neurophysiological process_Activity-dependent synaptic AMPA receptor removal	64	0.0724157	0.100975	0.0724157	0.100975	3	GluR1, PKC, PIPKI gamma
1005	Development_Activation of ERK by Alpha-1 adrenergic receptors	45	0.0726218	0.106773	0.496584	0.520491	1	ERK1/2
1006	Cell adhesion_Histamine H1 receptor signaling in the interruption of cell barrier integrity	45	0.0726218	0.106773	0.496584	0.520491	1	Alpha-actinin
1007	Putative pathways of MHC class I-dependent postsynaptic long-term depression in major depressive disorder	21	0.0744074	0.108666	0.273826	0.325808	1	TNF-alpha
1008	Inhibition of mast cell functions by Siglecs in asthma	30	0.0749554	0.103817	0.0749554	0.103817	2	Syk, Lyn
1009	Gamma-secretase regulation of angiogenesis	30	0.0749554	0.103817	0.0749554	0.103817	2	VEGFR-1, VEGF-A
1010	Inhibition of Ephrin receptors in colorectal cancer	30	0.0749554	0.103817	0.0749554	0.103817	2	Ephrin-A receptor 3, Ephrin-A receptors
1011	Development_Transcription factors in segregation of hepatocytic lineage	30	0.0749554	0.103817	0.0749554	0.103817	2	TGF-beta 1, HGF receptor (Met)
1012	Production of arachidonic acid derivatives by mast cells in asthma	30	0.0749554	0.103817	0.0749554	0.103817	2	c-Kit, ERK1/2
1013	Immune response_Reactive oxygen species (ROS) in IL-4 signaling	66	0.0778527	0.107589	0.0778527	0.107589	3	iNOS, PKC, eNOS
1014	Alternative complement cascade disruption in age-related macular degeneration	31	0.0793541	0.109057	0.0793541	0.109057	2	CRP, VEGF-A
1015	Development_WNT5A signaling	47	0.0804748	0.116457	0.511738	0.532774	1	GSK3 beta
1016	Amitraz-induced inhibition of Insulin secretion	22	0.08072	0.116457	0.284817	0.335667	1	Insulin processed
1017	G-protein signaling_Cross-talk between Ras-family GTPases	23	0.0871913	0.125105	0.295642	0.346451	1	PI3K cat class IA
1018	G-protein signaling_N-RAS regulation pathway	33	0.0883838	0.1204	0.0883838	0.1204	2	Lck, ZAP70
1019	Chemotaxis_CCL19- and CCL21-mediated chemotaxis	33	0.0883838	0.1204	0.0883838	0.1204	2	MMP-9, ERK1/2
1020	Transport_The role of AVP in regulation of Aquaporin 2 and renal water reabsorption	50	0.0929074	0.132725	0.533623	0.553238	1	ERK1/2
1021	Stem cells_FGF2 signaling during embryonic stem cell differentiation	34	0.0930081	0.12587	0.0930081	0.12587	2	FGFR1, ERK1/2
1022	Development_Role of cell-cell and ECM-cell interactions in oligodendrocyte differentiation and myelination	34	0.0930081	0.12587	0.0930081	0.12587	2	Connexin 43, Fyn
1023	Stem cells_Schema: SMAD-dependent TGF-beta family signaling in embryonic stem cells	24	0.0938117	0.13358	0.306304	0.356588	1	TGF-beta 1
1024	Neurophysiological process_GABAergic neurotransmission	51	0.097218	0.13828	0.17983	0.223392	2	GBR1, AATC
1025	Th2-cytokines induced expression of Mucin 5AC and maintenance of mucous cell phenotype in normal airway epithelium	35	0.0977012	0.131078	0.0977012	0.131078	2	ERK1/2, HIF1A
1026	Development_Transcriptional regulation of megakaryopoiesis	35	0.0977012	0.131078	0.0977012	0.131078	2	CD45, CD34
1027	Immune response_Differentiation of natural regulatory T cells	35	0.0977012	0.131078	0.0977012	0.131078	2	Ubiquitin, TGF-beta 1
1028	Reproduction_Gonadotropin-releasing hormone (GnRH) signaling	73	0.098216	0.131626	0.098216	0.131626	3	MEK3(MAP2K3), ERK1/2, p90Rsk
1029	Cytoskeleton remodeling_Neurofilaments	25	0.100572	0.141513	0.316806	0.366067	1	Desmin
1030	Development_Beta adrenergic receptors in brown adipocyte differentiation	36	0.10246	0.136138	0.10246	0.136138	2	MEK3(MAP2K3), FASN
1031	Influence of low doses of Arsenite on Glucose stimulated Insulin secretion in pancreatic cells	36	0.10246	0.136138	0.10246	0.136138	2	Catalase, Insulin
1032	iNKT cell-keratinocyte interactions in allergic contact dermatitis	36	0.10246	0.136138	0.10246	0.136138	2	ICAM1, ERK1/2
1033	G-protein signaling_Regulation of RAC1 activity	36	0.10246	0.136138	0.10246	0.136138	2	Caspase-3, ZAP70
1034	Immune response_Induction of the antigen presentation machinery by IFN-gamma	53	0.106077	0.14878	0.554531	0.569209	1	CD74
1035	Cell adhesion_Role of tetraspanins in the integrin-mediated cell adhesion	37	0.107281	0.141634	0.107281	0.141634	2	CD63, Actin
1036	Immune response_Generation of memory CD4+ T cells	37	0.107281	0.141634	0.107281	0.141634	2	NF-kB, Bcl-2
1037	Neurophysiological process_GABA-B receptor signaling at postsynaptic sides of synapses	26	0.107463	0.150081	0.327149	0.376267	1	GBR1
1038	Dysregulation of indirect glucose-induced inhibition of Glucagon secretion from alpha-cells in type 2 diabetes	54	0.110621	0.153673	0.196234	0.242556	2	PI3K cat class IA, Insulin processed
1039	Immune response_Antigen presentation by MHC class I, classical pathway	54	0.110621	0.153673	0.561292	0.574722	1	HSP70
1040	Transcription_Role of AP-1 in regulation of cellular metabolism	38	0.112162	0.146674	0.112162	0.146674	2	c-Abl, ERK1/2
1041	Stem cells_Noncanonical WNT signaling in cardiac myogenesis	38	0.112162	0.146674	0.112162	0.146674	2	Troponin I, cardiac, PKC
1042	Impaired macrophage phagocytic function in asthma	38	0.112162	0.146674	0.112162	0.146674	2	MMP-9, TNF-alpha
1043	Regulation of lipid metabolism_Regulation of lipid metabolism via LXR, NF-Y and SREBP	38	0.112162	0.146674	0.112162	0.146674	2	AMPK alpha subunit, FASN
1044	Stem cells_Oligodendrocyte differentiation (general schema)	38	0.112162	0.146674	0.112162	0.146674	2	Endothelin-1, PDGF-R-alpha
1045	G-protein signaling_G-Protein alpha-i signaling cascades	27	0.114475	0.158523	0.337337	0.386195	1	ERK1/2
1046	Activation of Notch signaling in breast cancer	39	0.1171	0.152488	0.1171	0.152488	2	ErbB2, HIF1A
1047	Blood coagulation_Blood coagulation	39	0.1171	0.152488	0.1171	0.152488	2	PAI1, PLAT (TPA)
1048	Muscle contraction_ACM regulation of smooth muscle contraction	56	0.119928	0.165549	0.574508	0.587285	1	PKC
1049	Neurophysiological process_GABA-B receptor signaling in presynaptic nerve terminals	28	0.121601	0.166629	0.347372	0.394769	1	GBR1
1050	Mitogenic action of Estradiol / ESR1 (nuclear) in breast cancer	28	0.121601	0.166629	0.347372	0.394769	1	c-Myc
1051	GLP-1 in inhibition of insulin secretion in type 2 diabetes	28	0.121601	0.166629	0.347372	0.394769	1	Insulin processed
1052	Development_Delta-type opioid receptor signaling via G-protein alpha-14	28	0.121601	0.166629	0.347372	0.394769	1	ERK1 (MAPK3)
1053	Role of IGH translocations in multiple myeloma	40	0.122092	0.157994	0.122092	0.157994	2	VEGF-A, c-Myc
1054	EZH2 in Prostate Cancer	29	0.128833	0.175438	0.357255	0.402682	1	ITGB2
1055	Tyrosine metabolism p.2 (melanin)	83	0.130542	0.168227	0.130542	0.168227	3	MIF, AATC, AATM
1056	PDGF activation of prostacyclin synthesis	30	0.136162	0.183322	0.366989	0.410301	1	PDGF-R-beta
1057	Apoptosis and survival_Granzyme A signaling	30	0.136162	0.183322	0.366989	0.410301	1	CD63
1058	T regulatory cells in asthma	30	0.136162	0.183322	0.366989	0.410301	1	TGF-beta 1
1059	Transcription_Ligand-dependent activation of the ESR1/SP pathway	30	0.136162	0.183322	0.366989	0.410301	1	VEGF-A
1060	DNA damage_Role of Brca1 and Brca2 in DNA repair	30	0.136162	0.183322	0.366989	0.410301	1	ATR
1061	Cytoskeleton remodeling_RalA regulation pathway	30	0.136162	0.183322	0.366989	0.410301	1	Aurora-A
1062	POMC, alpha-MSH and AGRP in regulation of food intake and energy expenditure in obesity in hypothalamus	43	0.137364	0.175741	0.137364	0.175741	2	ERK1 (MAPK3), ERK2 (MAPK1)
1063	Development_Notch Signaling Pathway	43	0.137364	0.175741	0.137364	0.175741	2	Ubiquitin, NFKBIA
1064	Sitagliptin in treatment of type 2 diabetes and metabolic syndrome X	10	0.141264	0.180173	0.141264	0.180173	1	Insulin processed
1065	Immune response_IL-13 signaling via JAK-STAT	44	0.142545	0.181248	0.142545	0.181248	2	iNOS, CCL2
1066	Nicotine signaling in chromaffin cells	45	0.147767	0.187313	0.147767	0.187313	2	ERK1/2, p90RSK2(RPS6KA3)
1067	Muscle contraction_Oxytocin signaling in uterus and mammary gland	62	0.149451	0.199776	0.240714	0.291155	2	ERK1/2, PKC
1068	TMPRSS2-ERG fusion in Prostate Cancer	46	0.153028	0.193388	0.153028	0.193388	2	c-Myc, eNOS
1069	Prolactin signaling in Prostate Cancer	33	0.158661	0.209522	0.395322	0.436861	1	AATM
1070	Cytoskeleton remodeling_Thyroliberin in cytoskeleton remodeling	33	0.158661	0.209522	0.395322	0.436861	1	GSK3 beta
1071	Signal transduction_Activin A signaling regulation	33	0.158661	0.209522	0.395322	0.436861	1	Ubiquitin
1072	L-Lysine metabolism	93	0.166039	0.209192	0.166039	0.209192	3	CAT-2, CRAT, CAT-3
1073	Glycolysis and gluconeogenesis	94	0.169735	0.213415	0.169735	0.213415	3	LDHC, LDHA, HXK4
1074	Histidine-glutamate-glutamine metabolism	95	0.173455	0.217872	0.173455	0.217872	3	AATC, ALT1, AATM
1075	Autophagy_Autophagy	35	0.174017	0.226602	0.413506	0.452523	1	Bcl-2
1076	Neurophysiological process_Corticoliberin signaling via CRHR1	50	0.17441	0.218189	0.17441	0.218189	2	MIF, ERK2 (MAPK1)
1077	TGF-beta signaling via microRNA in breast cancer	50	0.17441	0.218189	0.17441	0.218189	2	Bcl-2, TGF-beta 1
1078	DNA damage_Role of NFBD1 in DNA damage response	13	0.179636	0.223392	0.179636	0.223392	1	ATR
1079	Hypoxia-induced EMT in cancer and fibrosis	13	0.179636	0.223392	0.179636	0.223392	1	HIF1A
1080	Microsatellite instability in colorectal cancer	36	0.181783	0.234616	0.422393	0.460219	1	Bax
1081	Gamma-aminobutyrate (GABA) biosynthesis and metabolism	52	0.185275	0.229697	0.185275	0.229697	2	AATC, AATM
1082	Development_Beta-adrenergic receptors signaling via Cyclic AMP	52	0.185275	0.229697	0.185275	0.229697	2	MEK3(MAP2K3), Troponin I, cardiac
1083	Glycogen metabolism	37	0.189599	0.243743	0.431146	0.466887	1	HXK4
1084	Development_Retinoic acid and retinoic acid receptors in regulation of oligodendrocyte differentiation	37	0.189599	0.243743	0.431146	0.466887	1	PDGF-R-alpha
1085	Immune response_Antiviral actions of Interferons	53	0.190744	0.236005	0.190744	0.236005	2	iNOS, PKR
1086	Cell adhesion_Cell-matrix glycoconjugates	38	0.19746	0.251382	0.439767	0.473331	1	MMP-9
1087	Cytoskeleton remodeling_ACM3 and ACM4 in keratinocyte migration	38	0.19746	0.251382	0.439767	0.473331	1	iNOS
1088	Platelet activation as a result of endothelial dysfunction after stenting	56	0.207271	0.255435	0.207271	0.255435	2	PKC, PLAT (TPA)
1089	G-protein signaling_Rap1A regulation pathway	40	0.213293	0.268234	0.456622	0.484745	1	ZAP70
1090	Development_WNT/Beta-catenin and NOTCH in induction of osteogenesis	40	0.213293	0.268234	0.456622	0.484745	1	GSK3 beta
1091	Recurrent gene fusions in Prostate Cancer	40	0.213293	0.268234	0.456622	0.484745	1	SLTM
1092	Regulation of intrinsic membrane properties and excitability of cortical pyramidal neurons	74	0.214177	0.269005	0.308001	0.358228	2	TrkB, PKC
1093	Transport_ACM3 signaling in lacrimal glands	75	0.219828	0.275574	0.681889	0.687429	1	ERK1/2
1094	Cytoskeleton remodeling_Role of PKA in cytoskeleton reorganisation	41	0.221256	0.276834	0.464859	0.492227	1	c-Abl
1095	Renal secretion of inorganic electrolytes	59	0.223943	0.274076	0.223943	0.274076	2	Aquaporin 1, Aquaporin 3
1096	Mitochondrial dysfunction in neurodegenerative diseases	59	0.223943	0.274076	0.223943	0.274076	2	KCRU, Bax
1097	Regulation of lipid metabolism_G-alpha(q) regulation of lipid metabolism	59	0.223943	0.274076	0.223943	0.274076	2	ERK1/2, PKC
1098	DeltaF508-CFTR traffic / ER-to-Golgi in CF	17	0.228158	0.278138	0.228158	0.278138	1	Ubiquitin
1099	wtCFTR traffic / ER-to-Golgi (normal)	17	0.228158	0.278138	0.228158	0.278138	1	Ubiquitin
1100	Development_Thyroliberin signaling	60	0.229524	0.279254	0.229524	0.279254	2	ERK1/2, nNOS
1101	Transport_cAMP/ Ca(2+)-dependent Insulin secretion	44	0.245267	0.302827	0.488833	0.513667	1	Insulin processed
1102	Development_Negative regulation of WNT/Beta-catenin signaling in the cytoplasm	80	0.248499	0.304806	0.705352	0.709928	1	GSK3 alpha/beta
1103	Development_NOTCH-induced EMT	19	0.251338	0.301947	0.251338	0.301947	1	TGF-beta 1
1104	Inhibition of WNT5A-dependent non-canonical pathway in colorectal cancer	19	0.251338	0.301947	0.251338	0.301947	1	c-Myc
1105	Signal transduction_Calcium signaling	46	0.261333	0.319353	0.504219	0.526713	1	Calcipressin 1
1106	Development_TGF-beta-induction of EMT via ROS	20	0.262667	0.314037	0.262667	0.314037	1	TGF-beta 1
1107	wtCFTR and deltaF508-CFTR traffic / Clathrin coated vesicles formation (normal and CF)	20	0.262667	0.314037	0.262667	0.314037	1	Actin
1108	Metabolism in pancreatic cancer cells	66	0.263157	0.314319	0.263157	0.314319	2	GPX1, HIF1A
1109	HCV-dependent regulation of RNA polymerases leading to HCC	21	0.273826	0.325808	0.273826	0.325808	1	HSP70
1110	Neurophysiological process_ACM regulation of nerve impulse	48	0.277408	0.336485	0.519144	0.539579	1	PKC
1111	Development_S1P4 receptor signaling pathway	22	0.284817	0.335667	0.284817	0.335667	1	ERK1/2
1112	wtCFTR traffic / Sorting endosome formation (normal)	22	0.284817	0.335667	0.284817	0.335667	1	Ubiquitin
1113	Ubiquitin-proteasome system in Huntington's disease	22	0.284817	0.335667	0.284817	0.335667	1	Ubiquitin
1114	Microsatellite instability in gastric cancer	22	0.284817	0.335667	0.284817	0.335667	1	Bax
1115	Regulation of lipid metabolism_Regulation of lipid metabolism by niacin and isoprenaline	49	0.285439	0.344949	0.526438	0.546246	1	PKC
1116	Development_Delta- and kappa-type opioid receptors signaling via beta-arrestin	23	0.295642	0.346451	0.295642	0.346451	1	PKC
1117	Transcription_ChREBP regulation pathway	23	0.295642	0.346451	0.295642	0.346451	1	AMPK alpha subunit
1118	Inhibition of Calcitriol/ VDR signaling in colorectal cancer	51	0.301471	0.361654	0.540698	0.559639	1	c-Myc
1119	Development_Signaling of Beta-adrenergic receptors via Beta-arrestins	24	0.306304	0.356588	0.306304	0.356588	1	ERK1/2
1120	Huntingtin-depended transcription deregulation in Huntington's Disease	24	0.306304	0.356588	0.306304	0.356588	1	HSPA1A
1121	DeltaF508-CFTR traffic / Sorting endosome formation in CF	27	0.337337	0.386195	0.337337	0.386195	1	Ubiquitin
1122	Neurophysiological process_GABA-B receptor-mediated regulation of glutamate signaling in Purkinje cells	27	0.337337	0.386195	0.337337	0.386195	1	GBR1
1123	Stem cells_Cytotoxic effect of temozolomide on glioblastoma cells	27	0.337337	0.386195	0.337337	0.386195	1	Ubiquitin
1124	Signal transduction_Amino acid-dependent mTORC1 activation	96	0.342743	0.404499	0.427206	0.465054	2	MEK3(MAP2K3), CAT-3
1125	Role of Diethylhexyl Phthalate and Tributyltin in fat cell differentiation	28	0.347372	0.394769	0.347372	0.394769	1	Leptin
1126	Platelet activation during ADAM-TS13-deficient thrombotic microangiopathy development	28	0.347372	0.394769	0.347372	0.394769	1	P-selectin
1127	Ca(2+)-dependent NF-AT signaling in cardiac hypertrophy	57	0.349104	0.411265	0.580967	0.592424	1	NF-AT3(NFATC4)
1128	Regulation of intrinsic membrane properties and excitability of striatopallidal medium spiny neurons in Huntington's disease	57	0.349104	0.411265	0.580967	0.592424	1	PKC
1129	Androgen biosynthetic pathways	82	0.352305	0.40001	0.352305	0.40001	2	CYP11B2, CYP11B1
1130	NMDA-independent presynaptic long-term potentiation in Huntington's disease	58	0.356947	0.418621	0.587328	0.598419	1	TrkB
1131	Neurophysiological process _Visual perception	29	0.357255	0.402682	0.357255	0.402682	1	Rhodopsin kinase (GRK1)
1132	Muscle contraction_S1P2 receptor-mediated smooth muscle contraction	30	0.366989	0.410301	0.366989	0.410301	1	PRKD1
1133	Stem cells_Role of BMP signaling in embryonic stem cell neural differentiation	30	0.366989	0.410301	0.366989	0.410301	1	ERK1/2
1134	Neurophysiological process_nNOS signaling in neuronal synapses	30	0.366989	0.410301	0.366989	0.410301	1	nNOS
1135	Stimulation of gastric acid secretion in gastric cancer	60	0.372527	0.433018	0.599764	0.610088	1	ERK1/2
1136	Glucose-excited neurons of ventromedial nucleus (rodent model)	32	0.386021	0.429643	0.386021	0.429643	1	HXK4
1137	Regulation of intrinsic membrane properties and excitability of striatonigral medium spiny neurons in Huntington's disease	62	0.387955	0.446984	0.611827	0.621849	1	PKC
1138	Muscle contraction_Role of kappa-type opioid receptor in heart	33	0.395322	0.436861	0.395322	0.436861	1	Troponin I, cardiac
1139	Development_WNT and Notch signaling in early cardiac myogenesis	35	0.413506	0.452523	0.413506	0.452523	1	GSK3 beta
1140	Neurophysiological process_Ephrin-B receptors in dendritic spine morphogenesis and synaptogenesis	35	0.413506	0.452523	0.413506	0.452523	1	Fyn
1141	G-protein signaling_Rac2 regulation pathway	36	0.422393	0.460219	0.422393	0.460219	1	iNOS
1142	Attenuation of IFN type I signaling in melanoma cells	37	0.431146	0.466887	0.431146	0.466887	1	c-Myc
1143	L-Tryptophan metabolism (part 2)	97	0.43239	0.467825	0.43239	0.467825	2	CRAT, AATM
1144	Defective efferocytosis in COPD	38	0.439767	0.473331	0.439767	0.473331	1	PECAM1
1145	wtCFTR and deltaF508-CFTR traffic / Generic schema (normal and CF)	38	0.439767	0.473331	0.439767	0.473331	1	Ubiquitin
1146	Nociception_Pro-nociceptive action of Nociceptin in spinal cord at low doses	39	0.448258	0.481219	0.448258	0.481219	1	nNOS
1147	VLDL, LDL dyslipidemia in type 2 diabetes and metabolic syndrome X	39	0.448258	0.481219	0.448258	0.481219	1	Insulin processed
1148	Development_Positive regulation of STK3/4 (Hippo) pathway and negative regulation of YAP/TAZ function	71	0.45511	0.51034	0.661789	0.66934	1	AMPK alpha subunit
1149	Role of Ghrelin in activation eating behavior in obesity	40	0.456622	0.484745	0.456622	0.484745	1	AMPK alpha subunit
1150	Development_Astrocyte differentiation from adult stem cells	40	0.456622	0.484745	0.456622	0.484745	1	ERK1/2
1151	Development_Growth hormone-releasing hormone (GH-RH) signaling	41	0.464859	0.492227	0.464859	0.492227	1	ERK1/2
1152	Serotonin modulation of dopamine release in nicotine addiction	42	0.472972	0.49869	0.472972	0.49869	1	PKC
1153	Disruption of methionine metabolism in induction and progression of HCC	42	0.472972	0.49869	0.472972	0.49869	1	c-Myc
1154	Stem cells_Excitotoxicity of Glutamate in glioblastoma	45	0.496584	0.520491	0.496584	0.520491	1	AATC
1155	Vitamin B3 and NAD+ metabolism	125	0.50824	0.553906	0.566243	0.579314	2	Connexin 43, GLYAT
1156	Muscle contraction_GPCRs in the regulation of smooth muscle tone	83	0.537693	0.579735	0.718594	0.721501	1	Endothelin-1
1157	Stem cells_Hedgehog, BMP and Parathyroid hormone in osteogenesis	51	0.540698	0.559639	0.540698	0.559639	1	ERK1/2
1158	Neurophysiological process_Synaptic vesicle fusion and recycling in nerve terminals	52	0.547668	0.564967	0.547668	0.564967	1	PIPKI gamma
1159	Immune response_T cell subsets: cell surface markers	52	0.547668	0.564967	0.547668	0.564967	1	TGF-beta 1
1160	Neurophysiological process_Long-term depression in cerebellum	53	0.554531	0.569209	0.554531	0.569209	1	ERK1/2
1161	Arsenite metabolism and transport	54	0.561292	0.574722	0.561292	0.574722	1	Aquaporin 3
1162	Aminosugar metabolism	60	0.599764	0.610088	0.599764	0.610088	1	HXK4
1163	Glutathione metabolism	71	0.661789	0.66934	0.661789	0.66934	1	GPX1
1164	Phosphatidylinositol metabolism	85	0.727092	0.729444	0.727092	0.729444	1	PI52A
1165	Interconnectivity between Folic acid and Fluorouracil pathways in gastric cancer	91	0.751085	0.752298	0.751085	0.752298	1	Aquaporin 3
1166	Saturated fatty acids synthesis to hexadecanoic acid	101	0.7865	0.787135	0.7865	0.787135	1	FASN
1167	ATP metabolism	107	0.805295	0.805295	0.805295	0.805295	1	Connexin 43

## Sheet: Info
Info
General
Date	2019-11-20
Server	portal.genego.com
Version	19.3.69800
Name	Tongxing
Login	genenet-wang
Workflow Settings
Type	Enrichment
Signals	both
Distribution	intersection
Sorting method	statistically significant
Active Data
Name	Type	Size		Threshold	0
CDDP 77+ 77 less 80	General	145
